# Supplementary material for: CREB5 reprograms FOXA1 nuclear interactions to promote resistance to androgen receptor-targeting therapies
Source: eLife. 2022 May 12;11:e73223. doi: 10.7554/eLife.73223 (PMC9135408; doi:10.7554/eLife.73223)
Supplement: Supplementary file 1. — Table 1. Z-scores for each gene from the genome-scale screen are presented and ranked.Table 2. Unique peptide counts are displayed for the RIME experiment based on each condition.Table 3. Unique peptide counts are displayed for the RIME experiment based on each condition.Table 4. Unique peptide counts are displayed for the RIME experiment based on each condition. [file elife-73223-supp1.xlsx]

## Sheet: Table 1
GENE	Baseline Score	Enzalutamide+CSS score	Differential Score	RANK
CREB5	-1.33447	14.5301	15.8645	1
PAX7	-1.70437	7.84122	9.54559	2
GRHL1	0.48314	9.32879	8.84565	3
RARG	-2.47298	5.42746	7.90044	4
FGF6	-1.55887	5.56737	7.12624	5
CYP1A1	-2.39671	4.6194	7.0161	6
RARB	0.351344	6.78527	6.43393	7
USP36	-1.65006	4.36751	6.01756	8
PIM3	-4.29098	1.60227	5.89325	9
SLC10A1	-3.10443	2.55569	5.66012	10
PHF23	-0.897274	4.72589	5.62317	11
LPAR5	-3.03214	2.49394	5.52608	12
RBMS2	-4.23551	1.28526	5.52077	13
PLA2G10	-2.12683	3.36233	5.48916	14
HOXA1	-1.92906	3.51093	5.43999	15
ARMC12	-3.19109	2.18919	5.38028	16
LIF	-1.98859	3.33839	5.32699	17
PRR20A	-2.4175	2.80849	5.22599	18
ENDOV	-1.77961	3.43529	5.2149	19
ZNF431	-1.1801	4.01121	5.19131	20
TUBGCP4	-2.03454	3.13936	5.1739	21
SLCO1B1	-0.789762	4.28848	5.07825	22
C1QTNF9	-0.884839	4.07232	4.95716	23
FGFR2	-1.0828	3.83621	4.919	24
MAPK9	-2.95567	1.95539	4.91106	25
SNRNP40	-1.75415	3.0966	4.85075	26
CDK4	0.923916	5.76229	4.83838	27
INS	0.221353	5.04025	4.8189	28
FGFR2	-2.00994	2.80168	4.81162	29
SLC8B1	-1.98383	2.79218	4.77601	30
PRKX	-3.45752	1.31379	4.77131	31
ZC3H10	-4.06115	0.708331	4.76948	32
ATF3	-3.27165	1.49702	4.76866	33
C9orf64	-2.70188	2.00148	4.70336	34
PLSCR4	-2.40715	2.2614	4.66855	35
SSBP4	-4.08961	0.544503	4.63411	36
PCBP1	-2.24024	2.38019	4.62043	37
DAPK3	-2.27234	2.31303	4.58537	38
DLX6	-1.69388	2.83656	4.53044	39
HSPD1	-3.26885	1.23716	4.50601	40
FGFR2	-1.37541	3.1302	4.50561	41
TM4SF19	-1.72161	2.7734	4.49501	42
LOC100509620	-0.955942	3.53261	4.48855	43
PCCB	-1.08985	3.39179	4.48164	44
ETV5	-1.43612	3.04327	4.47939	45
CXCL10	-1.1448	3.33437	4.47917	46
FGFR3	-1.54198	2.93164	4.47362	47
ZFP64	-2.61229	1.83389	4.44618	48
TRIM3	-1.3625	3.02995	4.39245	49
ADRB2	-2.64601	1.74467	4.39068	50
ILDR1	-1.60286	2.77558	4.37844	51
PIM1	-2.77701	1.59188	4.36889	52
ARHGAP11A	-1.94888	2.41979	4.36867	53
STK40	-1.75221	2.5906	4.34281	54
IPPK	-1.56754	2.7326	4.30014	55
PIP5K1B	-1.30235	2.99611	4.29847	56
CLASP1	-1.88239	2.41607	4.29846	57
ZBTB9	-0.981996	3.29766	4.27965	58
MKX	-2.2071	2.05806	4.26517	59
ACTN4	-2.65007	1.60848	4.25856	60
PIM1	-2.85904	1.38089	4.23993	61
RNF183	-1.43245	2.80652	4.23897	62
NTRK2	0.822525	5.05393	4.23141	63
SAA2	-1.42028	2.79536	4.21564	64
GPR87	-1.1216	3.07603	4.19762	65
JUN	-3.17712	1.00548	4.18261	66
SLC5A11	-3.5188	0.662637	4.18143	67
ACSL5	-0.776941	3.38988	4.16683	68
MSC	-4.92661	-0.76027	4.16634	69
GTF2E2	-1.44617	2.71164	4.15782	70
CMPK1	-1.66401	2.46858	4.13259	71
C1orf50	-2.01832	2.11331	4.13163	72
SGK2	-1.05595	3.07036	4.12632	73
IRX6	-3.10656	1.01295	4.11951	74
NCAPH2	-2.20107	1.89916	4.10023	75
NR1I3	-0.0876355	4.00186	4.08949	76
GPR26	-3.53002	0.552704	4.08272	77
DMRTB1	-1.19829	2.88193	4.08021	78
RARA	-2.44851	1.58065	4.02916	79
GPC3	-1.33503	2.68898	4.02401	80
PNLIP	-1.39322	2.58738	3.9806	81
SPIN2A	-2.82853	1.15007	3.9786	82
MZT2B	-1.04939	2.92609	3.97548	83
HSD3B1	-0.936551	3.0257	3.96225	84
CAPZA2	-1.40351	2.54445	3.94796	85
LPAR5	-2.35047	1.5907	3.94117	86
GPR141	-0.558455	3.38201	3.94047	87
SLC14A1	-1.98646	1.94787	3.93433	88
C1orf116	-1.70465	2.22769	3.93234	89
BATF	-3.79835	0.128084	3.92643	90
MAS1L	-0.794803	3.11337	3.90817	91
KIAA1598	-1.59596	2.31163	3.90758	92
PANK3	-1.59216	2.29347	3.88563	93
ISG20	-0.73941	3.1421	3.88151	94
ESRRA	-3.10974	0.758824	3.86857	95
HSP90B1	-1.4851	2.37521	3.8603	96
ICK	-1.47724	2.38077	3.85801	97
IMPA1	-1.01095	2.8447	3.85565	98
S100A9	-1.09889	2.71512	3.81401	99
ARHGAP8	-2.80693	0.994291	3.80122	100
TMEM139	-4.76326	-0.963428	3.79983	101
STOML3	-0.824258	2.97459	3.79885	102
EFCAB11	-1.14896	2.64178	3.79074	103
GCGR	-1.2745	2.51322	3.78771	104
H2AFJ	-2.23222	1.54555	3.77776	105
PSMC4	-3.6163	0.156564	3.77286	106
SLC10A1	-1.43921	2.32625	3.76546	107
ADCY9	-1.61341	2.14898	3.7624	108
ELP5	-1.55676	2.20263	3.75938	109
MPP3	-1.37706	2.37846	3.75552	110
CUL2	-0.939479	2.81528	3.75476	111
SSBP2	-2.32551	1.42046	3.74597	112
RAPSN	-2.51105	1.23163	3.74268	113
DLX5	-3.82826	-0.0861208	3.74214	114
ICK	-2.16003	1.57916	3.73919	115
HORMAD2	-1.19842	2.53843	3.73685	116
OSGEPL1	-2.974	0.747491	3.72149	117
ZNF16	1.30292	5.01473	3.7118	118
EWSR1	-1.11404	2.57983	3.69387	119
HNRNPCL1	0.377842	4.06921	3.69137	120
RRAGC	-1.21486	2.47224	3.6871	121
ACBD6	-0.71542	2.96039	3.67581	122
MRPL48	-1.35671	2.31493	3.67165	123
DTX2	-1.47168	2.18858	3.66026	124
SLC26A1	-0.871557	2.77647	3.64802	125
GPR61	-2.8093	0.824624	3.63393	126
KMO	-1.74934	1.88344	3.63278	127
RPL35	-1.34926	2.27444	3.62371	128
RNF125	-3.21104	0.407683	3.61872	129
SGK2	-0.70519	2.90685	3.61204	130
EXT1	-1.38607	2.22112	3.60719	131
CAPNS2	-0.337622	3.26951	3.60713	132
DCP1A	-2.01731	1.58075	3.59806	133
CDK20	-1.57349	2.02264	3.59613	134
JAK3	-0.411811	3.17247	3.58428	135
OR9Q1	-0.420474	3.15221	3.57268	136
ING1	-2.61764	0.951657	3.5693	137
PRKG1	-1.24831	2.31711	3.56541	138
SPIN2B	-3.81494	-0.249569	3.56537	139
FKBP9	-1.23424	2.32501	3.55926	140
VPS11	-0.64192	2.91295	3.55487	141
F2R	-0.495148	3.05791	3.55306	142
FAM78B	-1.71549	1.83311	3.5486	143
MRPL43	-1.92521	1.62219	3.54741	144
PTH1R	-3.91508	-0.368437	3.54664	145
ARL11	-0.712437	2.82927	3.54171	146
BMPR1B	-1.34689	2.19249	3.53938	147
MAGEC2	-1.01291	2.5192	3.53211	148
PPAPDC1B	-1.53865	1.98767	3.52632	149
SYNDIG1	-1.07213	2.44841	3.52053	150
NTRK3	-3.38783	0.130228	3.51806	151
PTPRR	-0.23184	3.28303	3.51487	152
FGFR3	0.203792	3.71786	3.51407	153
FADS1	-1.46261	2.04658	3.50918	154
ISL1	-2.09107	1.41662	3.50769	155
LENG1	-1.19292	2.3128	3.50572	156
TRIM15	-1.45811	2.04679	3.5049	157
CDK8	-2.13581	1.35113	3.48695	158
PRKG1	-1.69312	1.78773	3.48085	159
C9orf171	-1.43414	2.04596	3.4801	160
ZAR1L	-0.673689	2.79556	3.46925	161
CDCA4	-3.53265	-0.0651084	3.46754	162
KHDRBS2	-2.86707	0.600282	3.46735	163
UBE2S	-0.597116	2.86508	3.46219	164
GMCL1P1	-0.740098	2.71973	3.45983	165
PCMTD2	-0.906791	2.55218	3.45897	166
FTSJ1	-0.849804	2.60521	3.45501	167
SIGMAR1	-0.53777	2.90826	3.44603	168
FRMPD2	-1.61221	1.83356	3.44577	169
CHRNB3	-0.314942	3.13075	3.44569	170
NDUFB11	-1.42564	2.01942	3.44507	171
MTUS1	-1.73759	1.70698	3.44457	172
CBLC	-1.21574	2.22656	3.44229	173
GCM1	-2.43472	1.00425	3.43897	174
LCA5L	-1.03691	2.39732	3.43423	175
PRKX	-3.23176	0.202087	3.43385	176
ZNF462	-0.745392	2.68633	3.43172	177
RPL17	-1.1564	2.26929	3.42569	178
VDAC2	-1.51956	1.90548	3.42504	179
DFNA5	-1.59015	1.82742	3.41757	180
PTGER2	-3.37523	0.0322229	3.40745	181
FBXO5	-0.799377	2.60231	3.40169	182
SLCO1B1	-1.95268	1.44305	3.39573	183
TOX2	-1.80447	1.58885	3.39332	184
GGTLC2	-1.22031	2.16873	3.38904	185
CEP70	0.464544	3.8534	3.38885	186
HSD17B3	-1.69834	1.68709	3.38542	187
UHMK1	-1.34967	2.03542	3.38509	188
GAS8	-1.21986	2.1643	3.38416	189
TLR1	-2.43073	0.951244	3.38197	190
ETV1	-0.741913	2.63578	3.37769	191
CRYGB	-0.665838	2.71093	3.37677	192
CLRN2	-2.49348	0.878636	3.37212	193
CCR1	-2.00108	1.36592	3.367	194
MPP1	-1.23376	2.13314	3.3669	195
ATMIN	0.734063	4.09386	3.35979	196
ZBTB43	-1.70382	1.6555	3.35932	197
ACTR6	-1.05232	2.30691	3.35923	198
DHRS9	-1.4275	1.92919	3.35669	199
ZNF695	-1.01567	2.33665	3.35232	200
SLC6A2	-2.60441	0.74217	3.34658	201
BCL2L14	-1.54294	1.79787	3.34081	202
SEC61G	-1.1783	2.15789	3.33619	203
KIFC3	-2.07861	1.2479	3.32651	204
MAX	-2.84449	0.481912	3.3264	205
GHITM	-0.447918	2.87573	3.32365	206
MAGEC2	-0.714271	2.60229	3.31656	207
SLC27A2	-0.719678	2.59094	3.31062	208
MCCC2	-1.12195	2.18376	3.30571	209
RARB	-1.70153	1.60372	3.30525	210
B9D2	-1.08024	2.22191	3.30216	211
AFM	-0.149809	3.15023	3.30004	212
AGER	-0.713185	2.58428	3.29747	213
VCP	-1.69407	1.59657	3.29064	214
PRPS2	-1.24849	2.0351	3.28359	215
SPATA8	-1.18675	2.09491	3.28166	216
GIMAP8	-0.979077	2.29781	3.27688	217
SNRNP27	-1.94242	1.33435	3.27677	218
UPP2	-1.30371	1.97248	3.27619	219
CNOT7	-0.722183	2.55325	3.27544	220
TUBA1C	-1.51837	1.75478	3.27315	221
PPARG	-2.225	1.04487	3.26987	222
GPR52	-3.27928	-0.0191377	3.26014	223
PLEKHN1	-2.34466	0.913825	3.25849	224
GPR35	-1.86438	1.3907	3.25508	225
CALCRL	-0.371483	2.87973	3.25121	226
EPHA7	-0.199585	3.04979	3.24937	227
SLC7A2	-2.34705	0.90209	3.24914	228
R3HDML	-0.550286	2.69788	3.24816	229
ALAS2	-1.74997	1.4973	3.24728	230
GPR161	-2.26927	0.976611	3.24588	231
PF4	-1.24337	1.99912	3.24249	232
FIGNL1	-1.69004	1.55093	3.24096	233
GALK2	-1.25774	1.98315	3.24089	234
RSPO3	0.323944	3.56472	3.24078	235
ATP6V0E2	-1.4272	1.81244	3.23963	236
ARHGEF16	-1.39475	1.84415	3.23891	237
SPIB	-2.99658	0.240115	3.23669	238
ETHE1	-1.01516	2.21857	3.23373	239
EPHX2	-0.62741	2.60539	3.2328	240
C9orf78	-1.15987	2.07272	3.23258	241
PRIMPOL	0.113785	3.34271	3.22893	242
H2BFWT	-2.82959	0.393598	3.22319	243
MXD1	-3.14916	0.0735641	3.22273	244
STK38	-1.25082	1.97033	3.22115	245
GALNT3	-0.681677	2.53931	3.22099	246
WDR63	-1.05328	2.16594	3.21922	247
VCX3A	-2.08747	1.12866	3.21612	248
ALPK1	-2.74779	0.454475	3.20226	249
BMP5	0.00159218	3.19797	3.19638	250
TBX15	0.1877	3.3837	3.196	251
NME1	-1.06252	2.1314	3.19392	252
CRCT1	-0.885051	2.30629	3.19134	253
PRKAG2	-2.4378	0.752411	3.19021	254
VDR	-3.59401	-0.408833	3.18518	255
PTGDR	-2.57436	0.60921	3.18357	256
MAPT	-3.26755	-0.0861635	3.18139	257
RPP14	0.703386	3.87767	3.17428	258
ACOX2	-1.7345	1.42902	3.16352	259
FUT9	-1.88229	1.27572	3.158	260
CRYM	-1.76875	1.38681	3.15556	261
GNRHR	-0.99647	2.15407	3.15054	262
CIART	-0.91146	2.23484	3.1463	263
ANGPTL7	-1.3667	1.77796	3.14466	264
TMEM164	-1.38896	1.75556	3.14452	265
SLC38A1	-3.16463	-0.0266171	3.13801	266
OR4D10	-1.44752	1.68909	3.13662	267
NDUFA7	-1.35963	1.77501	3.13464	268
PPIL2	-1.08723	2.04455	3.13178	269
NLK	-4.29372	-1.16238	3.13134	270
MTCH2	-1.5732	1.55407	3.12727	271
LINC00671	-0.882964	2.24048	3.12344	272
TRBV7-2	-1.17669	1.94395	3.12063	273
METTL13	-2.16912	0.951128	3.12025	274
GRIN2A	0.312531	3.43124	3.11871	275
MPP5	-1.32084	1.79543	3.11627	276
CDK17	-1.3333	1.77909	3.11239	277
C10orf54	-1.54226	1.56945	3.11171	278
BAG6	-0.935482	2.17576	3.11124	279
FGFR2	-1.45639	1.65446	3.11086	280
C15orf41	-1.41008	1.69966	3.10974	281
DLG3	-0.961563	2.14565	3.10721	282
AK4	-1.35873	1.74834	3.10706	283
SLC2A3	-1.41552	1.69015	3.10567	284
POLR2D	-3.64443	-0.540739	3.10369	285
AMIGO1	-1.71498	1.38702	3.102	286
PCOLCE2	-0.658277	2.44314	3.10142	287
CAPN9	-1.40202	1.69777	3.09979	288
APBA3	0.485664	3.58076	3.0951	289
CAMKK1	-0.900056	2.19501	3.09507	290
ESRRG	-2.63513	0.457225	3.09236	291
ZNF747	-2.05805	1.0331	3.09115	292
LILRB1	-2.15417	0.933804	3.08797	293
PITPNA	-1.04479	2.03984	3.08463	294
UGT1A9	-0.104219	2.97969	3.08391	295
HOXC11	-3.59355	-0.511853	3.0817	296
NTRK3	-1.94332	1.13838	3.0817	297
SORD	-1.52658	1.55244	3.07902	298
CDK5RAP3	-2.12971	0.948508	3.07822	299
ZNF581	-0.387625	2.69055	3.07817	300
WT1	-1.104	1.97351	3.07752	301
ABT1	-1.91145	1.16153	3.07298	302
DGKE	-0.307638	2.76371	3.07135	303
GLIS3	-1.24735	1.82278	3.07013	304
SPINK13	-1.71316	1.35515	3.06832	305
SUV420H1	-1.98137	1.0836	3.06497	306
CTDSP2	-1.86228	1.20264	3.06493	307
PIN1	-1.09542	1.96844	3.06386	308
CIRH1A	-3.00062	0.0607373	3.06136	309
CSAD	-1.25122	1.80922	3.06044	310
PTBP2	0.0106748	3.07093	3.06025	311
ELAC2	-0.348255	2.71165	3.05991	312
AIMP2	-0.222499	2.83375	3.05625	313
CXCR5	-0.985303	2.07074	3.05605	314
DGCR8	-1.47025	1.58458	3.05483	315
ZNF569	-1.47921	1.57413	3.05334	316
ZC2HC1A	-1.03796	2.01302	3.05098	317
PIK3R4	-0.300303	2.74719	3.0475	318
KCNIP1	-1.22476	1.82228	3.04704	319
GPC1	0.523352	3.56767	3.04432	320
TOMM40L	-1.51039	1.53064	3.04102	321
PCSK1	-2.42993	0.60853	3.03846	322
RBP4	-1.35877	1.67926	3.03803	323
C3orf30	-1.42678	1.60929	3.03607	324
HMBOX1	-1.02605	2.00996	3.03601	325
PNLIP	-1.36477	1.66847	3.03325	326
BAG1	-1.24102	1.79107	3.03209	327
ERLIN2	-0.917866	2.11321	3.03108	328
DPP4	-0.263755	2.76625	3.03001	329
ADAM30	-0.8373	2.19241	3.02971	330
FOPNL	-0.469127	2.56014	3.02927	331
NR4A2	-1.76167	1.26471	3.02638	332
HIF1A	-0.0939668	2.93203	3.026	333
BLK	-0.642688	2.38317	3.02585	334
SNRPA	-2.19565	0.82713	3.02278	335
TRIM42	-0.861443	2.15611	3.01755	336
RND2	-1.3569	1.65967	3.01656	337
LYSMD2	-0.863524	2.14919	3.01272	338
ZNF287	-0.212076	2.79782	3.00989	339
GPR162	-1.43167	1.57685	3.00852	340
TAMM41	-1.58871	1.41451	3.00321	341
MAPRE2	-1.08644	1.91652	3.00297	342
PTGIR	-1.24676	1.75486	3.00162	343
PI4KA	-1.61164	1.38967	3.00131	344
CSNK1A1	-1.2008	1.8005	3.00131	345
ETFB	-0.929852	2.06555	2.99541	346
FOSL2	-2.048	0.945898	2.9939	347
FPR3	-0.959236	2.03442	2.99366	348
PSMB4	-0.324177	2.66802	2.9922	349
PEX10	-1.00987	1.97947	2.98934	350
MOXD1	-0.36714	2.62004	2.98718	351
FMR1	-1.20065	1.78451	2.98517	352
ZNF770	-2.21528	0.763364	2.97864	353
IL2RB	-1.40484	1.57352	2.97836	354
ALG10	-0.951415	2.02648	2.97789	355
NCAPD3	-0.874567	2.1031	2.97767	356
TNFAIP1	-1.28677	1.68862	2.97539	357
HOXC4	-3.48396	-0.511707	2.97226	358
ACTG1	-2.49438	0.476349	2.97073	359
MBNL1	-2.14742	0.821757	2.96918	360
CDC25B	0.0800725	3.04673	2.96666	361
PRKACG	-1.04918	1.91644	2.96563	362
ZNF266	-2.16881	0.796642	2.96545	363
FDXACB1	-1.00488	1.95985	2.96473	364
LDLR	-3.14907	-0.185057	2.96402	365
MZT2B	-1.44648	1.51465	2.96113	366
MGST1	-1.03541	1.92571	2.96112	367
TMEM115	-1.69447	1.25741	2.95188	368
PRR3	-0.826832	2.12383	2.95066	369
PRR4	-0.57338	2.37561	2.94899	370
TSHR	-0.763143	2.18541	2.94856	371
ADPRHL1	-1.70942	1.23841	2.94782	372
PTH2R	-0.702556	2.24392	2.94648	373
BTC	-1.30378	1.642	2.94578	374
B2M	-1.66459	1.28004	2.94462	375
UEVLD	0.236824	3.18127	2.94444	376
CLRN3	-0.502202	2.44004	2.94224	377
SCARB1	-2.25453	0.687626	2.94216	378
C17orf62	-1.4697	1.47154	2.94124	379
FAM120A	-1.47727	1.46373	2.94101	380
FEM1C	-1.31002	1.63036	2.94038	381
SLC35G2	-0.965751	1.97308	2.93883	382
LMO1	0.511914	3.45041	2.93849	383
TBPL2	-2.40989	0.526879	2.93676	384
MBLAC2	-0.694649	2.23956	2.93421	385
SLC25A33	-0.539568	2.39436	2.93393	386
ITM2A	-1.39444	1.53896	2.93339	387
ZNF24	-1.47616	1.45187	2.92803	388
PROKR2	-1.20688	1.7202	2.92708	389
ZCCHC9	-1.73092	1.19616	2.92708	390
LBR	0.414064	3.34008	2.92602	391
HOXA9	-1.02588	1.89921	2.92508	392
ADH1C	-0.510524	2.41396	2.92449	393
BATF3	-2.13296	0.785358	2.91832	394
AK3	-0.687684	2.22949	2.91718	395
RPL22L1	-0.772303	2.14323	2.91553	396
RNF146	-0.414555	2.49986	2.91442	397
DYRK1B	-2.05451	0.859759	2.91427	398
RACGAP1	-1.75231	1.15954	2.91185	399
MIIP	-0.85611	2.0459	2.90201	400
EGR1	-3.92049	-1.01886	2.90163	401
RNF167	-2.04655	0.853334	2.89988	402
DEFA3	-1.55264	1.34546	2.8981	403
RPL15	-3.39038	-0.495692	2.89468	404
NR1H4	-2.47596	0.417491	2.89345	405
TMEM51	-3.55503	-0.663803	2.89123	406
STK40	-1.36014	1.52926	2.8894	407
ADCK4	-0.777803	2.11033	2.88814	408
CDC42EP3	-2.48497	0.401555	2.88652	409
SV2B	-1.654	1.23155	2.88554	410
PRPF31	-1.16524	1.71053	2.87577	411
CD59	-0.998059	1.87745	2.87551	412
HTR1B	-0.527708	2.34769	2.8754	413
ZCCHC9	-1.23112	1.64124	2.87235	414
GABRP	-1.46254	1.40965	2.87219	415
RNF182	-1.08736	1.78395	2.87131	416
PTGIR	-1.26974	1.60041	2.87015	417
APLF	-1.14397	1.72328	2.86725	418
TFAM	-0.0986231	2.76722	2.86585	419
WDR74	-0.691694	2.17339	2.86509	420
RIMKLA	-0.686223	2.17783	2.86405	421
ALS2CR11	0.202067	3.06402	2.86195	422
STX8	-0.157248	2.70422	2.86147	423
LIPT1	-1.03393	1.82357	2.8575	424
HAUS6	0.529317	3.38611	2.85679	425
ANXA2R	-3.45013	-0.594024	2.8561	426
ARL6IP6	-1.15163	1.70307	2.8547	427
HBP1	0.107587	2.95275	2.84516	428
DHCR24	-1.10171	1.74236	2.84407	429
PKNOX1	-2.8086	0.0327799	2.84138	430
DSTYK	-0.362958	2.47824	2.8412	431
MOGAT3	-1.70411	1.13602	2.84013	432
BMPR1B	-1.31124	1.528	2.83924	433
TNFSF13B	-0.718107	2.11846	2.83656	434
GNB2L1	-0.782976	2.0523	2.83528	435
CLEC4C	-0.932532	1.90182	2.83435	436
TSHR	-2.0275	0.805854	2.83335	437
NBPF11	-1.34704	1.48049	2.82753	438
SPA17	-1.36766	1.45771	2.82537	439
ERCC2	-0.936333	1.88762	2.82395	440
BCL6	-0.875853	1.94711	2.82297	441
P2RY11	-1.85884	0.961145	2.81998	442
C22orf31	-3.15434	-0.335245	2.8191	443
PCDHAC1	-1.47773	1.33765	2.81538	444
ACTR3B	-2.4377	0.376796	2.8145	445
CKMT1A	-0.869729	1.94163	2.81136	446
PTH1R	-0.36684	2.44393	2.81077	447
RCOR3	-1.52336	1.2869	2.81026	448
FAM221B	-0.757574	2.05205	2.80962	449
LAMP5	-1.35846	1.44887	2.80733	450
AZIN1	-1.15938	1.64724	2.80662	451
GNB5	-0.822873	1.98007	2.80294	452
BAD	-1.94134	0.861064	2.8024	453
PHF20L1	-2.4666	0.335618	2.80222	454
LOC642204	-0.434828	2.36648	2.80131	455
ATPIF1	-0.815892	1.98354	2.79943	456
LSM3	-1.33083	1.46579	2.79662	457
SLC13A2	-0.585238	2.20792	2.79316	458
AOC3	-0.957228	1.83304	2.79027	459
ETV4	-1.56589	1.22436	2.79025	460
STK17B	-1.65191	1.13764	2.78954	461
EME1	-1.17655	1.61254	2.78909	462
KRT18P55	-1.57287	1.21486	2.78772	463
CRACR2B	-1.43507	1.34895	2.78402	464
KIF2A	-1.86931	0.914531	2.78384	465
BOD1	0.459619	3.24226	2.78264	466
CALCA	-1.40507	1.37616	2.78123	467
NUDT16	-2.16836	0.61086	2.77922	468
MC5R	-1.7453	1.03162	2.77692	469
SNAPC3	-0.408135	2.36849	2.77662	470
FKBP8	-1.38156	1.39355	2.77511	471
DDX21	-1.09257	1.67675	2.76932	472
RBMS3	-1.02492	1.74371	2.76862	473
PIGF	-1.52895	1.2395	2.76845	474
KCNJ10	-0.851476	1.91668	2.76815	475
TRIM5	-1.06413	1.69758	2.76171	476
HEXB	-1.50889	1.25131	2.7602	477
UHMK1	-1.04064	1.71887	2.75951	478
PAQR7	-2.12482	0.631532	2.75635	479
TTC33	-1.45798	1.29709	2.75507	480
FGFR1	-0.287942	2.46493	2.75287	481
DDX21	-0.617789	2.13182	2.74961	482
C14orf177	-0.896261	1.85251	2.74877	483
ALOX15	-1.15462	1.59322	2.74784	484
TTK	0.297859	3.04538	2.74752	485
DPY19L4	0.218141	2.96222	2.74408	486
42251	0.207082	2.94948	2.7424	487
PIM2	-1.20979	1.52926	2.73905	488
IER2	-1.87861	0.85812	2.73674	489
TTC8	-1.23174	1.50493	2.73668	490
CSNK2A1	-1.41089	1.32433	2.73522	491
HIST1H2BN	-0.68777	2.04568	2.73345	492
DARS2	-1.52686	1.20433	2.73118	493
TMEM161A	-0.796785	1.93386	2.73064	494
DNAJC7	-0.272998	2.45745	2.73045	495
PSMB4	-0.912222	1.81479	2.72701	496
IGHV4-31	-1.2304	1.49624	2.72664	497
HTR3C	-0.592637	2.13332	2.72596	498
RABGAP1L	-1.30147	1.42394	2.72541	499
GPR101	-2.87747	-0.153232	2.72424	500
HIST1H2BF	-1.39641	1.32018	2.71659	501
DDR2	-0.745319	1.97109	2.7164	502
AKT2	-3.10549	-0.390983	2.7145	503
POGK	-1.45937	1.25236	2.71173	504
LBP	-0.712178	1.99911	2.71128	505
LILRA1	-0.572346	2.13877	2.71111	506
MITD1	-2.93674	-0.227192	2.70955	507
EEF1D	-1.60142	1.10779	2.70921	508
MEOX1	-3.22597	-0.519158	2.70681	509
KRT4	-1.47517	1.23155	2.70672	510
LSM14B	-0.378719	2.32612	2.70484	511
DOLK	-1.51178	1.19297	2.70475	512
TAS2R60	-0.0603049	2.64357	2.70388	513
CDK1	-1.15275	1.55063	2.70338	514
INTS7	0.0582015	2.75929	2.70108	515
NPY1R	-0.5159	2.18484	2.70074	516
RARA	-1.9335	0.767176	2.70068	517
ZNRF4	-0.664732	2.03468	2.69941	518
CSNK2B	-1.08915	1.61026	2.69941	519
MINA	-0.147325	2.55199	2.69931	520
KIAA1467	-1.79639	0.902848	2.69923	521
PLXNA4	-1.22438	1.47325	2.69762	522
IKZF1	-1.15888	1.53621	2.69509	523
HTR3C	-1.56741	1.12718	2.69459	524
OTC	-1.37154	1.32281	2.69435	525
GPR65	-2.15226	0.541857	2.69412	526
ATP5A1	-1.46812	1.22574	2.69386	527
NUP37	-2.17921	0.514433	2.69365	528
SDF4	-1.20722	1.48597	2.69319	529
RASSF5	-0.30241	2.38956	2.69197	530
NT5E	-0.61312	2.07687	2.68999	531
FLT4	0.0879723	2.77696	2.68898	532
XIRP2	-1.17549	1.51161	2.6871	533
HOMER2	-1.10071	1.58625	2.68696	534
C22orf31	-3.6055	-0.918697	2.6868	535
CDK18	-0.832054	1.85444	2.68649	536
FAM26E	-2.53462	0.15151	2.68613	537
TERF1	0.0528361	2.73819	2.68536	538
ALPI	-0.927524	1.75664	2.68416	539
SPSB2	-1.47326	1.2104	2.68365	540
CCDC89	0.236802	2.92027	2.68347	541
PPP1R14D	-0.310657	2.37246	2.68312	542
MAPKAPK5	-2.16216	0.519945	2.6821	543
EPHA2	-1.43835	1.24241	2.68076	544
BCS1L	-1.46331	1.21579	2.6791	545
NAB2	-0.110325	2.56611	2.67643	546
CAMK2B	-1.11822	1.5562	2.67442	547
NUBPL	-0.162681	2.51147	2.67415	548
ZNF26	-1.37831	1.29313	2.67144	549
LNX2	-1.69209	0.971758	2.66385	550
GYPA	-0.487636	2.17533	2.66296	551
PPP2R2B	-3.77821	-1.11574	2.66247	552
NTRK2	-0.383603	2.27562	2.65922	553
GPBP1L1	-0.375757	2.28195	2.6577	554
APBB1	-0.815889	1.84029	2.65618	555
COL4A3BP	-1.55448	1.09375	2.64824	556
DPY30	-0.132059	2.51243	2.64449	557
CYLC1	-0.386376	2.25725	2.64363	558
RYBP	-2.83641	-0.194828	2.64159	559
PRDX4	0.3782	3.01922	2.64102	560
MCM2	-3.00901	-0.368094	2.64092	561
CLEC4E	-0.443066	2.19685	2.63992	562
TMEM67	-3.08025	-0.442222	2.63803	563
OPN4	-1.07953	1.55796	2.63749	564
DTNBP1	-0.519572	2.11753	2.63711	565
CRB3	-4.24129	-1.60508	2.63621	566
GLRA1	-0.369809	2.2661	2.6359	567
FRK	-0.712301	1.92293	2.63523	568
DEK	-1.34337	1.29055	2.63393	569
ASF1A	-1.25924	1.3733	2.63253	570
ORAI1	-0.996176	1.63585	2.63203	571
COLQ	-0.77332	1.85527	2.62859	572
CHST12	-0.694001	1.93412	2.62812	573
WDR54	-0.302053	2.3241	2.62615	574
LPAR5	-1.96808	0.65741	2.62549	575
PRKAR1A	-0.891618	1.73375	2.62537	576
PCDH20	-1.71856	0.906043	2.6246	577
MAST3	-3.51335	-0.889506	2.62385	578
C20orf85	-0.918041	1.70252	2.62056	579
SPIN1	-1.70383	0.916472	2.6203	580
HSPA8	-0.396154	2.22316	2.61931	581
PIFO	-0.506576	2.11207	2.61865	582
TMEM30A	-0.986746	1.6318	2.61854	583
TPK1	-0.811471	1.80648	2.61795	584
BAIAP2	-0.603879	2.01332	2.6172	585
LINC00298	-0.923034	1.69191	2.61494	586
MECP2	2.95972	5.57439	2.61467	587
GATAD2B	-3.05574	-0.443594	2.61214	588
COMT	-0.381205	2.2309	2.6121	589
PIK3IP1	-2.22045	0.39099	2.61144	590
ATP5F1	0.114419	2.72293	2.60851	591
CRYAB	-0.972768	1.63359	2.60636	592
GLRX3	1.02858	3.63285	2.60427	593
PPP1R12A	-0.244501	2.35909	2.60359	594
GK2	-1.20851	1.39386	2.60238	595
OR1S2	-0.924108	1.67773	2.60184	596
FAM212B	-1.0885	1.51266	2.60117	597
ORC6	-0.538279	2.06283	2.60111	598
CDK6	1.99757	4.59835	2.60079	599
LATS1	-0.58107	2.0183	2.59937	600
ATP1B1	-1.23047	1.36777	2.59824	601
TXN2	-0.733943	1.86316	2.5971	602
USP15	-1.7083	0.888531	2.59683	603
PMS1	-1.11727	1.47935	2.59663	604
HIST1H4H	-1.37753	1.21804	2.59557	605
CLEC10A	-0.0769238	2.5177	2.59462	606
RBM4	-0.619347	1.9716	2.59095	607
SLC4A3	-2.658	-0.0671859	2.59081	608
GTF2IRD2B	0.558181	3.14836	2.59017	609
TNK2	-0.749825	1.84034	2.59017	610
TARSL2	0.785184	3.37371	2.58852	611
TMPRSS13	-3.38825	-0.80209	2.58616	612
TMEM246	-2.11107	0.474487	2.58556	613
DUSP6	-1.28596	1.29782	2.58377	614
ZADH2	-1.08538	1.49495	2.58033	615
MFI2	-1.10881	1.46925	2.57806	616
SMAGP	-1.35686	1.22007	2.57692	617
EPHX1	-1.06891	1.50655	2.57546	618
GMEB1	-3.78662	-1.21117	2.57544	619
SSTR1	-0.320604	2.2511	2.5717	620
CDK18	-1.64879	0.922422	2.57121	621
SLC35D3	-1.16237	1.40871	2.57108	622
TFAP2A	-2.02113	0.549476	2.5706	623
TIMM8A	-2.60789	-0.0375556	2.57034	624
KLHDC4	-0.674408	1.89501	2.56942	625
ANGPTL2	-1.44423	1.12262	2.56685	626
THEG	-1.05838	1.50795	2.56633	627
NAA30	-1.46435	1.10169	2.56604	628
EPHB4	-0.634411	1.93145	2.56586	629
TKTL2	0.0830262	2.64877	2.56575	630
TRIB3	-1.77306	0.790759	2.56381	631
RFX3	-1.54478	1.01886	2.56364	632
RDH11	-0.759539	1.80355	2.56309	633
N4BP2L2	-0.419397	2.14308	2.56248	634
FGF17	0.335812	2.89762	2.56181	635
RAB31	0.375106	2.93612	2.56101	636
DRD1	-1.24619	1.31457	2.56076	637
PHB2	-2.18461	0.375011	2.55962	638
PSMD13	-1.25723	1.30153	2.55876	639
GRPEL2	-0.979405	1.57826	2.55766	640
KCNG4	-1.10862	1.44854	2.55716	641
FBXO9	-0.812344	1.74406	2.55641	642
NR1H2	-0.824629	1.73076	2.55539	643
BBOX1	-0.796346	1.75854	2.55489	644
DZIP1	-1.15618	1.39848	2.55466	645
ZNF44	-0.336706	2.2179	2.5546	646
TMEM8B	-0.78977	1.76277	2.55254	647
NR4A2	-3.30203	-0.749589	2.55244	648
CYB5R2	-1.08258	1.46889	2.55147	649
RIOK2	-0.630724	1.9205	2.55122	650
RAD23B	-0.923618	1.62594	2.54955	651
SLC25A2	-1.09846	1.45073	2.54919	652
CAPZB	-1.35968	1.18917	2.54885	653
CCDC17	-0.710126	1.8387	2.54883	654
TOMM70A	-0.769897	1.77689	2.54679	655
MTAP	-0.842076	1.70462	2.5467	656
GABRB2	-1.19211	1.3532	2.54531	657
FAM221A	-0.688112	1.85625	2.54437	658
PSMA5	-0.360837	2.18106	2.5419	659
KLK7	-0.691084	1.84747	2.53856	660
PRSS50	-1.50839	1.0281	2.53649	661
ID1	1.38963	3.92592	2.53628	662
ARL15	-0.882626	1.65366	2.53628	663
RTCB	-1.9759	0.560043	2.53594	664
UBE2J1	-0.775113	1.76044	2.53556	665
CDCA4	-3.52024	-0.985777	2.53446	666
NSMF	-0.485854	2.04778	2.53364	667
CD276	-1.14074	1.38851	2.52924	668
SPINK2	-1.4017	1.12584	2.52754	669
UBALD1	-3.51844	-0.992477	2.52596	670
FLT3	-1.25073	1.27365	2.52438	671
LRRCC1	-2.40722	0.116984	2.52421	672
GPN2	-0.463229	2.06088	2.52411	673
PABPC5	-0.236449	2.28683	2.52328	674
CES1	-0.739815	1.78112	2.52094	675
MORN4	-1.14236	1.37782	2.52018	676
GPR19	-0.43832	2.08159	2.51991	677
TEC	-2.92642	-0.40746	2.51896	678
RDH12	-0.42244	2.09622	2.51866	679
MED21	-0.745846	1.77013	2.51597	680
PLCL2	-1.84724	0.667721	2.51496	681
AGA	-0.716299	1.79819	2.51449	682
SLCO1B3	-0.27538	2.23861	2.51399	683
KCNK2	-1.66941	0.842613	2.51203	684
ZCCHC11	0.253601	2.76226	2.50865	685
ZCCHC5	-1.32799	1.18022	2.50822	686
NUDT11	-0.789855	1.71819	2.50805	687
ABCF3	-1.34487	1.16197	2.50684	688
DRD5	-1.26806	1.23803	2.50609	689
UPRT	-1.08281	1.42305	2.50586	690
IL11	-0.14716	2.35729	2.50445	691
DARS	-1.0858	1.41788	2.50368	692
ZSCAN29	-1.14884	1.35474	2.50358	693
SUB1	-0.155628	2.3476	2.50323	694
LOC219872	-0.834382	1.66883	2.50321	695
MAPT	-3.00805	-0.505184	2.50287	696
ZNF268	-3.12621	-0.625401	2.50081	697
ACSM1	-1.20311	1.2973	2.50041	698
ARPP19	-1.09587	1.40449	2.50036	699
PRPS2	-0.770933	1.72871	2.49964	700
CREB1	-3.02213	-0.522825	2.49931	701
EGLN2	-0.487164	2.01143	2.49859	702
ZNF80	-0.879942	1.61726	2.4972	703
OTX2	-2.63589	-0.139286	2.4966	704
LCA5	-2.50924	-0.0130968	2.49614	705
OR52B2	-1.68067	0.814415	2.49508	706
GPR119	-1.77697	0.717806	2.49478	707
RSPH1	-0.657791	1.83663	2.49442	708
SHC4	-1.22058	1.27111	2.4917	709
ADCK2	-0.775482	1.71459	2.49008	710
FGF7	-0.427638	2.0615	2.48914	711
FGFR4	-0.463584	2.02423	2.48781	712
BDH1	-1.528	0.959472	2.48747	713
NKAP	-0.548123	1.93858	2.4867	714
SPOPL	-2.40518	0.0770955	2.48228	715
TATDN1	-0.994294	1.48708	2.48138	716
SMAD2	-0.761176	1.71981	2.48099	717
C17orf51	0.0229636	2.50391	2.48095	718
RBMY1F	-2.12342	0.356277	2.4797	719
CST5	-0.851467	1.62767	2.47914	720
USP3	0.0080417	2.48619	2.47814	721
TCF19	-0.878489	1.59809	2.47658	722
KLHL10	-2.11179	0.364649	2.47644	723
ANKS6	-0.84563	1.62863	2.47426	724
CENPBD1P1	0.122291	2.5957	2.47341	725
ORM2	-0.696786	1.7746	2.47139	726
MFN1	-0.78829	1.68303	2.47132	727
NUAK1	-2.0693	0.401965	2.47126	728
TRPC1	-0.580571	1.88999	2.47056	729
TMEM120A	0.463092	2.93217	2.46908	730
RPL21	-1.26543	1.20355	2.46898	731
KLF12	-4.42615	-1.9576	2.46855	732
PTPN2	0.353385	2.82193	2.46854	733
PITX2	-3.41794	-0.949688	2.46825	734
WWP2	-1.96728	0.499762	2.46704	735
MRPL3	0.00243247	2.46889	2.46646	736
RCAN1	-0.895007	1.5712	2.46621	737
CRCP	-1.08033	1.3841	2.46444	738
RBM25	-2.25485	0.209201	2.46406	739
PDLIM3	0.161125	2.62302	2.46189	740
EIF4E3	-0.675588	1.78577	2.46135	741
KCND2	0.423218	2.88311	2.45989	742
TOR3A	-0.555552	1.90369	2.45924	743
GPR128	0.818479	3.27661	2.45813	744
PSKH1	-0.311572	2.14507	2.45664	745
PQBP1	-1.04459	1.4112	2.45578	746
ADRB2	-1.83942	0.616292	2.45571	747
PAAF1	-1.35859	1.09642	2.455	748
IRAK4	-1.84811	0.606757	2.45487	749
PPOX	-1.548	0.905375	2.45338	750
C8orf31	-0.799347	1.65312	2.45247	751
CDK14	-0.557157	1.89493	2.45209	752
C19orf43	-1.16839	1.28346	2.45186	753
MAP3K2	-2.22419	0.227647	2.45184	754
RANBP3L	-0.648053	1.80231	2.45036	755
RRAGA	-0.601601	1.84676	2.44836	756
SSSCA1	-0.231791	2.21588	2.44767	757
CCL3L1	-0.7575	1.68867	2.44617	758
SDSL	-0.81126	1.63356	2.44482	759
LOC390877	-0.592689	1.85169	2.44438	760
IGF2	-1.19038	1.25126	2.44164	761
PSMC5	-2.65133	-0.20988	2.44145	762
ZNF764	-1.12863	1.31036	2.439	763
VCAN	-1.45564	0.983195	2.43883	764
NSDHL	-1.45803	0.977213	2.43524	765
SIRT6	-1.33374	1.10066	2.43441	766
YWHAB	-0.0572477	2.37679	2.43403	767
TSPAN1	-0.983042	1.44924	2.43228	768
PDCD6IP	-0.226424	2.20511	2.43153	769
MT1M	-0.472867	1.95834	2.4312	770
USP14	-0.0796519	2.34986	2.42951	771
TMED5	-0.841262	1.58812	2.42938	772
AKAP14	-1.32138	1.10791	2.42929	773
CYLC2	-0.455722	1.97238	2.4281	774
RBM47	-3.04025	-0.612864	2.42738	775
GNB3	-1.05904	1.36778	2.42682	776
NEK10	-1.1911	1.23533	2.42643	777
PCYT1A	-1.07012	1.35543	2.42555	778
RELT	-1.01467	1.41018	2.42485	779
RPL4	-1.27497	1.14908	2.42405	780
PTH1R	-4.11853	-1.69494	2.42359	781
PPP1R2P3	-1.70923	0.713587	2.42282	782
NUSAP1	-0.690243	1.73216	2.4224	783
OPN5	-1.36976	1.05257	2.42233	784
RHBDL1	-0.377606	2.04437	2.42198	785
PEAK1	-0.686269	1.7355	2.42177	786
SLC10A1	-1.61966	0.801157	2.42082	787
ADCK1	-0.201382	2.2158	2.41718	788
CDK15	-0.95321	1.46328	2.41649	789
TAAR1	-0.271897	2.14398	2.41588	790
SLC18A3	-2.61053	-0.196526	2.41401	791
PPP1R15A	-1.81105	0.602559	2.41361	792
SRSF11	-1.63044	0.782271	2.41271	793
OPN4	-1.18459	1.22755	2.41214	794
RGS20	-0.439551	1.97234	2.41189	795
GDAP2	1.34129	3.75317	2.41188	796
TTK	-0.441097	1.9699	2.41099	797
C10orf126	-1.67461	0.734464	2.40907	798
PIM1	-1.99617	0.410618	2.40679	799
CDC7	-1.59717	0.805823	2.40299	800
HLA-C	-0.824718	1.57406	2.39878	801
FAM90A1	-1.04864	1.3493	2.39794	802
SUMF2	-1.47909	0.918268	2.39736	803
AMACR	-1.01026	1.38681	2.39707	804
FGFR1	-0.102422	2.29176	2.39418	805
ZNF214	-0.999192	1.3946	2.39379	806
DYRK4	-2.12491	0.268313	2.39323	807
LRRC48	-0.436207	1.95585	2.39205	808
TNKS2	-0.942562	1.44857	2.39113	809
SIRT7	-0.791974	1.59847	2.39044	810
EFCAB3	-1.27885	1.11091	2.38977	811
CA5A	-1.26419	1.12003	2.38423	812
PRSS38	-0.685335	1.69801	2.38334	813
SLC28A1	-0.1966	2.18213	2.37873	814
TESK2	-2.03833	0.339721	2.37805	815
CHGB	-1.33377	1.04208	2.37586	816
DNM1P34	-0.741708	1.63392	2.37562	817
NANOGP8	-1.95216	0.42268	2.37484	818
RASGRP2	-0.384102	1.98962	2.37372	819
PTGER3	-0.908614	1.46495	2.37357	820
ADCK1	-1.51589	0.856883	2.37277	821
ALK	-1.40171	0.967692	2.36941	822
PHC3	-0.568733	1.79966	2.36839	823
RRM2	-0.530364	1.83782	2.36819	824
HIST2H2BE	-0.777234	1.59083	2.36806	825
RPS20	-0.795931	1.57194	2.36787	826
C19orf70	-0.61061	1.7569	2.36751	827
C5AR2	-1.92628	0.439935	2.36622	828
RNF34	-1.69851	0.667507	2.36602	829
TFR2	0.4098	2.77573	2.36593	830
TIMP3	-0.190093	2.17559	2.36568	831
P4HA2	-1.32331	1.04137	2.36468	832
CYP4A22	-0.747963	1.61643	2.36439	833
WBP1	-2.94777	-0.584652	2.36312	834
CALHM1	-3.84582	-1.48501	2.3608	835
TMED5	-0.705543	1.65504	2.36059	836
SLC29A3	-0.435905	1.92445	2.36036	837
FKBPL	-0.369621	1.99059	2.36022	838
ASB17	-1.04218	1.31801	2.36019	839
PSME4	-1.15853	1.19777	2.3563	840
HBG1	-0.305563	2.05049	2.35605	841
ILVBL	-0.743114	1.61161	2.35473	842
PDGFRB	-2.8582	-0.504529	2.35367	843
LYN	-2.5729	-0.219422	2.35348	844
IQCF3	-0.101945	2.25127	2.35321	845
DHX57	-1.30803	1.04482	2.35285	846
METTL20	0.377712	2.73001	2.3523	847
RAB32	-0.810906	1.5413	2.3522	848
NGEF	0.600332	2.9507	2.35036	849
TRAF4	-0.868156	1.482	2.35015	850
SRSF10	-1.67461	0.674105	2.34872	851
CD274	-0.0243533	2.32322	2.34758	852
SAA1	-0.511551	1.83588	2.34743	853
SLC22A5	-0.578435	1.76818	2.34661	854
RNF5	-1.36929	0.977246	2.34653	855
TMEM59	-0.729275	1.61424	2.34352	856
C1orf228	-0.293	2.05051	2.34351	857
HPGD	-1.2866	1.05668	2.34328	858
RBM26	-0.434509	1.90753	2.34204	859
TMEM129	-0.964622	1.37651	2.34114	860
STAT3	-2.9757	-0.635022	2.34068	861
ZNF645	-2.77024	-0.429885	2.34035	862
DNTTIP2	-0.590827	1.7491	2.33992	863
SLC22A11	-0.552596	1.78725	2.33984	864
CCDC186	0.483849	2.82215	2.33831	865
CLK3	-0.501305	1.83516	2.33647	866
UPP2	-1.07869	1.25575	2.33444	867
LOC100129532	-0.551809	1.78226	2.33407	868
CLEC4A	-0.720445	1.61332	2.33376	869
WDR41	-0.606789	1.72462	2.33141	870
DECR2	-0.474757	1.85434	2.3291	871
IFT81	-0.489354	1.83696	2.32632	872
TAS2R20	-0.407546	1.91404	2.32158	873
TBC1D2	-1.18334	1.13779	2.32113	874
MPPED1	-1.73791	0.58316	2.32107	875
PAK4	-0.887768	1.43232	2.32009	876
PLXNA2	-0.394999	1.92466	2.31966	877
CNNM3	-0.433017	1.88641	2.31943	878
COX17	-0.194432	2.12405	2.31848	879
PPP1CC	-1.70815	0.609987	2.31814	880
TNFRSF14	-1.20184	1.11568	2.31752	881
MTERF1	-0.725494	1.59113	2.31663	882
RCN3	-0.469699	1.84652	2.31622	883
RFC1	-0.350549	1.96548	2.31603	884
CHCHD4	-1.64725	0.668078	2.31533	885
SULT6B1	-1.29638	1.01869	2.31507	886
PLP1	-0.85828	1.45646	2.31474	887
CSNK1E	-0.879141	1.43328	2.31242	888
IFNA21	-0.921938	1.38973	2.31167	889
RHBDD1	-1.46221	0.848156	2.31037	890
LCN1	-0.996446	1.31279	2.30923	891
CLEC1A	-2.15821	0.15033	2.30854	892
DDX19B	-0.533599	1.7745	2.3081	893
LACE1	-0.196908	2.11107	2.30798	894
MDM4	2.06906	4.37651	2.30745	895
CBWD6	-1.03579	1.27078	2.30657	896
NLN	-1.5333	0.772903	2.3062	897
CPNE4	-0.379393	1.92594	2.30533	898
STRADA	-0.625432	1.67756	2.303	899
FYN	-0.831771	1.47103	2.3028	900
PIM2	-0.751187	1.55153	2.30272	901
RDM1	-0.647776	1.65466	2.30244	902
GPS2	-1.91786	0.384505	2.30236	903
MSN	-0.856401	1.44359	2.29999	904
BRD2	-1.65113	0.648479	2.29961	905
DDX49	-1.88588	0.412948	2.29882	906
MYO5C	-0.212067	2.08608	2.29815	907
LDLRAD4	-0.707222	1.59032	2.29755	908
C19orf54	-0.413332	1.8831	2.29643	909
SREK1	-0.741568	1.55447	2.29604	910
ZNF101	-0.64044	1.65548	2.29592	911
SMARCD1	-1.88403	0.411238	2.29526	912
LOC102724334	-0.62256	1.6716	2.29416	913
WNT9A	1.54608	3.83926	2.29318	914
TM7SF3	0.604626	2.89655	2.29193	915
UGT2B7	-0.243889	2.0454	2.28929	916
MLKL	-1.53251	0.756249	2.28876	917
CCDC107	-0.598515	1.68879	2.28731	918
SRP54	0.0951937	2.38228	2.28708	919
SLC43A3	-1.29521	0.99127	2.28648	920
RPS14	-0.0647262	2.22096	2.28569	921
CLIC1	0.487012	2.77201	2.28499	922
SIK2	-2.49811	-0.213333	2.28477	923
LOC399886	1.25306	3.5377	2.28464	924
LDLR	-4.72719	-2.44258	2.28461	925
GPBP1	0.551773	2.83636	2.28459	926
PAIP2	-1.53594	0.746894	2.28284	927
MAFK	-1.0461	1.23561	2.28171	928
CD8B	-1.43304	0.848005	2.28104	929
MYLK3	-0.739326	1.54137	2.2807	930
SCARB2	-1.21436	1.0661	2.28046	931
TMEM120A	-0.469702	1.80989	2.2796	932
TRMT6	1.88837	4.16739	2.27903	933
MRFAP1	-0.80212	1.47646	2.27858	934
FAM208A	-0.876104	1.40216	2.27826	935
LRG1	-1.28393	0.992616	2.27654	936
UHMK1	-0.541948	1.73437	2.27632	937
PTH2R	-1.11108	1.16321	2.27429	938
DPM2	-1.01478	1.2595	2.27428	939
C9orf163	-1.86888	0.404749	2.27363	940
PKDCC	-0.617402	1.6559	2.2733	941
PLAC8	-0.684865	1.58675	2.27161	942
TSPO	-0.482273	1.78847	2.27074	943
PRIM1	-0.493646	1.77654	2.27019	944
ZIC1	-2.95122	-0.681089	2.27013	945
THAP4	-0.696634	1.57311	2.26975	946
OR2B3	-2.05714	0.211972	2.26911	947
NDUFV2	-1.07607	1.19281	2.26888	948
DEDD2	-0.098555	2.16997	2.26853	949
PLEKHA8	-0.341651	1.92603	2.26768	950
FABP12	-0.866788	1.40031	2.2671	951
TRPC4AP	0.177258	2.44409	2.26683	952
NTRK3	-0.622214	1.64413	2.26634	953
SERPINB10	-0.910044	1.3524	2.26244	954
NUMB	-1.83964	0.422118	2.26176	955
MKNK1	-0.99344	1.26813	2.26157	956
SLC22A1	-0.0610805	2.19802	2.2591	957
COQ5	-0.239617	2.019	2.25861	958
NKAPL	-0.925101	1.33329	2.25839	959
METTL9	-1.06204	1.19555	2.25759	960
RPL10A	-0.273974	1.98328	2.25725	961
ADSSL1	-0.865909	1.38986	2.25577	962
NKIRAS2	-1.2588	0.996694	2.2555	963
ASTN2	0.0358572	2.29067	2.25482	964
ZNF781	-1.74526	0.509235	2.2545	965
MAS1	-0.163813	2.09057	2.25439	966
KRTAP10-11	-1.59379	0.659784	2.25358	967
RARG	0.0510769	2.30366	2.25258	968
ZNF326	-0.414539	1.83686	2.2514	969
NR1D1	-1.33849	0.912695	2.25118	970
HEBP2	-0.801269	1.44901	2.25028	971
BRCC3	-0.516764	1.73272	2.24948	972
BFSP1	-2.30556	-0.0560746	2.24948	973
MRGPRE	-0.400487	1.84801	2.2485	974
RSBN1L	-2.05392	0.194078	2.24799	975
CACNG2	-0.712642	1.53403	2.24667	976
KCNJ11	-0.884769	1.36151	2.24627	977
UVSSA	-1.41161	0.833825	2.24543	978
GCLC	-1.52226	0.721742	2.244	979
SUZ12	-1.82248	0.421218	2.2437	980
C3orf52	-0.240191	2.00208	2.24228	981
FIBP	-0.273456	1.96762	2.24108	982
SULT4A1	-0.712937	1.52797	2.24091	983
IGLL5	-0.13044	2.10979	2.24023	984
SUN5	-1.42037	0.819854	2.24022	985
CRISP2	-1.04275	1.19652	2.23927	986
NAA15	-1.43687	0.802388	2.23926	987
VILL	-3.39512	-1.15597	2.23915	988
CSNK1G1	-2.65174	-0.412803	2.23894	989
DGUOK	-0.292954	1.9458	2.23875	990
AGGF1	-0.429402	1.80832	2.23772	991
GAPDH	-1.0221	1.21512	2.23722	992
FGFR3	-1.66296	0.574228	2.23719	993
NHLH2	-1.61264	0.624225	2.23687	994
LPAR4	-1.65171	0.584422	2.23613	995
KU-MEL-3	-0.339844	1.89437	2.23421	996
SPEM1	-0.286059	1.94717	2.23323	997
TOR1AIP2	-0.974071	1.2582	2.23227	998
STK17B	-1.30719	0.92403	2.23122	999
NFYC	0.264582	2.49536	2.23078	1000
AQP4	-0.86127	1.36919	2.23046	1001
PCDHGB5	-1.19414	1.03589	2.23003	1002
PTGER3	-0.756093	1.47378	2.22987	1003
HIST1H2BD	-0.606586	1.62193	2.22851	1004
SLC14A2	-1.20385	1.02466	2.22851	1005
AVPR2	-1.20812	1.01934	2.22746	1006
ZBTB21	-0.942448	1.28421	2.22666	1007
DDX23	-1.09723	1.12928	2.22651	1008
CLEC4F	-0.17756	2.04689	2.22445	1009
CHRNA4	-1.42616	0.797937	2.2241	1010
MC1R	-2.78358	-0.565929	2.21765	1011
IL4	0.378756	2.59573	2.21697	1012
NUAK2	-1.37616	0.840398	2.21656	1013
ZSCAN2	-1.20845	1.00805	2.2165	1014
JUP	-0.104039	2.1119	2.21594	1015
PSTK	-0.598586	1.61679	2.21537	1016
SPEG	-0.703139	1.51135	2.21449	1017
SERPINB13	-1.23382	0.978402	2.21222	1018
AEN	-1.0329	1.1766	2.2095	1019
ZNF496	-2.73286	-0.523849	2.20901	1020
ZNF449	-1.58493	0.622586	2.20751	1021
WNT3A	0.665724	2.87241	2.20669	1022
GSDMB	-1.84921	0.354815	2.20403	1023
CREBRF	-0.898894	1.30471	2.20361	1024
C17orf75	-0.0200659	2.18225	2.20231	1025
LMAN2L	0.088955	2.29056	2.20161	1026
CALHM2	-0.363724	1.83458	2.19831	1027
RARA	-2.29382	-0.0960283	2.19779	1028
PCMTD1	-0.306648	1.89111	2.19776	1029
KCTD21-AS1	-0.706708	1.4832	2.18991	1030
DAOA	-0.481248	1.7076	2.18885	1031
PPP3CB	-1.85596	0.33243	2.18839	1032
COL5A1	-0.630161	1.55809	2.18825	1033
DPYSL3	-1.17723	1.0103	2.18754	1034
TSSK3	-2.96749	-0.781408	2.18609	1035
CNP	-1.1805	1.00547	2.18598	1036
EGFL7	-0.663159	1.52278	2.18593	1037
ACP6	-0.641076	1.54352	2.18459	1038
CYB5A	-0.780755	1.40061	2.18136	1039
METTL21A	-0.617114	1.56317	2.18029	1040
SYT4	-0.299149	1.88104	2.18018	1041
TRIM16L	-0.123672	2.0563	2.17997	1042
C10orf25	-0.911242	1.26806	2.1793	1043
FGF8	-0.605199	1.57274	2.17794	1044
MAP4K3	-1.43811	0.739292	2.17741	1045
OXER1	-0.617543	1.55932	2.17687	1046
STAM2	-2.02762	0.148894	2.17651	1047
DCAF11	-0.834607	1.34001	2.17462	1048
CCR5	-0.268284	1.90499	2.17328	1049
SUN3	-0.904903	1.26793	2.17283	1050
CALN1	-0.923519	1.24912	2.17264	1051
LETM2	0.0144545	2.18657	2.17211	1052
RIPK2	-1.514	0.657455	2.17145	1053
KLHL12	0.586018	2.75673	2.17071	1054
C21orf33	-1.06366	1.10544	2.16909	1055
TRIAP1	-0.864015	1.30362	2.16764	1056
GPR61	-0.374519	1.79297	2.16749	1057
CATSPER4	-0.316749	1.84904	2.16579	1058
APBB3	-0.548753	1.61695	2.1657	1059
UCK2	-0.656036	1.50923	2.16527	1060
PRR23B	-4.57238	-2.40815	2.16423	1061
CERS4	-1.51874	0.644416	2.16315	1062
FGF1	-0.599138	1.56388	2.16302	1063
TIGD5	-0.396999	1.76541	2.16241	1064
REPS1	-1.4569	0.704433	2.16134	1065
ELK1	-3.07796	-0.917643	2.16031	1066
FN3KRP	-0.120624	2.039	2.15962	1067
EMP1	-0.325454	1.83262	2.15807	1068
PRKACB	-0.124155	2.033	2.15716	1069
RYBP	-2.05433	0.102365	2.15669	1070
FTHL17	-0.36918	1.78727	2.15645	1071
EGFR	-2.19323	-0.0373221	2.15591	1072
ATRNL1	-0.284608	1.87116	2.15577	1073
PSG9	-0.83977	1.31317	2.15294	1074
TRIM31	-0.989256	1.16345	2.1527	1075
IGHV4-31	-1.27643	0.874789	2.15122	1076
RIPK2	-0.856797	1.29284	2.14964	1077
DCAF4	-0.110597	2.03867	2.14926	1078
MPPE1	-0.763418	1.38521	2.14863	1079
ZNF680	0.0991902	2.24745	2.14826	1080
ALKBH3	-0.212993	1.93501	2.148	1081
CYP1B1	-0.60718	1.54065	2.14783	1082
NEK3	0.398814	2.54642	2.14761	1083
BCL7A	-0.87789	1.26887	2.14676	1084
XRCC4	-0.271643	1.8741	2.14574	1085
PFN1	-0.821681	1.32372	2.1454	1086
SARDH	-1.54874	0.595954	2.14469	1087
PHKG1	-2.15645	-0.0120825	2.14437	1088
ID3	1.26872	3.41232	2.14359	1089
UCHL1	-0.46635	1.67606	2.14241	1090
DNAJC6	-1.04727	1.09507	2.14234	1091
PCYOX1	0.607786	2.74988	2.14209	1092
H1FOO	-0.793921	1.34692	2.14084	1093
SF3B4	-1.78418	0.35636	2.14054	1094
DBNL	-1.10681	1.03259	2.1394	1095
SKP2	-0.593925	1.54466	2.13858	1096
USP2	0.588221	2.72675	2.13853	1097
TTC30B	-1.22231	0.915396	2.1377	1098
AUP1	-1.28887	0.847005	2.13587	1099
HOXA6	-3.29258	-1.15816	2.13442	1100
ZNF175	0.211961	2.34559	2.13363	1101
DEFA6	-0.400526	1.73185	2.13237	1102
KLHL26	-0.398342	1.73394	2.13228	1103
NTRK2	1.30334	3.4351	2.13176	1104
MRPL51	-0.537065	1.59443	2.13149	1105
TCEANC2	-0.80441	1.3265	2.13091	1106
POLD3	-0.702341	1.42786	2.13021	1107
RSL24D1	-2.9081	-0.779675	2.12843	1108
KDM4B	-0.871782	1.25652	2.1283	1109
CPA2	0.114098	2.24178	2.12769	1110
RNLS	-0.151189	1.97596	2.12715	1111
KRTAP10-3	-2.27516	-0.1482	2.12696	1112
SERPINB1	-0.990424	1.13575	2.12617	1113
PPIG	-1.24413	0.881787	2.12591	1114
LSP1	-1.03256	1.09205	2.12461	1115
ZNF252P-AS1	0.145383	2.26959	2.1242	1116
LIAS	-0.883271	1.23842	2.12169	1117
SIRT6	0.868013	2.98891	2.1209	1118
ACVR1	0.0100388	2.12911	2.11908	1119
SCGB1D2	-0.689786	1.42898	2.11877	1120
EFHC1	0.00366632	2.12223	2.11856	1121
DHX38	1.09465	3.21321	2.11856	1122
IL1RAPL2	-0.0658484	2.0523	2.11815	1123
CYBRD1	-0.751146	1.36639	2.11753	1124
CCNC	-1.24688	0.870594	2.11747	1125
LZTS2	-0.36295	1.754	2.11695	1126
TFE3	-2.65795	-0.542865	2.11509	1127
TTLL2	-1.17121	0.942658	2.11386	1128
UTP11L	-0.436403	1.67739	2.1138	1129
RPL5P34	-1.34356	0.769636	2.11319	1130
TNFSF18	-0.434248	1.67874	2.11299	1131
ZIK1	-1.15354	0.958325	2.11187	1132
TCF7	-2.31908	-0.209501	2.10958	1133
IP6K2	-1.85442	0.25365	2.10807	1134
MYL2	0.865556	2.97228	2.10672	1135
AKIRIN2	-2.02108	0.0853807	2.10646	1136
DDI1	-0.891602	1.21355	2.10515	1137
DGKB	-1.92575	0.178846	2.10459	1138
TYW3	-0.869131	1.23533	2.10446	1139
FAM60A	-0.392381	1.71192	2.1043	1140
TACR1	-0.479095	1.62493	2.10403	1141
CAMKK1	-0.940173	1.16354	2.10371	1142
FGFR2	-1.08798	1.01525	2.10323	1143
DGKG	-0.652537	1.45066	2.1032	1144
C1QTNF9B	-1.21862	0.884245	2.10287	1145
IL23A	-0.586156	1.51649	2.10264	1146
MRPS24	-0.72818	1.37369	2.10187	1147
MTMR9	-0.687322	1.41429	2.10161	1148
CA5B	-0.965388	1.13585	2.10124	1149
FBXL16	-1.56311	0.537943	2.10105	1150
WBP11	-0.593742	1.50666	2.1004	1151
ALX1	3.37926	5.47954	2.10028	1152
SENP2	0.27833	2.37649	2.09816	1153
SLC4A8	-1.59816	0.499612	2.09777	1154
CAMKK1	-0.827378	1.27004	2.09742	1155
PDE4DIP	-1.46777	0.629173	2.09694	1156
SUMO2	-0.266629	1.82961	2.09624	1157
MSH5	-1.1572	0.938474	2.09567	1158
SPTSSA	-0.93871	1.1567	2.09541	1159
IL17A	-1.82975	0.26565	2.0954	1160
MRPL52	-0.511009	1.58426	2.09527	1161
MEOX2	-1.58842	0.506147	2.09457	1162
NARS2	-0.795131	1.29799	2.09313	1163
TCP10	-0.452515	1.6391	2.09161	1164
GPR148	-0.561681	1.52979	2.09147	1165
MYLK	-0.0409637	2.04975	2.09071	1166
SCTR	-1.89866	0.189226	2.08789	1167
DDX1	-1.13244	0.955245	2.08769	1168
PDE4DIP	-0.977142	1.11019	2.08733	1169
CXCR5	-1.44715	0.637821	2.08497	1170
C1D	-0.74001	1.34406	2.08407	1171
RNF114	-1.5007	0.582957	2.08366	1172
PGRMC1	-0.746765	1.33661	2.08337	1173
FBXL12	-1.81159	0.270821	2.08241	1174
OR5C1	0.560219	2.64197	2.08175	1175
WDR33	0.140982	2.22273	2.08175	1176
REG3G	-0.553326	1.5275	2.08082	1177
LRFN4	-0.971024	1.1075	2.07852	1178
GRM2	-1.01309	1.06465	2.07773	1179
CD28	-0.577295	1.5002	2.07749	1180
SSH2	-0.232273	1.84485	2.07713	1181
MAN1B1	-0.944648	1.13244	2.07709	1182
RHOC	-0.857704	1.21922	2.07692	1183
TMEM51	-2.77995	-0.703214	2.07674	1184
DDX27	-1.95836	0.11717	2.07553	1185
NFE2L2	-2.82595	-0.750898	2.07505	1186
TUFM	-1.72813	0.346823	2.07496	1187
TRIM52	-1.34857	0.725745	2.07432	1188
KIAA0125	1.15239	3.22551	2.07313	1189
KANSL1L	-2.51379	-0.441884	2.0719	1190
MYH7B	-0.0669098	2.00293	2.06984	1191
DTX3L	0.045794	2.11528	2.06949	1192
IGHA1	-0.887867	1.18137	2.06924	1193
DUSP14	-1.91958	0.149592	2.06917	1194
FOXJ1	-1.94694	0.121956	2.06889	1195
SLC9A3R2	-0.0503683	2.01839	2.06875	1196
COL9A1	-1.24833	0.820325	2.06866	1197
STMN2	-0.654712	1.41255	2.06726	1198
C20orf166-AS1	-0.669042	1.39777	2.06681	1199
GNPDA1	-1.28316	0.783273	2.06644	1200
PSG2	-0.213664	1.85242	2.06608	1201
DDX39A	-1.12436	0.941031	2.0654	1202
CLCC1	0.503165	2.56601	2.06285	1203
LAMC1	-1.06119	1.00147	2.06266	1204
MROH8	-1.34541	0.716666	2.06207	1205
CCDC138	-0.392511	1.66942	2.06193	1206
PRAME	-0.793306	1.26745	2.06076	1207
SDHB	-0.694429	1.36601	2.06044	1208
CPM	-0.759074	1.30121	2.06028	1209
FAM219B	-0.568821	1.49068	2.0595	1210
OR2B2	-0.157706	1.90088	2.05859	1211
SLC52A1	-0.466607	1.59146	2.05806	1212
CHRM1	-0.813254	1.24448	2.05774	1213
MAN2B2	-1.29438	0.761428	2.0558	1214
SLC30A6	-0.7923	1.26334	2.05564	1215
LHX8	-2.87355	-0.817948	2.0556	1216
GPR116	-0.265723	1.78968	2.05541	1217
GRM4	-2.96059	-0.905323	2.05527	1218
MRPS18B	0.566938	2.62035	2.05341	1219
IFIT3	0.271876	2.32438	2.0525	1220
CCNA2	-0.374538	1.67671	2.05125	1221
ERVFRD-1	-0.434586	1.61463	2.04922	1222
SPATA6	-1.00285	1.0454	2.04825	1223
C1orf177	-0.160203	1.88722	2.04742	1224
NAB2	-2.3077	-0.260374	2.04732	1225
TMEM177	-2.66693	-0.622361	2.04456	1226
CPA4	0.122529	2.1665	2.04398	1227
BRD8	-1.81596	0.227768	2.04372	1228
GCM2	-2.70413	-0.663414	2.04072	1229
OR2A25	1.41264	3.45257	2.03994	1230
SHPK	-1.15366	0.885356	2.03901	1231
COA5	-0.143318	1.8948	2.03812	1232
PLXNA1	-1.1367	0.901334	2.03803	1233
CDKL2	-1.06202	0.975072	2.03709	1234
C3orf62	-0.2169	1.81974	2.03664	1235
CDH7	-1.74394	0.29195	2.03589	1236
WDR82	-1.81697	0.218409	2.03538	1237
DUSP14	-0.509648	1.5257	2.03535	1238
PCGF6	-0.99602	1.03636	2.03238	1239
SLC35A5	-1.57725	0.454754	2.03201	1240
IKZF2	-1.11954	0.911899	2.03144	1241
SLFN5	-1.65535	0.375267	2.03062	1242
NUAK2	-2.0377	-0.00748865	2.03021	1243
NOP10	-0.915314	1.11487	2.03018	1244
CLCN2	-1.01092	1.01844	2.02935	1245
CTDSP1	-2.66403	-0.635123	2.0289	1246
CT45A3	-1.42847	0.598479	2.02695	1247
FAXDC2	-0.560498	1.46496	2.02546	1248
HRH2	-2.68253	-0.658267	2.02426	1249
B4GALT3	-0.604496	1.41921	2.02371	1250
ATG14	-0.693633	1.32913	2.02276	1251
HMGA1	0.493985	2.5165	2.02251	1252
CHMP2A	-0.632452	1.38992	2.02237	1253
MAPK11	1.36309	3.38393	2.02084	1254
C20orf141	-0.501284	1.51888	2.02017	1255
CYB5R1	0.196037	2.21421	2.01818	1256
MAGEA9	-2.5417	-0.523596	2.01811	1257
FXN	-0.853177	1.16408	2.01726	1258
G3BP2	-1.86985	0.146879	2.01673	1259
CDKL1	-1.19901	0.817614	2.01662	1260
BTN2A1	-1.27653	0.739875	2.0164	1261
ILK	-0.736421	1.27666	2.01308	1262
TRAFD1	-1.59371	0.418973	2.01268	1263
SHBG	-0.536783	1.47574	2.01252	1264
WBP2NL	-0.382526	1.62849	2.01102	1265
CYP3A4	-1.28461	0.725767	2.01037	1266
DCAF12L2	-0.561223	1.4491	2.01032	1267
CRTC3	-1.06121	0.947998	2.00921	1268
RWDD2A	-0.900873	1.10771	2.00858	1269
TAAR8	-0.889538	1.11892	2.00846	1270
TCF25	-0.279889	1.7285	2.00839	1271
KLHL32	-1.30317	0.705195	2.00837	1272
KSR1	-1.46725	0.540319	2.00757	1273
CYP2A6	-0.574741	1.43241	2.00715	1274
LGALS3	-1.0035	1.00359	2.00709	1275
EXOC1	-2.24229	-0.23669	2.0056	1276
TMEM14C	-0.609433	1.39514	2.00457	1277
SDHD	-0.780537	1.22386	2.0044	1278
BCL7A	-1.77765	0.226447	2.0041	1279
LCK	-0.243998	1.75981	2.00381	1280
RXRA	-0.729526	1.27377	2.00329	1281
DTWD1	-0.0718047	1.92982	2.00163	1282
IL1RAP	-0.0463949	1.95485	2.00125	1283
RHBDL2	-0.40106	1.59979	2.00085	1284
SRSF9	-1.5389	0.458854	1.99775	1285
MAP2K3	-3.52505	-1.52817	1.99688	1286
RNF19A	-1.85869	0.13647	1.99516	1287
SCPEP1	-0.105973	1.88893	1.99491	1288
TBCC	-0.536298	1.45823	1.99453	1289
BBS10	0.451771	2.44577	1.994	1290
MEIS2	-3.33966	-1.3461	1.99356	1291
FAM199X	-0.568656	1.42427	1.99293	1292
CHEK1	-1.77038	0.222399	1.99278	1293
ZCCHC14	0.182031	2.1738	1.99177	1294
MAPK6	-1.33595	0.655786	1.99174	1295
ING5	-0.788132	1.20357	1.9917	1296
PART1	-0.742583	1.24899	1.99157	1297
NPSR1	-0.0225382	1.96733	1.98987	1298
TAS2R40	0.0949569	2.08433	1.98937	1299
NUDT12	0.253715	2.24207	1.98836	1300
MCM10	-0.148963	1.83933	1.98829	1301
ARF3	0.0937966	2.08179	1.98799	1302
SCGN	-1.18504	0.80218	1.98722	1303
TMEM214	-2.09349	-0.107364	1.98612	1304
MTG2	-1.27487	0.71102	1.98589	1305
CYP4F11	-0.613095	1.37202	1.98511	1306
RPS18P9	-0.766333	1.21804	1.98437	1307
AHNAK2	-1.11836	0.865393	1.98375	1308
MRPS11	-1.05086	0.931227	1.98208	1309
SULT2B1	-0.499663	1.48064	1.9803	1310
PDE6H	-0.335815	1.64352	1.97933	1311
RPL13AP3	-0.883973	1.09518	1.97916	1312
ZFP82	-0.899506	1.07813	1.97764	1313
GJD2	-0.61322	1.36389	1.97711	1314
ZWILCH	-0.142117	1.83497	1.97709	1315
FCHSD2	-1.20701	0.768001	1.97501	1316
MTMR7	1.76434	3.73863	1.97429	1317
NFIX	-0.62275	1.3515	1.97425	1318
RASL11A	-0.246923	1.72716	1.97408	1319
ZMIZ2	-2.21764	-0.244263	1.97338	1320
IDI1	1.5464	3.51966	1.97326	1321
ZG16	-0.930716	1.04174	1.97246	1322
MARK3	-0.0236328	1.94837	1.972	1323
RPP25	-0.989063	0.981564	1.97063	1324
TMEM129	-0.563318	1.40694	1.97025	1325
STK25	-0.859954	1.11017	1.97012	1326
SLC4A1AP	-0.000434461	1.96937	1.9698	1327
GPR62	-2.78311	-0.813495	1.96961	1328
PCDHB15	-0.248143	1.72116	1.9693	1329
TMEM82	-0.94287	1.0254	1.96827	1330
RSL1D1	1.34671	3.31489	1.96817	1331
IFIT5	0.35481	2.32264	1.96783	1332
HLA-C	-0.557019	1.40977	1.96679	1333
ITPRIP	-1.06679	0.899572	1.96636	1334
MYOG	-4.15307	-2.18711	1.96595	1335
ACVR1C	-1.85201	0.113206	1.96521	1336
AGPAT6	-0.359632	1.60506	1.96469	1337
HDAC6	-1.878	0.0865913	1.96459	1338
AOAH	-1.48278	0.48125	1.96403	1339
PARP6	-1.36125	0.602775	1.96403	1340
CNR2	-0.923918	1.03993	1.96385	1341
CORO2A	-0.657001	1.30573	1.96273	1342
AP3M1	-0.178245	1.7838	1.96205	1343
FABP5	-0.13517	1.82616	1.96133	1344
IFT57	-1.36898	0.592139	1.96112	1345
C11orf73	-0.634685	1.32574	1.96043	1346
AURKB	-0.278804	1.68139	1.9602	1347
EPHB3	-0.580996	1.37912	1.96012	1348
PRR3	-0.615261	1.34244	1.9577	1349
PCED1A	-0.347756	1.60992	1.95768	1350
ZNF718	-0.254636	1.70296	1.9576	1351
AHDC1	-0.610492	1.34673	1.95723	1352
PAQR8	-0.668322	1.28888	1.95721	1353
SYTL2	-0.201754	1.75202	1.95377	1354
DCAF4L2	-0.773645	1.17942	1.95306	1355
UMPS	0.22773	2.18074	1.95301	1356
TRMT61B	-1.79935	0.15325	1.9526	1357
PRPF3	0.33216	2.284	1.95184	1358
CHRNB2	-0.680274	1.27144	1.95172	1359
ZPBP2	0.464757	2.41636	1.9516	1360
M1AP	-0.772295	1.17851	1.9508	1361
FAM43A	-1.98026	-0.0305157	1.94975	1362
TCEAL8	-0.646079	1.30311	1.94919	1363
TNIP3	0.370336	2.3191	1.94876	1364
C8orf22	-1.19373	0.754611	1.94834	1365
TGM3	-0.45864	1.48939	1.94803	1366
NOL6	-0.803148	1.1446	1.94775	1367
HRH4	-0.536488	1.41094	1.94743	1368
CFAP52	-1.62782	0.317025	1.94485	1369
GSTA1	-1.31853	0.626284	1.94481	1370
IL7	0.371116	2.31541	1.94429	1371
COQ6	0.198223	2.14231	1.94409	1372
SLC9A8	-1.99335	-0.049644	1.94371	1373
AEN	-0.85496	1.08818	1.94314	1374
TMEM123	-0.80727	1.1357	1.94297	1375
NPL	-0.578609	1.36414	1.94275	1376
EMR3	-0.196741	1.74599	1.94273	1377
MRGPRX4	0.333418	2.27595	1.94253	1378
TCTE1	-0.892465	1.04893	1.9414	1379
TACR1	-0.523816	1.41744	1.94126	1380
GNS	-1.27322	0.66726	1.94048	1381
SGK2	-0.672188	1.26791	1.9401	1382
PIK3C3	-1.17392	0.765574	1.93949	1383
TMEM64	-1.08115	0.857446	1.9386	1384
RIOK3	-0.741588	1.19645	1.93804	1385
UPK3B	-0.187502	1.75053	1.93803	1386
ATP6V0A1	0.736543	2.67353	1.93699	1387
C11orf16	-0.213586	1.72296	1.93655	1388
C12orf76	-0.274667	1.66097	1.93564	1389
ERBB3	-1.71689	0.218338	1.93523	1390
PRPF19	-1.27366	0.661206	1.93487	1391
PTGFR	-0.615224	1.3196	1.93482	1392
KDELR1	-0.850475	1.08181	1.93228	1393
LUC7L	-1.8545	0.0768045	1.93131	1394
TSG101	-1.39758	0.533517	1.9311	1395
PNKD	-0.2856	1.64423	1.92983	1396
CHIC1	-0.343272	1.58615	1.92942	1397
SLC35F1	-2.0059	-0.0782694	1.92763	1398
KRTAP10-9	-2.21303	-0.286427	1.92661	1399
ASB10	-1.34341	0.581832	1.92524	1400
PMEPA1	-1.09978	0.824645	1.92443	1401
PRSS21	-0.192977	1.73142	1.9244	1402
ELOVL5	0.0269095	1.95101	1.9241	1403
MRPL2	-0.914091	1.00959	1.92368	1404
ZNF695	-0.841808	1.08043	1.92224	1405
OR2T4	-0.881723	1.0399	1.92162	1406
CD36	-0.333059	1.58815	1.9212	1407
CNNM4	-1.24753	0.673247	1.92078	1408
MAGEB10	-2.7533	-0.833179	1.92012	1409
TBC1D10B	-2.0692	-0.149827	1.91937	1410
RNF111	0.254609	2.16932	1.91471	1411
C7orf69	-0.926925	0.987688	1.91461	1412
TMEM168	-0.540531	1.37161	1.91214	1413
TBC1D2B	-0.74498	1.16607	1.91105	1414
HSD17B14	-0.490321	1.41935	1.90967	1415
EGFR	-2.8221	-0.912618	1.90948	1416
IDO1	-1.10399	0.804561	1.90855	1417
CCDC109B	-0.635839	1.27097	1.9068	1418
RPAIN	-1.04235	0.86405	1.9064	1419
GK	-0.123093	1.78329	1.90638	1420
TRIM21	0.973242	2.87927	1.90603	1421
CIPC	-0.696194	1.20873	1.90493	1422
ZNF800	-2.25472	-0.351636	1.90309	1423
LEO1	-0.108727	1.79389	1.90261	1424
DPH2	-0.0799964	1.82241	1.90241	1425
DUSP22	-1.04645	0.855942	1.90239	1426
MCOLN1	-1.02434	0.87792	1.90226	1427
TEX264	-2.02059	-0.118428	1.90216	1428
CLIC5	-1.05593	0.845942	1.90187	1429
CASC4	-0.7462	1.15551	1.90171	1430
STRIP1	-0.781796	1.11981	1.9016	1431
RPL7	-0.843345	1.05808	1.90143	1432
MFSD2A	-1.3094	0.590962	1.90036	1433
C11orf57	-1.80158	0.0980251	1.89961	1434
FRMD3	-0.660789	1.23781	1.8986	1435
IL12RB2	0.962326	2.86001	1.89768	1436
ACPP	-0.425097	1.4717	1.8968	1437
CCNL1	-2.81355	-0.917199	1.89635	1438
TPK1	0.0111259	1.90711	1.89598	1439
SAYSD1	-1.27239	0.623098	1.89548	1440
TRAPPC13	-0.407437	1.48739	1.89482	1441
SNAP47	-0.25325	1.64039	1.89364	1442
CRMP1	-1.07072	0.822791	1.89352	1443
PATE1	-0.486241	1.40661	1.89285	1444
0	-1.62005	0.272635	1.89268	1445
TRPC4	-0.259718	1.63169	1.89141	1446
PDXDC1	-0.742022	1.14912	1.89115	1447
RUVBL2	-1.37659	0.513433	1.89002	1448
SNX9	-0.0271556	1.8621	1.88926	1449
VPS35	-0.840505	1.04771	1.88821	1450
RPL7L1	-0.564051	1.32383	1.88788	1451
SRSF3	-2.12249	-0.234715	1.88778	1452
KIAA1683	-1.24445	0.643256	1.8877	1453
HDGFRP2	-1.59053	0.296761	1.88729	1454
HTR7	-2.30419	-0.417529	1.88666	1455
EFCC1	-0.745043	1.14146	1.88651	1456
NME3	-0.32544	1.56089	1.88632	1457
PYCRL	-1.00537	0.880805	1.88618	1458
GPBAR1	-3.63203	-1.7461	1.88592	1459
DYNC1I1	0.408634	2.29389	1.88526	1460
URB2	-1.76348	0.121713	1.88519	1461
ULBP1	-0.169121	1.71539	1.88451	1462
PPP2R2D	-1.45755	0.426144	1.8837	1463
FAIM3	-0.494054	1.38927	1.88332	1464
RBMX2	-0.00739355	1.87555	1.88294	1465
ABHD5	-0.872064	1.00976	1.88182	1466
POLR3D	-0.642103	1.23942	1.88152	1467
RHBDF2	-2.06356	-0.182073	1.88149	1468
CNDP1	-0.137757	1.74354	1.8813	1469
ACADS	-0.186177	1.69406	1.88024	1470
CLEC3B	-0.282405	1.59776	1.88017	1471
BOLA2	-0.723657	1.15531	1.87896	1472
RABL6	-1.00474	0.872963	1.8777	1473
AKT2	-3.71609	-1.83852	1.87756	1474
DYRK3	-4.6019	-2.72462	1.87728	1475
CD82	-0.353589	1.52355	1.87714	1476
PHKA2	-1.52503	0.351936	1.87696	1477
DEFB105A	-0.138046	1.73864	1.87669	1478
TNFRSF11B	0.233313	2.10993	1.87662	1479
MCTS1	-1.06906	0.807446	1.87651	1480
PTMA	-0.259229	1.61714	1.87637	1481
RASSF7	-0.24474	1.63124	1.87598	1482
FAM20B	-1.05538	0.81764	1.87302	1483
PGM5P1	-0.454112	1.41883	1.87295	1484
SEC23B	-0.18311	1.68938	1.87249	1485
KRT79	-1.66144	0.210483	1.87193	1486
CHID1	-0.185403	1.68609	1.87149	1487
GRAP2	-0.254564	1.61679	1.87135	1488
KIR2DL4	-0.525943	1.34408	1.87003	1489
LYSMD1	-0.264534	1.60533	1.86987	1490
RAPGEF4	-0.325883	1.54346	1.86934	1491
C8A	-0.935751	0.932035	1.86779	1492
NDUFV1	-0.892105	0.974939	1.86704	1493
CLEC14A	-1.3855	0.480074	1.86557	1494
APOBEC3F	-0.849194	1.01581	1.86501	1495
ECD	0.66941	2.53408	1.86467	1496
TBC1D22A	-0.125211	1.73857	1.86378	1497
SPERT	-0.573176	1.29059	1.86376	1498
TEKT3	-0.0495029	1.81412	1.86362	1499
PIGN	-0.465257	1.39791	1.86317	1500
ACYP1	-0.448544	1.41437	1.86291	1501
LHB	-0.961164	0.901619	1.86278	1502
FAM204A	-0.355472	1.50647	1.86194	1503
MAATS1	0.37009	2.23088	1.86079	1504
EGLN3	-0.332895	1.52729	1.86019	1505
GRM8	-0.465688	1.39416	1.85985	1506
SOX10	-0.353015	1.5065	1.85951	1507
LOC81691	-1.55986	0.29892	1.85878	1508
ZNF418	-1.68014	0.178293	1.85843	1509
KIF3A	0.624952	2.48282	1.85787	1510
COX10	-1.3068	0.550366	1.85717	1511
ARFIP2	-1.00912	0.846962	1.85608	1512
PALLD	-0.502478	1.35336	1.85584	1513
ASZ1	-0.262282	1.59309	1.85537	1514
USP54	-0.608386	1.24638	1.85476	1515
HTR3A	-1.0132	0.840507	1.8537	1516
DUSP19	-0.308349	1.54526	1.85361	1517
BTBD10	-1.70033	0.152387	1.85272	1518
ACKR3	-2.26774	-0.415821	1.85192	1519
C5orf58	0.117145	1.96839	1.85124	1520
EPM2AIP1	0.245981	2.09714	1.85116	1521
CD52	-0.147226	1.7036	1.85083	1522
PIGX	-0.883776	0.966753	1.85053	1523
ZNF181	-0.049457	1.80098	1.85044	1524
GPR119	-3.23173	-1.38204	1.8497	1525
HRSP12	-2.79433	-0.944711	1.84962	1526
HEPACAM2	-1.86143	-0.0122813	1.84915	1527
NIPAL1	0.12794	1.97688	1.84894	1528
MRPL4	-0.827212	1.02172	1.84893	1529
GRINA	-1.63619	0.212689	1.84888	1530
SPCS2	-0.739097	1.10972	1.84881	1531
GADD45B	-2.83798	-0.98988	1.8481	1532
TM2D1	-0.275019	1.573	1.84802	1533
HOMER2	-2.02442	-0.178537	1.84588	1534
HECTD3	-0.0340272	1.81164	1.84567	1535
RUNX1-IT1	-1.80454	0.0410459	1.84558	1536
AGTR1	-0.505634	1.33916	1.8448	1537
PLTP	-1.5038	0.340597	1.8444	1538
TPPP	-0.783521	1.06038	1.8439	1539
XPO6	-0.214902	1.62761	1.84252	1540
EEF2K	-0.726745	1.1147	1.84144	1541
SLC34A1	-0.815106	1.02575	1.84086	1542
CSNK1E	-1.54453	0.295691	1.84022	1543
GPN2	-1.06863	0.769914	1.83855	1544
TDGF1	-0.587132	1.25096	1.83809	1545
MAPK1	-0.292682	1.54511	1.83779	1546
SGK2	0.497982	2.33571	1.83772	1547
SPINT2	-0.506114	1.33069	1.83681	1548
ZMYM1	-1.15563	0.681114	1.83675	1549
DZANK1	-0.327257	1.50886	1.83612	1550
DAND5	-0.617026	1.21904	1.83607	1551
DYDC2	-0.103282	1.73271	1.83599	1552
CLRN1	-0.405585	1.43023	1.83582	1553
CCDC17	-0.850701	0.984017	1.83472	1554
PAPL	-0.426401	1.4083	1.8347	1555
PRKAB1	-0.239533	1.5941	1.83363	1556
MOS	-0.649065	1.18368	1.83274	1557
HAT1	-1.75985	0.0724695	1.83232	1558
ZDHHC1	-1.50412	0.32769	1.83181	1559
LRRC15	-1.01518	0.816201	1.83138	1560
GPR176	-0.800593	1.03008	1.83067	1561
NUDT14	-0.762897	1.0672	1.8301	1562
ABHD12B	0.245724	2.07556	1.82983	1563
THOC3	-0.682924	1.14672	1.82965	1564
LCE2A	-0.449218	1.38027	1.82948	1565
TCTN3	0.834439	2.66354	1.8291	1566
GXYLT2	-0.113102	1.71599	1.82909	1567
SFXN5	-0.474786	1.35422	1.829	1568
CDK19	-0.621659	1.20724	1.8289	1569
SIGMAR1	-0.618756	1.2097	1.82846	1570
POLR2B	-1.19049	0.635636	1.82612	1571
C2orf66	0.604649	2.43065	1.826	1572
SEC16B	-1.22448	0.601204	1.82568	1573
OSR2	-2.89682	-1.0715	1.82532	1574
GNL1	-0.703804	1.12114	1.82495	1575
PDCD4	-1.26121	0.563586	1.8248	1576
SUCLA2	-1.09703	0.727743	1.82477	1577
LEF1	-1.95104	-0.126987	1.82405	1578
ELOVL1	-0.508277	1.31574	1.82402	1579
CDKAL1	-1.37583	0.446172	1.822	1580
CCL19	-0.57452	1.24737	1.82189	1581
TOB1	-3.73511	-1.91336	1.82175	1582
SLC6A7	-0.490883	1.32925	1.82014	1583
NR4A2	-2.25388	-0.434017	1.81986	1584
GLB1L2	-0.416572	1.40278	1.81935	1585
ALG5	-0.181404	1.6378	1.81921	1586
ATPAF2	0.0474255	1.86643	1.81901	1587
TP63	-2.80036	-0.981437	1.81892	1588
VIPR2	-0.857123	0.961417	1.81854	1589
FBXL8	-0.415968	1.40246	1.81843	1590
CDK5R1	-0.592494	1.22368	1.81617	1591
SLC9A3R1	0.371065	2.18683	1.81576	1592
GALK1	-0.444002	1.37162	1.81563	1593
CASP5	-0.892636	0.922942	1.81558	1594
PADI1	-0.760142	1.05521	1.81535	1595
LBX2-AS1	-0.563222	1.25184	1.81507	1596
AP2M1	-1.3058	0.508586	1.81439	1597
C7orf31	-0.859741	0.953598	1.81334	1598
ZBTB18	-0.544074	1.26849	1.81256	1599
SYN3	1.71433	3.52562	1.8113	1600
ATRAID	-0.00207535	1.80895	1.81102	1601
BMP7	-0.492601	1.31805	1.81065	1602
VRK1	0.306732	2.11656	1.80983	1603
EIF4A1	0.317674	2.12742	1.80974	1604
GPC6	-1.81921	-0.0095547	1.80966	1605
TIMM17A	-0.283128	1.52607	1.8092	1606
DIMT1	-0.40515	1.40384	1.80899	1607
CCBL2	-0.354377	1.45429	1.80867	1608
AGXT	-0.540975	1.26732	1.8083	1609
PRDX2	-0.435305	1.37251	1.80781	1610
MAPT	-1.77644	0.0313282	1.80777	1611
FAM19A1	-0.263479	1.544	1.80748	1612
CLDN7	-0.637387	1.1695	1.80688	1613
NAALAD2	0.110312	1.91717	1.80686	1614
STK10	-0.490595	1.31399	1.80459	1615
BMPR1B	-2.14959	-0.346948	1.80264	1616
FCGR3A	-0.445184	1.35652	1.8017	1617
MAST3	-1.50535	0.296263	1.80161	1618
TLE2	0.366961	2.16831	1.80135	1619
SLC18A2	-0.486759	1.31454	1.8013	1620
PRRG3	-0.501141	1.30003	1.80118	1621
DNASE1L2	-0.498512	1.30229	1.8008	1622
FAM3B	-0.68226	1.11817	1.80043	1623
LIN28B	-0.231119	1.56876	1.79988	1624
SHFM1	-0.944157	0.855024	1.79918	1625
ALMS1P	-0.882648	0.915768	1.79842	1626
SNRPN	-0.926852	0.87141	1.79826	1627
SOAT1	0.72731	2.52544	1.79813	1628
CLK3	-1.03232	0.764563	1.79688	1629
NR2E3	-0.823822	0.972189	1.79601	1630
SPG11	-0.0374858	1.75849	1.79598	1631
MELK	0.0850013	1.88094	1.79594	1632
SLC39A1	-0.202778	1.5924	1.79518	1633
EIF3G	-0.595247	1.19992	1.79516	1634
SLC25A11	-1.18532	0.609312	1.79463	1635
TFF2	-0.515746	1.27846	1.79421	1636
KLHDC2	-0.957451	0.835785	1.79324	1637
U2AF1L4	-0.485124	1.30779	1.79291	1638
FABP1	-0.931361	0.861243	1.7926	1639
CBS	-0.4553	1.33531	1.79061	1640
FGFR3	0.431815	2.22196	1.79015	1641
SNRNP48	-0.812065	0.977328	1.78939	1642
FAM213A	0.509706	2.29891	1.78921	1643
CHRNA6	-0.783359	1.00535	1.78871	1644
EXOC7	-0.370284	1.41686	1.78714	1645
FUBP3	0.54692	2.33363	1.78671	1646
FAM221B	-0.831599	0.954781	1.78638	1647
SAMD3	0.366326	2.15197	1.78564	1648
SYNPR	-0.635925	1.14908	1.785	1649
NPR3	0.779275	2.56401	1.78474	1650
FLT4	-0.508401	1.27573	1.78413	1651
IFNGR1	-0.941383	0.842651	1.78403	1652
FOXA1	-3.80697	-2.02321	1.78376	1653
C3orf35	-0.285189	1.49846	1.78364	1654
COQ3	0.280791	2.06416	1.78337	1655
CYP20A1	-1.08636	0.696964	1.78333	1656
CASK	-1.09962	0.683214	1.78283	1657
CYP3A7	-0.599945	1.18182	1.78177	1658
NFATC2IP	-0.575497	1.20555	1.78105	1659
TRIM44	-0.390505	1.39031	1.78081	1660
GLB1L3	-1.04585	0.734484	1.78033	1661
BRIP1	-0.736487	1.04351	1.78	1662
CCDC97	0.43443	2.21324	1.77881	1663
KCNK13	-1.47547	0.303002	1.77847	1664
MAP3K12	-0.214497	1.56392	1.77841	1665
ZNF563	-0.222802	1.55527	1.77808	1666
TRPV5	-0.314599	1.46323	1.77783	1667
ASIC1	-1.16747	0.6093	1.77677	1668
DUS3L	-0.558015	1.21786	1.77588	1669
KCNN4	-1.11356	0.661881	1.77544	1670
ELMO1	-0.00675561	1.76867	1.77542	1671
FASTK	-1.23776	0.537662	1.77542	1672
PURB	-2.91633	-1.14148	1.77485	1673
TRAPPC10	-0.578661	1.19593	1.77459	1674
CSNK1D	-1.92437	-0.150174	1.7742	1675
PHKB	-0.702747	1.07144	1.77418	1676
SLC41A2	0.345916	2.11996	1.77405	1677
ULK4	0.580861	2.35481	1.77395	1678
NFYB	-0.887731	0.886038	1.77377	1679
COPS5	-1.09796	0.675669	1.77363	1680
PLEKHO1	-3.78405	-2.01095	1.77311	1681
TTLL12	-0.924991	0.848025	1.77302	1682
MRPS15	-1.01585	0.757	1.77285	1683
RPTOR	-0.755533	1.01706	1.77259	1684
MEMO1	-0.525133	1.24742	1.77255	1685
FAM216A	-0.350282	1.42193	1.77221	1686
PEA15	-1.01006	0.76197	1.77203	1687
ICE2	0.0365828	1.80792	1.77134	1688
PAPLN	-0.114708	1.65595	1.77066	1689
GUK1	-1.03885	0.730999	1.76985	1690
NUFIP2	-1.35066	0.41892	1.76958	1691
FBXL20	-0.195304	1.57381	1.76912	1692
SPZ1	0.0182623	1.78729	1.76903	1693
PTPRE	-1.39296	0.375609	1.76857	1694
ANXA2	-2.55805	-0.790323	1.76773	1695
NXF2	-1.59073	0.176858	1.76759	1696
TLK2	-0.278414	1.48868	1.7671	1697
CNTF	-0.967449	0.799236	1.76668	1698
SLC38A11	-2.05107	-0.285028	1.76604	1699
GPR101	-2.90102	-1.13568	1.76534	1700
ATL1	0.626146	2.38954	1.76339	1701
HNRNPK	-1.77243	-0.00907103	1.76336	1702
CGGBP1	-2.24621	-0.483229	1.76298	1703
TPRA1	-1.39408	0.367751	1.76184	1704
LIMK1	-1.75586	0.00595805	1.76182	1705
NBPF15	-0.433742	1.32766	1.7614	1706
NTNG1	-0.0122499	1.74869	1.76094	1707
ZCCHC16	-0.521244	1.23969	1.76093	1708
EFCAB14	-0.301008	1.45992	1.76092	1709
FBXO42	-0.153197	1.60683	1.76002	1710
NDNF	-0.904567	0.855306	1.75987	1711
RNF5	-1.01654	0.742649	1.75919	1712
NR0B2	-0.0676295	1.6915	1.75913	1713
TAS2R9	-1.56391	0.194674	1.75858	1714
CASP1	-0.55524	1.20327	1.75851	1715
KRT6A	1.2733	3.03101	1.75771	1716
EFHC2	-1.33765	0.419102	1.75675	1717
AMT	-0.613852	1.14247	1.75632	1718
CTAGE5	-0.692365	1.06392	1.75628	1719
MXI1	-2.723	-0.968343	1.75466	1720
RAF1	-0.403002	1.35075	1.75375	1721
GNB4	0.513958	2.26682	1.75286	1722
BMX	-0.447017	1.30577	1.75278	1723
PI4KAP2	0.0720478	1.82481	1.75276	1724
LCK	-0.916171	0.835921	1.75209	1725
ATP6V0D1	-0.64202	1.10996	1.75198	1726
JADE2	-1.9795	-0.227675	1.75183	1727
ACADSB	0.207022	1.95884	1.75181	1728
LOC101060386	-0.672224	1.07929	1.75152	1729
RERG	-1.45607	0.295298	1.75137	1730
GCDH	0.738439	2.48817	1.74973	1731
CTBP2	-2.87556	-1.12615	1.74941	1732
ODAM	-0.536318	1.21252	1.74884	1733
C11orf53	0.116873	1.86368	1.7468	1734
CKAP2L	-0.659597	1.08602	1.74562	1735
AGPAT2	-0.937321	0.808252	1.74557	1736
HSPBP1	-0.325885	1.41954	1.74543	1737
TDRD10	-0.638262	1.10698	1.74524	1738
INSL5	-0.632066	1.113	1.74507	1739
GPN2	-1.37397	0.370402	1.74437	1740
APRT	0.931081	2.67537	1.74429	1741
FBXO48	0.13767	1.88164	1.74397	1742
CCDC86	-0.0436085	1.70032	1.74393	1743
C17orf82	-0.598828	1.14455	1.74338	1744
CC2D1B	-0.124453	1.61837	1.74282	1745
ASMTL-AS1	0.0638257	1.80652	1.7427	1746
ELMOD3	-0.908459	0.834134	1.74259	1747
NR1H3	-0.287659	1.45475	1.74241	1748
CLEC12A	-0.227323	1.51482	1.74214	1749
C7orf49	-1.09567	0.64624	1.74191	1750
TRAP1	-0.858885	0.882908	1.74179	1751
RAB3A	-0.783682	0.957754	1.74144	1752
COTL1	-1.33601	0.404897	1.74091	1753
KRTAP19-1	-0.880705	0.859424	1.74013	1754
NDUFS1	-0.440566	1.29801	1.73858	1755
IRAK4	-0.253888	1.48458	1.73847	1756
INSR	-1.94626	-0.208066	1.7382	1757
ZNF662	-0.486166	1.25075	1.73692	1758
NME5	-1.49865	0.238216	1.73687	1759
LDOC1	-1.19637	0.539598	1.73597	1760
RPL26	-0.827579	0.90833	1.73591	1761
MNAT1	-0.16354	1.5723	1.73584	1762
RGN	-0.248984	1.48678	1.73577	1763
VANGL1	0.131463	1.86718	1.73572	1764
CDYL2	-1.29652	0.437903	1.73442	1765
KDR	-1.18602	0.548025	1.73404	1766
PAPSS1	-0.559595	1.17406	1.73365	1767
DTWD1	-0.465277	1.26778	1.73305	1768
NSUN6	-0.433029	1.2992	1.73223	1769
OR2T33	-0.433303	1.29694	1.73024	1770
R3HDM2	-0.606628	1.12311	1.72974	1771
DDX20	-0.334256	1.3951	1.72935	1772
PNLDC1	-0.698112	1.03089	1.72901	1773
DDX31	-1.60707	0.121632	1.7287	1774
JOSD2	-0.283786	1.44488	1.72867	1775
WNT2	-0.998395	0.730229	1.72862	1776
GPR144	-0.757832	0.970594	1.72843	1777
FUT1	-1.14814	0.580046	1.72819	1778
TMEM120B	-1.18916	0.53889	1.72805	1779
C19orf26	-1.1893	0.538635	1.72794	1780
PDS5B	0.918623	2.64592	1.72729	1781
PTTG1	-0.683338	1.04344	1.72678	1782
SLC13A4	0.716568	2.44323	1.72667	1783
ACSS2	0.411252	2.13757	1.72632	1784
SLC39A5	-1.4503	0.275535	1.72583	1785
AK4	-1.17792	0.547898	1.72582	1786
CCL14	-0.169822	1.55519	1.72501	1787
SLAMF7	-0.247091	1.47791	1.72501	1788
LARS2	-2.15605	-0.431407	1.72464	1789
UNC45B	-1.82778	-0.103305	1.72447	1790
TRPT1	-0.538603	1.18567	1.72427	1791
RBM4B	0.594374	2.31813	1.72376	1792
GPR21	-2.91737	-1.19361	1.72376	1793
DNM3	-0.181286	1.54239	1.72368	1794
ADAM2	0.249139	1.97274	1.7236	1795
ARHGEF10L	0.215049	1.93862	1.72357	1796
PRKD2	-1.95354	-0.230594	1.72295	1797
MTERF3	1.08433	2.80684	1.72251	1798
ZNF485	-0.537879	1.18409	1.72197	1799
COA7	-0.463891	1.25775	1.72164	1800
IL2	-0.941192	0.779571	1.72076	1801
DNAJC10	-2.05427	-0.33367	1.7206	1802
ESRRG	-1.8449	-0.124364	1.72054	1803
FAR1	0.0566768	1.77708	1.72041	1804
TUBB3	-1.54626	0.173555	1.71981	1805
FGFR3	-1.46459	0.254818	1.71941	1806
GGPS1	-0.78182	0.937339	1.71916	1807
ARHGAP28	-0.145404	1.57328	1.71868	1808
XCR1	0.474947	2.19356	1.71861	1809
NEDD1	-1.12703	0.591494	1.71852	1810
MRPL1	-0.336749	1.38154	1.71829	1811
MRPL12	-0.93461	0.783612	1.71822	1812
TMEM231	-2.00477	-0.28671	1.71806	1813
GSDMC	-0.813272	0.904731	1.718	1814
ALDH1A1	-0.514543	1.20308	1.71762	1815
C8orf59	-1.36378	0.353689	1.71747	1816
MAPRE3	-1.18493	0.53244	1.71737	1817
TSEN54	0.240582	1.95785	1.71727	1818
C14orf119	-0.943671	0.773531	1.7172	1819
BMP2K	-1.00493	0.711955	1.71689	1820
MC1R	-0.0765133	1.64034	1.71686	1821
ANKRD53	-0.750011	0.966003	1.71601	1822
TTYH3	-1.19951	0.516383	1.7159	1823
MKNK2	-1.36591	0.349768	1.71568	1824
GPR114	-2.31259	-0.598192	1.7144	1825
ACTR8	0.140361	1.85468	1.71432	1826
OLR1	-0.0642302	1.64997	1.7142	1827
MASTL	-1.1522	0.561624	1.71383	1828
TGFBRAP1	-1.09168	0.62175	1.71343	1829
SPOCK3	-0.484713	1.22816	1.71288	1830
SMURF1	0.506637	2.21879	1.71215	1831
AEN	-0.151225	1.56044	1.71166	1832
C17orf75	-0.77032	0.940465	1.71079	1833
ANKMY1	-0.122272	1.5885	1.71077	1834
BCAP31	-1.77147	-0.0608728	1.71059	1835
CSH2	-0.754686	0.955652	1.71034	1836
EVI2A	-1.14288	0.567148	1.71003	1837
ACVR1C	-1.65342	0.0561136	1.70953	1838
OR8I2	0.0877887	1.79698	1.70919	1839
STPG2	-0.484816	1.22419	1.70901	1840
GPR151	-1.16074	0.548261	1.709	1841
RET	-0.24313	1.46586	1.70899	1842
DPF3	-2.19421	-0.485372	1.70884	1843
GPC4	-0.571857	1.13693	1.70879	1844
ELAVL2	-2.19564	-0.487226	1.70842	1845
PRKCB	-1.38638	0.321984	1.70836	1846
DMD	-1.44114	0.266891	1.70803	1847
SLC9A6	-1.22864	0.479377	1.70801	1848
ADAMTSL1	-1.06522	0.642173	1.70739	1849
SLC25A43	-1.18384	0.521818	1.70566	1850
GPR151	-2.0106	-0.306177	1.70442	1851
TNFRSF13B	-1.84241	-0.13803	1.70438	1852
GPR21	-1.1307	0.573022	1.70373	1853
TSTD2	-0.826165	0.877395	1.70356	1854
ARHGEF25	-1.10053	0.602627	1.70316	1855
HOXD3	-2.70773	-1.00497	1.70276	1856
PNN	-2.08155	-0.379346	1.7022	1857
LOC158435	-0.992441	0.709129	1.70157	1858
PLK4	0.6513	2.35286	1.70156	1859
WDFY3	0.0717836	1.77326	1.70147	1860
DDX11	-0.498505	1.20268	1.70118	1861
SLC5A7	0.381797	2.08258	1.70078	1862
LINC00161	-2.12491	-0.424688	1.70022	1863
STK4	-0.302281	1.39784	1.70012	1864
CXorf22	0.873509	2.57324	1.69973	1865
ADSSL1	-0.443266	1.25629	1.69955	1866
NKAP	-0.603593	1.0946	1.69819	1867
FCRLA	-0.675736	1.02239	1.69812	1868
SEMG1	-0.559157	1.13855	1.69771	1869
RORB	-2.68541	-0.988857	1.69655	1870
S100A10	-0.510079	1.18582	1.6959	1871
GNG8	-0.19496	1.50059	1.69555	1872
BIRC8	-0.403056	1.29209	1.69515	1873
TM4SF18	0.1728	1.86733	1.69453	1874
USP37	0.260583	1.95438	1.6938	1875
HRH2	0.890868	2.58459	1.69373	1876
DNAJB12	-3.36667	-1.67312	1.69356	1877
KRT18	-0.506444	1.18666	1.69311	1878
SCLY	0.504004	2.19703	1.69303	1879
SERPINA12	-0.520414	1.17186	1.69228	1880
MICB	-0.803419	0.888354	1.69177	1881
ZNF625	-0.0847607	1.60699	1.69175	1882
CACNA2D3	-1.05986	0.631659	1.69152	1883
ADSS	-0.044674	1.64684	1.69151	1884
HLA-A	-0.179593	1.51179	1.69138	1885
CSNK1G1	-1.06023	0.630896	1.69113	1886
SCO2	-2.67815	-0.987208	1.69094	1887
FCRL5	-3.21823	-1.52817	1.69006	1888
FAM161A	0.721668	2.41173	1.69006	1889
RPS17	-0.533044	1.15649	1.68954	1890
MYCBP	-0.48491	1.20458	1.68949	1891
EDA2R	-1.87915	-0.190058	1.68909	1892
FBXL4	-0.120183	1.56696	1.68715	1893
PHTF2	-1.31828	0.368431	1.68671	1894
ZNF138	-0.0302642	1.65604	1.6863	1895
RPS6KA6	0.537843	2.22333	1.68549	1896
CCDC102A	-0.176405	1.50847	1.68488	1897
ZNF317	-0.78749	0.89724	1.68473	1898
CCNH	-0.734968	0.949739	1.68471	1899
DDIAS	-2.3513	-0.667091	1.68421	1900
PDZD4	-1.35563	0.328201	1.68383	1901
DBNDD1	-1.26352	0.419908	1.68342	1902
MEIOB	-0.0836372	1.59967	1.6833	1903
MAP3K12	-1.62168	0.0615542	1.68323	1904
DGUOK	-0.957237	0.725927	1.68316	1905
CHD1	0.648549	2.33163	1.68309	1906
MB21D2	-0.978591	0.704123	1.68271	1907
C19orf47	-0.767736	0.914417	1.68215	1908
SLC2A6	-0.0617888	1.62007	1.68186	1909
PTBP1	-2.14002	-0.458861	1.68116	1910
TEX264	-1.7163	-0.0370208	1.67928	1911
PAPOLB	-1.80453	-0.126293	1.67823	1912
IFI16	-0.335926	1.34178	1.67771	1913
MRGPRD	-1.67692	0.000517539	1.67743	1914
SEC22B	-0.848484	0.828846	1.67733	1915
OR5M8	-0.40844	1.26747	1.67591	1916
AGRP	-0.876622	0.798751	1.67537	1917
SSBP3	-2.78054	-1.10541	1.67513	1918
IGHM	-0.861386	0.813592	1.67498	1919
LCLAT1	-0.309882	1.36496	1.67484	1920
PPP2R5D	0.350526	2.02487	1.67434	1921
IP6K3	0.685703	2.35978	1.67408	1922
PARVA	-0.485722	1.18833	1.67405	1923
C11orf54	0.0696905	1.74352	1.67383	1924
RRAGD	-0.0784314	1.59438	1.67281	1925
POLR1C	-0.485357	1.18689	1.67225	1926
FOS	-2.46852	-0.797578	1.67094	1927
PITRM1	-0.996755	0.673913	1.67067	1928
KCNC1	-0.478889	1.19002	1.66891	1929
TSHZ3	-0.48114	1.18763	1.66877	1930
BRAF	-0.520245	1.14814	1.66839	1931
FUT7	-0.712099	0.955717	1.66782	1932
RCHY1	-0.588544	1.07897	1.66751	1933
RPS6KA4	-1.50478	0.162481	1.66726	1934
MRGPRG	-0.654669	1.01236	1.66702	1935
CDKN1A	-3.71151	-2.04586	1.66565	1936
HSD17B1	-0.882456	0.782618	1.66507	1937
RCL1	-0.191164	1.4738	1.66497	1938
TUBG1	-0.0136584	1.65106	1.66472	1939
PRPSAP1	-1.21686	0.446784	1.66364	1940
NGDN	0.240621	1.90381	1.66319	1941
SNAPC2	-1.21207	0.450728	1.6628	1942
GMDS	-2.707	-1.04486	1.66214	1943
DCLK2	-0.883923	0.777863	1.66179	1944
ZNF524	-2.56547	-0.904179	1.66129	1945
CRABP1	-0.468381	1.19263	1.66101	1946
PKMYT1	-0.820424	0.840584	1.66101	1947
AVPR1A	-0.393105	1.26767	1.66078	1948
NACC1	-1.42583	0.234253	1.66008	1949
MTM1	-0.370678	1.28903	1.65971	1950
SBNO1	-0.484126	1.17556	1.65969	1951
GPR84	0.191991	1.85165	1.65965	1952
IFIT1	-0.0635607	1.59605	1.65961	1953
MECR	-0.558317	1.0998	1.65812	1954
PRKACB	-0.751726	0.906335	1.65806	1955
LOC284009	-0.253464	1.40444	1.6579	1956
DNASE1L3	-0.319724	1.33786	1.65758	1957
CYSLTR2	-2.66409	-1.00674	1.65735	1958
PAF1	-0.321529	1.33568	1.65721	1959
CD55	-0.281033	1.37614	1.65717	1960
GP6	-0.256264	1.40085	1.65711	1961
RAB3B	-0.153715	1.50334	1.65706	1962
HOXC9	-1.16153	0.495515	1.65705	1963
LINC00477	-0.613683	1.04334	1.65702	1964
CBFA2T2	-0.847803	0.807988	1.65579	1965
OARD1	-0.952648	0.702958	1.65561	1966
DUPD1	-0.439052	1.21647	1.65552	1967
ABI1	-0.201798	1.45372	1.65552	1968
STK38	-0.569688	1.08571	1.6554	1969
BMP2KL	-0.475436	1.17985	1.65529	1970
CEP162	-1.42016	0.235129	1.65529	1971
NET1	-0.88837	0.766154	1.65452	1972
BAG4	0.888545	2.54212	1.65358	1973
APLNR	-0.0224377	1.63062	1.65306	1974
STARD7	-0.754013	0.898974	1.65299	1975
RTN2	0.185732	1.83805	1.65232	1976
STK3	-0.290858	1.36085	1.6517	1977
KPNA2	-1.35664	0.294326	1.65097	1978
ADRB2	-1.73088	-0.0799965	1.65088	1979
NUDT9P1	-0.404128	1.24657	1.65069	1980
GDE1	-0.266596	1.38408	1.65068	1981
RBM17	-1.10211	0.547956	1.65007	1982
GRAMD1C	-0.726687	0.923276	1.64996	1983
GTPBP3	-1.27098	0.378768	1.64975	1984
RNF139	-3.14296	-1.49331	1.64965	1985
NR0B1	-1.24021	0.4092	1.64941	1986
CNBD1	-0.48028	1.16864	1.64892	1987
USP1	-0.117567	1.53096	1.64853	1988
BSCL2	-1.30133	0.347189	1.64852	1989
FAM217B	-0.991989	0.6562	1.64819	1990
HOXB6	-4.17259	-2.52443	1.64815	1991
EDNRB	0.383407	2.03098	1.64757	1992
ZNF671	-0.748533	0.89901	1.64754	1993
S100PBP	-0.551921	1.09455	1.64647	1994
LINC00242	-0.610431	1.03595	1.64639	1995
ZNF30	-0.00816173	1.63821	1.64637	1996
PRND	-0.885952	0.758128	1.64408	1997
IQUB	-3.01185	-1.36793	1.64393	1998
PKIG	0.0387286	1.6821	1.64337	1999
[truncated: 15,256 more rows]

## Sheet: Table 2
Gene Symbol	Luciferase, No Enzalutamide	CREB5, No enzalutamide	Luciferase Enzalutamide	CREB5, enzalutamide
AARSD1	0	0.5	0	0
AASDHPPT	0	0.5	0	1
ABCC4	0	1	0	0
ACAT2	0	0	0	1
ACIN1	0	1.5	0	1.5
ACOT7	0	2.5	0	1
ACP1	0	1.5	0	2
ACTL6A	0	3.5	0	11
ACTR3	0	1	0	0
ADNP	0	6	0	13.5
ADSL	0	1.5	0	0
AES	0	1	0	1.5
AHCTF1	0	0	0	1
AKR7A2	0	0	0	1
ALAD	0	0.5	0	0
ALDH1B1	0	0.5	0	0
ALKBH5	0	0	0	1
ALYREF	0	0.5	0	0.5
ANAPC7	0	0	0	1
ANKRD18B	0	0	0	1
ANP32E	0	2.5	0	5
ANXA5	0	1	0	0
AP1S1	0	1	0	0
APEX1	0	0	0	1.5
AQR	0	2.5	0	4.5
AR	0	5	0	1
ARHGAP1	0	1	0	0
ARID1A	0	8	0	11
ARID1B	0	1	0	0
ARID2	0	0	0	3
ARID5B	0	0	0	1
ARL6IP4	0	1	0	2.5
ASNA1	0	1	0	0
ASNS	0	1.5	0	3
ATF7	0	9.5	0	10
ATN1	0	1	0	2
ATP1A1	0	0.5	0	0
ATP6V1B2	0	1	0	0
ATRX	0	0	0	2
ATXN10	0	1	0	0
BANF1	0	0.5	0	1
BAP18	0	0.5	0	0
BARD1	0	0	0	1
BAZ1B	0	2	0	3
BBS2	0	0.5	0	0.5
BCAS2	0	1	0	2
BCLAF1	0	1	0	1.5
BCOR	0	0	0	1
BLVRB	0	1	0	0
BMPER	0	1	0	0
BNIPL	0	0	0	0.5
BOLA2	0	0.5	0	1
BOP1	0	1	0	1.5
BPTF	0	0	0	1
BRAT1	0	0	0	1
BRCA1	0	0	0	0.5
BRD2	0	5	0	6.5
BRD3	0	0.5	0	1.5
BRD4	0	0	0	1
BROX	0	1	0	3
BSG	0	2	0	0
BTAF1	0	0	0	1.5
BUB3	0	5.5	0	7
C12orf10	0	0.5	0	0.5
C14orf166	0	0.5	0	1
C19orf68	0	0	0	0.5
C5orf51	0	0	0	1
C9orf142	0	0.5	0	0
C9orf43	0	0	0	0.5
CAND1	0	0.5	0	0
CAPZB	0	0.5	0	0
CASZ1	0	0.5	0	9.5
CBX1	0	3	0	1.5
CBX5	0	3	0	4
CCDC12	0	0	0	1
CCDC6	0	1	0	0
CCNT1	0	0	0	2.5
CCT6A	0	2.5	0	3.5
CCT7	0	0.5	0	0
CD2BP2	0	0.5	0	1
CDC40	0	1	0	1.5
CDC5L	0	1.5	0	4
CDC73	0	4.5	0	6.5
CDCA2	0	0	0	1
CDH18	0	1	0	0
CDK1	0	4.5	0	6
CDK11A	0	0.5	0	3
CDK3	0	0	0	1
CDSN	0	1	0	0
CEBPB	0	1.5	0	1.5
CELF1	0	1	0	0
CFDP1	0	1.5	0	0
CHAF1B	0	0	0	1
CHAMP1	0	1	0	4
CHD3	0	5	0	7.5
CHD4	0	5	0	21.5
CHD5	0	3	0	2.5
CHD7	0	0	0	1
CHD8	0	0	0	2
CHEK1	0	0	0	1
CHERP	0	0	0	1
CHORDC1	0	1	0	0
CHTOP	0	1	0	0
CIAPIN1	0	0.5	0	1
CNOT1	0	0	0	1
COIL	0	1	0	2
COMT	0	0.5	0	0
COPS2	0	0	0	1
COPS7A	0	0.5	0	0
COPZ1	0	1	0	0
CORO1C	0	1	0	0
CPNE1	0	1	0	5.5
CPSF1	0	0	0	2
CPSF6	0	0.5	0	2.5
CPSF7	0	3	0	3.5
CREB5	0	6.5	0	13.5
CREBBP	0	0	0	1
CRNKL1	0	2.5	0	6.5
CSE1L	0	8.5	0	5.5
CSNK2A1	0	1	0	7
CSNK2B	0	0.5	0	1
CSRP1	0	1	0	1
CSTB	0	1	0	0
CSTF1	0	0	0	2
CSTF2	0	1.5	0	2.5
CSTF3	0	1.5	0	4
CTBP1	0	4	0	7
CTBP2	0	4.5	0	7.5
CTNNBL1	0	0	0	1
CUL3	0	0	0	2
CUL4A	0	1	0	1
CWC15	0	0	0	1
CWC22	0	0	0	1
CXorf56	0	0	0	1
CYB5RL	0	0	0	1
DCAF7	0	2	0	3
DDB1	0	1.5	0	1
DDX1	0	3	0	3.5
DDX23	0	3.5	0	6
DDX27	0	0.5	0	0
DDX46	0	2	0	4
DDX50	0	0	0	3
DEK	0	0.5	0	1
DFFA	0	0	0	1
DHFR	0	1	0	1
DHX15	0	8.5	0	10.5
DHX16	0	1	0	0
DHX38	0	0	0	1
DHX40	0	0	0	1
DIS3	0	0	0	1
DKC1	0	1	0	2
DNAJA1	0	0.5	0	0
DNAJB1	0	0	0	3
DNAJC7	0	3	0	4
DNAJC8	0	2	0	4.5
DNAJC9	0	2	0	0.5
DNM1L	0	1	0	0
DNMT1	0	5	0	5.5
DPF2	0	1.5	0	4
DSTN	0	1.5	0	1
DUS3L	0	1	0	1
EDF1	0	1	0	0.5
EHMT1	0	0	0	1
EHMT2	0	0	0	1
EIF3F	0	0.5	0	0
EIF3I	0	3	0	0
EIF3K	0	1	0	1
EIF5A2	0	0	0	0.5
EIF6	0	1.5	0	0
ELMSAN1	0	1	0	0
EMSY	0	0	0	1
ENO3	0	1	0	1
EP300	0	0	0	3
EP400	0	0	0	3
EPHA10	0	0	0	1
EPHA7	0	4	0	4
EPM2AIP1	0	4	0	8.5
ERP44	0	1	0	0
ESRRA	0	2	0	2
EWSR1	0	1	0	2
EXOSC10	0	0	0	2
EXOSC6	0	0	0	1
EXOSC9	0	1	0	0
FAF1	0	0	0	1
FAM50A	0	1.5	0	2.5
FAM98B	0	2	0	3
FANCD2	0	1	0	1
FANCI	0	1	0	4
FBRS	0	0	0	0.5
FEN1	0	5.5	0	4
FERMT1	0	0	0	1
FGFR1OP	0	0	0	1
FIP1L1	0	0	0	2
FKBP5	0	2	0	0
FLAD1	0	0	0	2
FOXA1	0	0.5	0	2
FOXF1	0	0	0	0.5
FOXK1	0	1	0	0
FTH1	0	1	0	0
GATAD2A	0	2	0	4
GATAD2B	0	7.5	0	7.5
GIGYF2	0	1	0	0
GINS3	0	0.5	0	0
GINS4	0	1.5	0	1
GLO1	0	1	0	1
GLRX3	0	0	0	1
GLYATL1	0	1	0	0
GMPS	0	1	0	2.5
GNL3	0	2.5	0	3.5
GOT1	0	2	0	0
GRB2	0	0	0	1
GRHL2	0	6	0	10
GSE1	0	0	0	3
GSS	0	1	0	0
GTF2B	0	0	0	1
GTF2E1	0	1	0	2
GTF2E2	0	0	0	2
GTF2I	0	17	0	29
GTF3C1	0	1	0	4
GTF3C2	0	1	0	0
GTF3C3	0	1	0	3
GTF3C4	0	0	0	1
GTF3C5	0	0	0	2
H1FX	0	1	0	0
H2AFY2	0	1	0	0.5
HACE1	0	0	0	1
HAT1	0	1.5	0	2.5
HCFC1	0	9	0	14.5
HDAC1	0	0	0	1
HDAC2	0	3.5	0	4
HDGF	0	0	0	0.5
HDGFL2	0	0	0	0.5
HEATR3	0	1	0	1
HIBADH	0	1	0	0
HIST1H1D	0	1	0	0
HIST2H2AA3	0	1	0	1
HLTF	0	0	0	3
HMBS	0	2	0	1
HMCN1	0	1	0	0
HMG20B	0	1	0	4
HMGB1	0	5	0	6
HMGB1P1	0	2	0	2
HMGB2	0	4	0	2.5
HMGB3	0	2	0	3
HNRNPA0	0	1.5	0	2
HNRNPA1	0	1	0	3
HNRNPCL4	0	1	0	1
HNRNPDL	0	2	0	2
HNRNPH1	0	2.5	0	2.5
HNRNPK	0	0	0	1
HNRNPLL	0	0	0	1
HNRNPUL1	0	0	0	3
HOXB13	0	3.5	0	3.5
HOXD10	0	0.5	0	0
HUWE1	0	1	0	1
IK	0	2.5	0	3
ILF2	0	6	0	6
ILF3	0	4	0	6
ILKAP	0	1.5	0	1.5
ING3	0	0	0	1
INTS1	0	0	0	1
INTS13	0	0	0	1
INTS9	0	0	0	1
IPO5	0	1	0	1
IPO7	0	0	0	2
IPO8	0	2	0	2
IRF2BP1	0	4	0	4
IRF2BP2	0	2	0	5
IRF2BPL	0	2	0	9
ISY1	0	0.5	0	2
JPT2	0	1	0	0
JUN	0	3	0	5.5
JUNB	0	8	0	10.5
JUND	0	10	0	8.5
KAT7	0	1	0	1
KDELR2	0	0	0	0.5
KDM1A	0	0	0	3
KDM1B	0	1	0	1
KDM5B	0	0	0	1
KDM5C	0	0	0	1
KDM6A	0	0	0	4
KERA	0	1	0	0
KHDRBS1	0	0	0	1
KIF20A	0	0	0	1
KIF22	0	1	0	0
KIF2A	0	0	0	1
KIF2C	0	0	0	1
KIF4A	0	3.5	0	4
KIF4B	0	0	0	1
KLF16	0	0.5	0	0.5
KPNB1	0	0.5	0	0
KRR1	0	0	0	1
LARP1	0	1	0	0
LARP7	0	0	0	1
LASP1	0	1	0	0.5
LCP1	0	1	0	0
LDB1	0	0	0	1
LDHA	0	1.5	0	0
LIG3	0	1	0	2
LIX1L	0	0	0	0.5
LMNB2	0	1	0	0
LSM3	0	0.5	0	0.5
LUC7L2	0	5	0	6
MAGOH	0	0	0	1
MAPK8IP3	0	0.5	0	1
MARCKSL1	0	1	0	1
MATR3	0	2.5	0	1
MCM2	0	7	0	8
MCM3	0	3.5	0	3.5
MCM5	0	3	0	1
MCM6	0	6	0	5.5
MCM7	0	12	0	12
MDC1	0	0.5	0	1
MED14	0	0	0	1
METTL3	0	0.5	0	0
MFAP1	0	1	0	0
MKI67	0	0.5	0	0.5
MLF2	0	0.5	0	1
MLH1	0	0	0	2.5
MLLT1	0	0	0	1
MNAT1	0	0.5	0	0
MORC2	0	1.5	0	5.5
MRE11	0	0.5	0	0
MRFAP1	0	1	0	1
MRPL11	0	1	0	0
MRPL49	0	0.5	0	0
MTA1	0	4.5	0	5.5
MTA2	0	9	0	13
NACC1	0	1	0	1
NANS	0	1	0	1
NASP	0	2	0	0.5
NAT10	0	1	0	0
NCAPD3	0	0.5	0	1.5
NCBP1	0	0.5	0	1
NCBP2	0	0.5	0	0
NCDN	0	0	0	1
NCOR2	0	2	0	7.5
NEB	0	0	0	0.5
NEDD8	0	1	0	0
NELFA	0	0.5	0	0
NELFB	0	0.5	0	0
NELFCD	0	1	0	1
NELFE	0	1	0	1
NEMF	0	1	0	0
NFIA	0	3	0	5
NFIB	0	1	0	1.5
NFIX	0	0.5	0	2
NIPSNAP2	0	1	0	0
NKX3-1	0	1	0	0
NLE1	0	0	0	1
NOP56	0	0	0	0.5
NOSIP	0	0	0	3
NPM1	0	4.5	0	6.5
NR2C2	0	0	0	0.5
NR2F2	0	1	0	1
NT5DC2	0	1	0	0
NUDCD2	0	0	0	1
NUDT21	0	2	0	2
NUMA1	0	15	0	18.5
NUP155	0	0	0	2
NVL	0	1	0	0
NXF1	0	0.5	0	0
OGT	0	0.5	0	5
OS9	0	0.5	0	0
OTUB1	0	1	0	0
PA2G4	0	1	0	0
PABPN1	0	0.5	0	0.5
PAF1	0	0	0	4
PAFAH1B2	0	0.5	0	0
PAFAH1B3	0	1	0	1
PAPSS1	0	0	0	0.5
PARK7	0	0.5	0	0
PBK	0	0.5	0	1
PBRM1	0	2	0	10
PCNA	0	3.5	0	0
PDCD4	0	0.5	0	1
PDCD5	0	1.5	0	0
PDCD6	0	0	0	1
PDS5A	0	9.5	0	9
PDS5B	0	0	0	2
PEBP1	0	0.5	0	1.5
PFDN2	0	2	0	2
PFDN5	0	0	0	1
PGD	0	3.5	0	4
PHAX	0	1	0	1
PHF21A	0	0	0	1
PHF23	0	0	0	1
PHF6	0	0	0	1
PHF8	0	1	0	1
PHKA1	0	1	0	0
PIAS2	0	0	0	3
PIAS4	0	0	0	1
PIN1	0	1	0	3
PLAA	0	1	0	3
PLRG1	0	0	0	2.5
PMPCA	0	1	0	0
PNN	0	3	0	4
POGZ	0	1	0	7
POLD1	0	0.5	0	0
POLD2	0	1.5	0	1
POLD3	0	1.5	0	1
POLR2A	0	0	0	1.5
POLR2B	0	0	0	2
POLR2E	0	1	0	1
POLRMT	0	0	0	1
PPIAL4G	0	0.5	0	0
PPIE	0	1	0	0.5
PPIL4	0	2	0	2
PPM1G	0	2	0	2
PPME1	0	0	0	2
PPP1CB	0	0	0	1
PPP1CC	0	0	0	1
PPP1R10	0	0	0	3.5
PPP1R8	0	0	0	3
PPP2R1B	0	0	0	1
PPP2R5D	0	0	0	1
PPP4R3A	0	0.5	0	1.5
PRDX5	0	0	0	1.5
PRDX6	0	0.5	0	0
PRIM2	0	0	0	1
PRKDC	0	17	0	19
PRMT1	0	2.5	0	3.5
PRMT5	0	0	0	1.5
PRPF19	0	4.5	0	4
PRPF3	0	0	0	4.5
PRPF31	0	1.5	0	6
PRPF38A	0	1	0	1
PRPF4	0	1.5	0	4
PRPF40A	0	2	0	4
PRPF6	0	4.5	0	10.5
PRPF8	0	3.5	0	8
PRR12	0	1.5	0	1
PSIP1	0	0	0	1
PSMA8	0	0.5	0	0.5
PSMB6	0	1	0	0.5
PSMB7	0	1	0	0
PSMC3	0	0.5	0	0
PSMD10	0	0.5	0	1
PSMD14	0	0	0	0.5
PSME3	0	1	0	1.5
PSPC1	0	0.5	0	0.5
PUF60	0	3	0	2.5
PWP2	0	1	0	3
QARS	0	0	0	1
QRICH1	0	0.5	0	1
RAB3B	0	1	0	0
RAD21	0	0.5	0	1
RAD50	0	0	0	3
RALY	0	4	0	1.5
RANBP1	0	1	0	0
RBBP4	0	5	0	4
RBBP7	0	0	0	0.5
RBM10	0	3	0	3
RBM12	0	0	0	4
RBM12B	0	0	0	1
RBM14	0	1.5	0	2.5
RBM15	0	0.5	0	0.5
RBM17	0	1	0	2.5
RBM25	0	0	0	5.5
RBM27	0	0	0	2.5
RBM3	0	1	0	1
RBM33	0	0.5	0	1
RBM4	0	1	0	0.5
RBM8A	0	1.5	0	2
RCC2	0	4.5	0	7.5
RCOR1	0	0.5	0	3
RECQL	0	0	0	6
REPIN1	0	2	0	1.5
RFC1	0	1	0	3
RFC2	0	2.5	0	4.5
RFC3	0	0	0	1
RFC5	0	0	0	1.5
RING1	0	0.5	0	0.5
RNF20	0	3	0	10.5
RNF40	0	4	0	6.5
RNH1	0	0.5	0	1
RNPS1	0	0.5	0	2
ROBO2	0	1	0	0
RPA2	0	0	0	1
RPA3	0	3	0	1
RPL12	0	2	0	2
RPL13AP3	0	1.5	0	0
RPL17	0	1.5	0	0
RPL27	0	0.5	0	0
RPL34	0	0.5	0	0
RPL35	0	0.5	0	0.5
RPL39P5	0	0	0	0.5
RPL4	0	6	0	0
RPL5	0	0.5	0	0
RPLP2	0	1	0	0
RPRD1B	0	1	0	0.5
RPS19	0	1	0	0
RPS26P11	0	1	0	1
RPS6KA1	0	0	0	1
RREB1	0	0	0	2
RRM1	0	2	0	0
RRP12	0	1	0	0
RSF1	0	0	0	1
RTCB	0	4	0	3
RTF1	0	1	0	6
RTFDC1	0	0	0	1
SAP18	0	0	0	2
SAP30BP	0	0	0	0.5
SARG	0	0.5	0	0
SARNP	0	3	0	2
SART1	0	2.5	0	5
SART3	0	3	0	16
SAT1	0	0.5	0	0
SELENBP1	0	0	0	2
SENP3	0	0.5	0	0
SEPHS1	0	0	0	0.5
SET	0	2.5	0	2
SF3A1	0	0.5	0	2
SF3A2	0	0	0	2
SF3A3	0	2.5	0	2.5
SF3B1	0	4	0	6.5
SF3B2	0	11.5	0	15
SF3B4	0	0.5	0	0
SF3B6	0	1.5	0	2
SIN3A	0	1	0	2
SIN3B	0	0	0	1
SKI	0	3.5	0	6
SKIV2L2	0	1	0	3
SLC25A3	0	0.5	0	0
SLU7	0	0	0	1
SMARCA1	0	2.5	0	2.5
SMARCA2	0	5.5	0	8
SMARCA4	0	8	0	18
SMARCA5	0	0.5	0	1
SMARCB1	0	2	0	3
SMARCC1	0	5.5	0	7.5
SMARCC2	0	8	0	11
SMARCD1	0	0	0	1
SMARCD2	0	6	0	6.5
SMARCD3	0	3	0	3.5
SMARCE1	0	5	0	6.5
SMC1A	0	6	0	14
SMC2	0	1.5	0	1.5
SMC4	0	0.5	0	0
SMNDC1	0	2	0	1.5
SMU1	0	1	0	1.5
SNRNP200	0	10	0	12
SNRNP40	0	1	0	0
SNRNP70	0	1.5	0	2
SNRPA	0	0.5	0	1
SNRPA1	0	3	0	2
SNRPB	0	1	0	3.5
SNRPD1	0	0.5	0	1
SNRPD3	0	0.5	0	2
SNRPE	0	1.5	0	3
SNRPGP15	0	1	0	2
SNU13	0	2	0	1.5
SNW1	0	3.5	0	8
SNX2	0	1	0	0
SON	0	1	0	2
SPEN	0	0	0	0.5
SQSTM1	0	1	0	0
SREK1	0	1	0	1
SRI	0	0.5	0	0.5
SRP14	0	0.5	0	2
SRRM1	0	2.5	0	4
SRRM2	0	9	0	14
SRRT	0	1	0	0
SRSF10	0	2	0	2
SRSF11	0	3.5	0	3.5
SRSF12	0	1	0	1
SRSF2	0	2.5	0	3.5
SRSF3	0	1	0	0
SRSF7	0	3	0	2
SSB	0	3	0	3.5
SSBP2	0	0	0	0.5
SSRP1	0	3	0	4.5
STAG2	0	1	0	1
STAP2	0	0	0	1
STIP1	0	2.5	0	1
STMN1	0	1	0	0.5
STRBP	0	0	0	2
SUB1	0	3.5	0	4.5
SUCLG2	0	1	0	0
SUGP1	0	0	0	1
SUMO1	0	2	0	2
SUMO2	0	0	0	2
SUPT16H	0	4	0	5
SUPT5H	0	4	0	4
SUPT6H	0	1	0	1
SYMPK	0	2	0	1
SYNCRIP	0	1	0	1.5
SYNPR	0	0.5	0	0
TAF15	0	0	0	0.5
TARDBP	0	1	0	0
TBL1XR1	0	0	0	2
TBL3	0	1	0	2
TBX3	0	0	0	2
TCEA1	0	3.5	0	0.5
TCERG1	0	0	0	2
TDRD1	0	0	0	0.5
TEAD1	0	0	0	1
TFAP4	0	1	0	1.5
THOC3	0	1	0	0
THOC6	0	0.5	0	0
THRAP3	0	7	0	7.5
THUMPD1	0	0	0	1
TIA1	0	2	0	2
TIPIN	0	1	0	0
TLE1	0	3.5	0	5
TLE3	0	7	0	11.5
TMPO	0	5	0	4
TNPO1	0	1	0	0
TOE1	0	1	0	1
TOM1	0	0.5	0	0
TOP1MT	0	0.5	0	0.5
TOP2A	0	0.5	0	1
TOP2B	0	1	0	0
TOX4	0	0	0	0.5
TP53BP1	0	0	0	0.5
TPM3	0	1	0	0
TPR	0	0	0	1
TPX2	0	0	0	1.5
TRA2A	0	0	0	1
TRA2B	0	0	0	2
TRAP1	0	0	0	0.5
TRIM24	0	4	0	5
TRIM33	0	1	0	2
TRIM52	0	0.5	0	0
TRMT1	0	0	0	1
TRMT112	0	0	0	1
TRPS1	0	0	0	0.5
TRRAP	0	0.5	0	2
TSEN34	0	0	0	1
TST	0	1	0	0
TTLL1	0	1	0	0
TUFM	0	1	0	0.5
TXNDC17	0	1	0	0
TXNL1	0	0	0	1
U2AF1L5	0	0	0	0.5
U2AF2	0	0.5	0	0.5
U2SURP	0	3	0	8
UAP1	0	2	0	0
UBA1	0	4	0	1.5
UBE2M	0	3.5	0	2.5
UBE3A	0	0	0	1
UBN2	0	1	0	1
UBP1	0	1	0	0
UBR5	0	0	0	1
UBTF	0	0.5	0	12
UBXN1	0	0.5	0	1
UFD1	0	0	0	1
UGDH	0	2	0	3.5
UGT2B17	0	0	0	1
UHRF1	0	0	0	1
USP34	0	0	0	1
USP39	0	0.5	0	4
USP48	0	1	0	4
USP5	0	3	0	2
USP7	0	1	0	1.5
USP8	0	0.5	0	0
VARS	0	0.5	0	0
VBP1	0	0	0	1
VCP	0	2	0	1.5
VDAC2	0	0.5	0	1
VPS35	0	1	0	0
WAC	0	0	0	1
WARS	0	1	0	0
WBP11	0	0	0	2
WDHD1	0	0	0	8
WDR12	0	0	0	1
WDR18	0	0	0	0.5
WDR27	0	0	0	1
WDR3	0	0	0	3
WDR43	0	0	0	1
WDR5	0	1	0	3
WDR61	0	0	0	1.5
WDR82	0	1	0	4
WIZ	0	0	0	2
WRNIP1	0	0	0	2
XAB2	0	1	0	3
XPO5	0	0.5	0	0.5
XRCC6	0	12.5	0	15
YWHAG	0	0.5	0	0
YWHAQ	0	0.5	0	0
ZBTB21	0	0	0	1
ZC3H18	0	0	0	2
ZCCHC10	0	1	0	2
ZFP91	0	0	0	1
ZFR	0	0	0	1
ZHX2	0	0	0	0.5
ZKSCAN1	0	0	0	2
ZKSCAN5	0	0	0	1
ZMYM2	0	0	0	1
ZMYM3	0	0	0	1
ZMYM4	0	5	0	16.5
ZNF207	0	0	0	1.5
ZNF217	0	1	0	2.5
ZNF24	0	0	0	2
ZNF263	0	0.5	0	0
ZNF362	0	0	0	1
ZNF384	0	0	0	1
ZNF445	0	0	0	1
ZNF516	0	0	0	1
ZNF609	0	0	0	1
ZNF641	0	0.5	0	0
ZNF644	0	0	0	1
ZNF703	0	0	0	2

## Sheet: Table 3
GeneSymbol	CREB5	CREB3	FOXA1
MCM7	17	0	0
NUMA1	15.5	0	26
NONO	15	0.5	27.5
GTF2I	14.5	0	21
CHD4	13.5	0	20.5
GMPS	11.5	1	0
SMARCC2	11.5	0	0
USP7	11.5	0	14
PRMT1	11	0	16.5
DDX5	10.5	0	0
RUVBL2	10.5	0.5	0
TLE3	10	0	15.5
DDX46	9.5	0	0
SMARCA4	9.5	0	12
SMC1A	9.5	0	16.5
U2AF2	9.5	1.5	0
CDK1	9	2.5	0
HCFC1	9	28	5
HNRNPL	9	0	0
MCM3	9	0	0
SRRM2	9	0	8
SUPT16H	9	0	8
TTLL12	9	3	9.5
ADNP	8.5	0	6.5
MCM2	8.5	0	0
XPOT	8.5	1.5	16
CCAR2	8	0	16.5
CREB5	8	0	0
POGZ	8	0	5
RPA1	8	0	0
RUVBL1	8	1	17
SMC3	8	0	0
SMCHD1	8	0	18.5
ZMYM4	8	0	2
GRHL2	7.5	0	6.5
MCM5	7.5	0	0
RBM25	7.5	0.5	0
XPO5	7.5	0	6.5
HLTF	7	0	4
JUNB	7	0	0
KDM1A	7	0	13
MCM4	7	0	0
MCM6	7	0	0
NFIX	7	0	15
PUF60	7	0	0
SSB	7	0	11
FANCI	6.5	0	0.5
IRF2BPL	6.5	0	7
OGT	6.5	0.5	9
RTCB	6.5	1	16
SF3B2	6.5	0	0
SKIV2L2	6.5	0	2.5
SMARCA5	6.5	0	11.5
TOP2B	6.5	0	0.5
BUB3	6	0	0
DDX42	6	0	14
FEN1	6	0	9
MTA2	6	0	4.5
PDS5A	6	0	8.5
RBM39	6	0	0
SMARCA2	6	0	9.5
ACTL6A	5.5	0	9.5
AKR1A1	5.5	2	0
APEX1	5.5	1	0
ATF7	5.5	0	0
CBX3	5.5	0	0
CHD3	5.5	0	6
CSTF3	5.5	0	10.5
CTBP1	5.5	0	10
DDX23	5.5	0	6.5
ELAVL1	5.5	0	0
IRF2BP2	5.5	0	2
NSUN2	5.5	0	7
PDS5B	5.5	0	6
RBM4	5.5	0	11.5
RECQL	5.5	0	9.5
RNF20	5.5	0	8
SMU1	5.5	0	5
SRRT	5.5	0	5
TMPO	5.5	5.5	15
UBA1	5.5	1	0
ANP32E	5	0	2.5
DDB1	5	0	0
FKBP4	5	5	20
NELFB	5	0	3
PPP1R10	5	0	5.5
PRPF6	5	0	7
RTCA	5	0	5.5
SET	5	0	0
SMARCD2	5	0	11.5
TOP2A	5	0	0
XRN2	5	0	10.5
BCLAF1	4.5	0	8.5
CSTF2	4.5	0	5
CTBP2	4.5	0	4.5
HDAC2	4.5	0	0
HMGB1	4.5	0	0
HNRNPDL	4.5	0	0
IRF2BP1	4.5	0	1
JUND	4.5	0	0
OTUB1	4.5	1.5	10.5
PPM1G	4.5	0	7
RAN	4.5	3	0
RBM14	4.5	0	0
RCC1	4.5	0	6.5
SART3	4.5	0	15.5
SMARCE1	4.5	0	0
SNRNP70	4.5	0	10
SSRP1	4.5	0	3
ACLY	4	6	11
CDC5L	4	0	6.5
CHAMP1	4	0	0.5
DNAJA1	4	2.5	0
HDGF	4	0	0
HMGB3	4	0	0
INTS3	4	0	5
MTA1	4	0	7
NACC1	4	0	6
NCBP1	4	0	6
NFIA	4	0	7
NFIC	4	0	4
PBRM1	4	0	9.5
PSME3	4	0	4.5
RCC2	4	0	0
SMARCB1	4	0	0
SMARCC1	4	0	5.5
SNRNP40	4	0	5.5
SRSF6	4	0	0
TCEA1	4	0	0
THRAP3	4	0	10
ANP32A	3.5	0	0
AQR	3.5	0	0
ATXN10	3.5	3.5	3
C14orf166	3.5	0	5.5
CCAR1	3.5	0	3
DCAF7	3.5	0	1.5
DDX39B	3.5	0	0
DEK	3.5	0	0
DNAJC8	3.5	0	1.5
ESRRA	3.5	0	1.5
FAM98B	3.5	0	3.5
GNL3	3.5	0	1.5
HNRNPA1	3.5	0	0
INTS2	3.5	0	1
MBD3	3.5	0	1.5
POLR2A	3.5	0	1
PRDX5	3.5	3	0
PRPF19	3.5	0	0
RNF40	3.5	0	1.5
TARDBP	3.5	0	0
USP5	3.5	1.5	12.5
XAB2	3.5	0	1
ADAR	3	0	2.5
ATR	3	0	0
BLVRA	3	0.5	7
BRD2	3	0	0
BROX	3	3.5	3.5
CASZ1	3	0	6.5
CBX1	3	0	0
CBX5	3	0	0
CLIC1	3	0	0
CUL4A	3	0.5	5
DNAJC9	3	0	0
GATAD2B	3	0	3.5
GTF3C3	3	0	1.5
GTPBP4	3	0	1
HMBS	3	0.5	5
INTS1	3	0	0
KAT7	3	0	0
KDM3B	3	0	2
MAGOH	3	0	0
PHB2	3	4.5	0
PPP4R3A	3	0	0
RBM17	3	0	0
RFC2	3	0	0
RPRD1B	3	0	3
RXRA	3	0	0.5
SF3B4	3	0	8.5
SON	3	0	4
STIP1	3	3.5	0
TBX3	3	0	6.5
TXNRD1	3	0.5	6
UBR5	3	0	0
UBTF	3	0	0.5
USP39	3	0	1
ARID1A	2.5	0	7.5
ARID2	2.5	0	3.5
ATF2	2.5	0	0
BTAF1	2.5	0	1.5
CBR1	2.5	1.5	9.5
CRNKL1	2.5	0	0
CSNK2A1	2.5	0	0.5
DAZAP1	2.5	0	5
DDX21	2.5	0	0
DNAJA2	2.5	1	1.5
DNAJB1	2.5	0	0
EHMT2	2.5	0	0
EPM2AIP1	2.5	0	5.5
EXOSC2	2.5	0	1
FANCD2	2.5	0	0
HMGB1P1	2.5	0	0
HNRNPH3	2.5	0	9
HSPA1L	2.5	2	0
INTS9	2.5	0	2
IPO8	2.5	15.5	1
JUN	2.5	0	0
KDM5B	2.5	0	0
LMNB1	2.5	7.5	0
MGEA5	2.5	0.5	0
NIPBL	2.5	0	1.5
NR2F2	2.5	0	0.5
NT5DC1	2.5	0	1.5
NUP107	2.5	1	0
PAPSS1	2.5	0	4
PPIH	2.5	0	0.5
PPP2R1A	2.5	2.5	0
RAD50	2.5	0	3
RALY	2.5	0	0
RFC4	2.5	0	0
RFC5	2.5	0	0
RPA2	2.5	0	2.5
RPL9	2.5	3	0
SKI	2.5	0	1.5
SNRPB	2.5	0	4.5
SRP14	2.5	0	3.5
SUPT5H	2.5	0	2
TLE1	2.5	0	7.5
TNPO1	2.5	0.5	8.5
TRA2B	2.5	0	0
TRRAP	2.5	0	1.5
UBE2M	2.5	0.5	5.5
UGDH	2.5	0	4.5
ACP1	2	0	0
AR	2	0	2.5
ASH2L	2	0	0
ATRX	2	0	0
BAZ1A	2	0	0
CAPZA1	2	0.5	0
CDC73	2	0	2.5
CDK9	2	0	1
CIRBP	2	0.5	0
COPS4	2	0.5	6.5
CPSF2	2	0.5	1.5
DHX38	2	0	0
DHX40	2	0	1
DNMT1	2	0	0.5
ESD	2	0.5	2.5
FAM50A	2	0	1.5
FOXA1	2	0	14
GSR	2	0.5	2
GTF3C1	2	0	0.5
GTF3C4	2	0	1
HMGB2	2	0	0
HNRNPUL2	2	0	0
HOXB13	2	0	4
KIAA1429	2	0	0
LARP7	2	0	3
LDB1	2	0	1.5
LSM7	2	0	1
MED1	2	0	0
NANS	2	0	5.5
NAT10	2	0	0
NCAPD3	2	0	0
NCAPG2	2	0	0
NCOR2	2	0	0
NELFCD	2	0	0.5
NOP56	2	0	2.5
NOSIP	2	0	1.5
PABPN1	2	0	0
PAF1	2	0	0.5
PDCD5	2	0	4
PIN1	2	0.5	4
PLAA	2	0	3.5
POLD1	2	0	0
PPA1	2	0	0
PRIM2	2	0	0
PRPF4	2	0	0
QRICH1	2	0	0.5
RAD21	2	0	2.5
RBBP7	2	0	1.5
RBM12	2	0	4
RBM3	2	0	0
RCOR1	2	0	5.5
RPL11	2	2	0
SNRPD2	2	0	0
SNRPE	2	0	3
SRSF5	2	0	0
SRSF8	2	0	0
TBL3	2	0	0
TIPRL	2	0	0
TRMT1L	2	0	1
TXNL1	2	0	0
WBP11	2	0	2.5
WIZ	2	0	0
YARS	2	1.5	0
YLPM1	2	0	10.5
ZNF24	2	0	0
ACIN1	1.5	0	1
ADSL	1.5	1.5	2
AES	1.5	0	0
ANAPC1	1.5	0	0
BANF1	1.5	0.5	0
BAZ1B	1.5	0	2
BCAS2	1.5	0	1
BOP1	1.5	0.5	2
C7orf26	1.5	0	0
CDK13	1.5	0	0
CHD5	1.5	0	3.5
CHD8	1.5	0	0
COASY	1.5	1	0.5
CPSF1	1.5	0	1
CPSF7	1.5	0	4.5
CREBBP	1.5	0	1
CSRP1	1.5	1	0
CUL1	1.5	0.5	1.5
DHX16	1.5	0	1
DHX8	1.5	0	0
EIF5A	1.5	4	0
ELAC2	1.5	0	2
EP400	1.5	0	0
EXOSC10	1.5	0	0.5
EYA3	1.5	0	0.5
FIGNL1	1.5	0	0
FLAD1	1.5	0	1
GID8	1.5	0	0
GLRX3	1.5	0.5	0.5
GMEB2	1.5	0	0
GSE1	1.5	0	4
GTF2B	1.5	0	0.5
GTF2E2	1.5	0	1
GTF3C5	1.5	0	0
HEATR1	1.5	0	0
HMG20B	1.5	0	3.5
HNF1B	1.5	0	0
HSPA1B	1.5	1	0
INTS14	1.5	0	2.5
INTS4	1.5	0	1
IPO5	1.5	2.5	1
KDM6A	1.5	0	6.5
KIF4A	1.5	0	0
LIG3	1.5	0	2.5
LRRC41	1.5	0	2.5
MAPK14	1.5	0.5	0
MED23	1.5	0	0.5
MMS19	1.5	1	1
MRE11	1.5	0	0.5
NAMPT	1.5	0	7
NAP1L1	1.5	6	0
NASP	1.5	0	0
NELFE	1.5	0	3
NOL6	1.5	0	0
NXF1	1.5	0	2
ORC3	1.5	0	1.5
PAPOLA	1.5	0	0
PCNA	1.5	0	0
PDCD4	1.5	0	1
PDCD6	1.5	0	0
PFDN2	1.5	0.5	5.5
PFDN5	1.5	0	0
PIAS4	1.5	0	0
PMVK	1.5	0.5	1.5
PNN	1.5	0	0.5
POLR1C	1.5	0	1
PPME1	1.5	0	0.5
PRPF31	1.5	0	0
PSPC1	1.5	0	7
RAI1	1.5	0	0.5
RB1	1.5	0	0
RFC1	1.5	0	0
RIOX2	1.5	0	0
RREB1	1.5	0	1
RSF1	1.5	0	0
RTF1	1.5	0	1
SAMHD1	1.5	0	2.5
SARNP	1.5	0	0
SART1	1.5	0	2.5
SF3B6	1.5	0	4
SKP1	1.5	1.5	0
SLFN5	1.5	0	2
SNRPB2	1.5	0	5
SNRPF	1.5	0	0
SNW1	1.5	0	1
SRRM1	1.5	0	1.5
SRSF11	1.5	0	2
TFAP4	1.5	0	0
TRA2A	1.5	0	2.5
TRIM33	1.5	0	0.5
TROVE2	1.5	0	0.5
TSEN34	1.5	0	0
TXNDC17	1.5	0	2
UBE2L3	1.5	0	6.5
UROD	1.5	0.5	1.5
USP34	1.5	0	0
VDAC2	1.5	4	0
WDR12	1.5	0	0
WDR5	1.5	0	2
XPO6	1.5	0	0
ZMYND8	1.5	0	0
ZNF703	1.5	0	0
ZRANB2	1.5	0	4.5
AKAP8	1	0	1.5
ANP32B	1	0	0
ANXA7	1	0	0
AP1B1	1	1.5	2
APOBEC3A	1	0	0
APTX	1	0	0
ARID1B	1	0	3.5
ARID5B	1	0	0
ATAD2	1	0	0
ATP5C1	1	1	2.5
BAG5	1	1	0
BEND3	1	0	0
BLVRB	1	1.5	4.5
BPNT1	1	0	2
BRAT1	1	0	0
BRD3	1	0	0
BRD4	1	0	1
C7orf50	1	0	2.5
CAP1	1	1.5	0
CCDC106	1	0	0
CDC37	1	1	0
CDK2AP1	1	0	2
CENPF	1	0	0
CHAF1B	1	0	0.5
CHERP	1	0	0
COPA	1	9	0
COPS2	1	0	0
COPS7B	1	0	1
CRADD	1	0.5	0
DCUN1D5	1	0	0
DCXR	1	2	1
DNAJC17	1	0	1
DRAP1	1	0	2.5
EDF1	1	0.5	1
EEF1G	1	1	0
EIF6	1	0	1.5
ELOA	1	0	0
EMG1	1	0	0
ERH	1	0	0
ETV6	1	0	0
FBRS	1	0	0.5
FDPS	1	0	0
FIP1L1	1	0	4
FOXO3	1	0	0
FTO	1	0	2.5
GAMT	1	0	2
GARS	1	1	0
GRB2	1	0	0.5
GSG2	1	0	0
GTF2F1	1	0	1
HNRNPC	1	0	0
HSPA9	1	0	0
HTATSF1	1	0	2.5
IDH1	1	0.5	0
INTS13	1	0	0
INTS6	1	0	1
IPO11	1	0	0
IPO7	1	11.5	0
IPO9	1	0.5	0
ISOC1	1	0.5	0
ISY1	1	0	1.5
JMJD1C	1	0	0
KIF2C	1	0	0
KPNA2	1	1.5	0
KPNA4	1	1	0
LIN9	1	0	0
LMNA	1	4.5	0
LSM4	1	0	1
MAGEA4	1	0	1
MASTL	1	0	0
MED14	1	0	0
MORC2	1	0	0
MORF4L1	1	0	0.5
MORF4L2	1	0	0
MTAP	1	0	0.5
MYBBP1A	1	0	0
NCAPD2	1	0	0
NCOA1	1	0	1
NCOR1	1	0	2
NELFA	1	0	0.5
NLE1	1	0	2.5
NOC4L	1	0	0
NOLC1	1	0	0
NOP9	1	0	0.5
NVL	1	0	1
OGFOD1	1	0	0
PAXIP1	1	0	0
PBX2	1	0	0
PCBD1	1	0.5	0
PCF11	1	0	0
PCGF6	1	0	0
PCIF1	1	0	0.5
PCNP	1	0	2.5
PCYT1A	1	0	0
PDE12	1	0.5	5.5
PES1	1	0	0
PFN2	1	0	0
PGPEP1	1	0.5	1
PIN4	1	0	1.5
PMS2	1	0	1.5
POLE	1	0	0
PPID	1	0.5	0
PPIL4	1	0	1
PPP1R8	1	0	1.5
PRCC	1	0	1
PRKAG1	1	1	0
PSMD10	1	0	2
PTBP2	1	0	0
PUS7	1	0	0
PWP2	1	0	0
RAD54L2	1	0	0
RASA1	1	0.5	0
RBBP5	1	0	0
RBM7	1	0	0
RIF1	1	0	0
RNH1	1	1	5
RPL17	1	0.5	0
RPL3	1	2	0
RPLP0P6	1	2.5	0
RPLP2	1	1	0
RPN1	1	18	0
RPP40	1	0	0
RPRD2	1	0	4
RPS10P5	1	0.5	0.5
RPS15A	1	1.5	0
RPS27	1	1	2
RPS28	1	1.5	0
RPS6	1	1	0
RPSA	1	2.5	0
RSU1	1	0	0
SAP18	1	0	2.5
SBNO1	1	0	2.5
SCCPDH	1	0.5	0
SDCBP	1	0	0
SELENOH	1	0	0
SETD1A	1	0	0
SF3A2	1	0	1
SIN3A	1	0	3
SMAP	1	0	2.5
SMARCD1	1	0	0.5
SMC2	1	0	0
SMC4	1	0	0.5
SNRPC	1	0	1.5
SNRPD3	1	1	4
SNRPGP15	1	0	2
SRBD1	1	0	0
SRI	1	0	0.5
SRSF12	1	0	2
SRSF3	1	0	5.5
ST13	1	0.5	0
STAG1	1	0	0
TAF2	1	0	0
TCERG1	1	0	1.5
THOC1	1	0	1
THOC2	1	0	1.5
THOC5	1	0	0
THOC6	1	0	1.5
TIGAR	1	0	1
TRIM24	1	0	0
TRMT1	1	0	1.5
TRMT112	1	0	2.5
TSNAX	1	0	0
UBE2T	1	0	0
UBE3C	1	0.5	0
USP14	1	0.5	2.5
USP48	1	0	0.5
UTP20	1	0	0
UVSSA	1	0	1
VBP1	1	1	0
VDAC3	1	1	6.5
WDHD1	1	0	1.5
WDR70	1	0	0
WDR82	1	0	2
YWHAG	1	1	0
YY1	1	0	2.5
ZBTB21	1	0	0
ZNF207	1	0	4.5
ZNF217	1	0	0.5
ZNF592	1	0	0
ZNF687	1	0	0
ABCD3	0.5	1.5	0.5
AFF4	0.5	0	0
AHNAK	0.5	0	0
AIP	0.5	0.5	0
ALKBH5	0.5	0	0.5
ANXA11	0.5	0	0
AP2B1	0.5	1	0
AP3D1	0.5	0	0
APOBEC3B	0.5	0	0
APRT	0.5	0.5	0
ARL6IP4	0.5	0	1.5
ATIC	0.5	2	0
ATN1	0.5	0	5.5
ATP1A1	0.5	1.5	0
ATP2A1	0.5	11.5	1.5
ATP6V1F	0.5	1	0
BAP1	0.5	0	0
BCCIP	0.5	0	0
BCL6	0.5	0	0
BCL7C	0.5	0	0
BCOR	0.5	0	1.5
BID	0.5	0.5	0.5
BOLA2	0.5	0	2
C5orf51	0.5	0	0
CACYBP	0.5	0	0.5
CCDC47	0.5	8	0
CCNH	0.5	0	0
CDC45	0.5	0	0
CDK11A	0.5	0	0
CDK5	0.5	0	0
CEBPG	0.5	0	0
CELF1	0.5	0	0
CENPX	0.5	0	0
CETN2	0.5	0	0
CFAP20	0.5	0	0
CFDP1	0.5	0	0.5
CGGBP1	0.5	0	0
CHD1	0.5	0	0
CHRAC1	0.5	0	0
CHTOP	0.5	0	2
CIAPIN1	0.5	0	0
CIITA	0.5	0	0
CKMT1A	0.5	0.5	0
CLASP1	0.5	0	0
CLHC1	0.5	0	0
CLK3	0.5	0	1
CLNS1A	0.5	0	1.5
COIL	0.5	0	0
COMT	0.5	0.5	0
COPB2	0.5	1.5	0.5
COPE	0.5	1.5	0.5
COPS5	0.5	0	0
COPS7A	0.5	0	1
COPS8	0.5	0	0
CRCP	0.5	0	0
CRKL	0.5	0	0
CSTB	0.5	0	1
CSTF2T	0.5	0	0
CTNNBL1	0.5	0	3.5
CTR9	0.5	0	1
CUL3	0.5	0	1.5
CUL4B	0.5	0	2
CUTA	0.5	0	0
CUX1	0.5	0	0
CWC22	0.5	0	0
CXorf56	0.5	0	0
DDI2	0.5	0	1
DDX18	0.5	0	0
DDX24	0.5	0	0
DKFZp686A11192	0.5	0	0
DNAJC7	0.5	0	1
DNTTIP1	0.5	0	0
DPF2	0.5	0	4.5
DPH1	0.5	0	0
DPH2	0.5	0	0
DPM1	0.5	2.5	0
DSCC1	0.5	0	0
DUS1L	0.5	0	0.5
DUS3L	0.5	0	0.5
DUSP3	0.5	0	1.5
DYNLL1	0.5	0	0
EEF1B2	0.5	2	0
EEF1D	0.5	0	0
EIF1	0.5	0.5	2
EIF3F	0.5	0.5	0
EIF5	0.5	2	0
env	0.5	0	0
EPRS	0.5	1.5	0
ERCC1	0.5	0	1
ERCC4	0.5	0	0.5
ESRP1	0.5	0	0
ESRP2	0.5	0	0
ESYT1	0.5	4.5	0
EZR	0.5	1	0
FADD	0.5	0	0
FBXO7	0.5	0	0
FKBP5	0.5	0	1
FOXJ3	0.5	0	0
FOXP1	0.5	0	0.5
GCDH	0.5	0	0.5
GFPT1	0.5	0.5	1
GNB2	0.5	1.5	0
GNL3L	0.5	0	0
GOLPH3	0.5	1	0
GOLPH3L	0.5	0.5	0.5
GPS1	0.5	0	1.5
GPX4	0.5	0	0
GRHPR	0.5	0.5	5
GTF2E1	0.5	0	0
GTF2H1	0.5	0	0
GTF2H2C	0.5	0	0
GTF2H3	0.5	0	0
H1FX	0.5	0	0
HACD3	0.5	5.5	0
hCG_21098	0.5	0	0
HDAC1	0.5	0	1.5
HDGFL2	0.5	0	0
HEATR3	0.5	0	0
HELLS	0.5	0	0
HGD	0.5	0	0
HLA-B	0.5	0	1
HLA-C	0.5	0	0
HMCES	0.5	0	1.5
HNRNPLL	0.5	0	0
HOXC13	0.5	0	3
IDH3G	0.5	0	0
IGLC2	0.5	0.5	0
IK	0.5	0	2
IMPDH2	0.5	0.5	5.5
JDP2	0.5	0	0
KAT2A	0.5	0	0
KBTBD3	0.5	0	0
KBTBD7	0.5	0	0
KIF18B	0.5	0	0
KMT2D	0.5	0	1.5
KRI1	0.5	0	0.5
LAGE3	0.5	0	0
LAS1L	0.5	0	0.5
LCMT1	0.5	0	0
LEO1	0.5	0	0.5
LRRTM2	0.5	0.5	1
LYAR	0.5	0	0
MAGEA3	0.5	0	0
MAT2A	0.5	0	0
MCRS1	0.5	0	0
ME1	0.5	0	0
MED11	0.5	0	0
MED21	0.5	0	0
MED30	0.5	0	0
METTL1	0.5	0	0
METTL3	0.5	0	0
MKLN1	0.5	0	0
MRFAP1	0.5	0	0
MSANTD2	0.5	0	0
MSRB3	0.5	0	0
MYH9	0.5	4	0
MYO6	0.5	1	1.5
NACC2	0.5	0	0.5
NARS	0.5	5.5	0
NFIB	0.5	0	0
NMRAL1	0.5	0	0
NPLOC4	0.5	0	0
NQO1	0.5	0	1
NSMCE4A	0.5	0	0
NUP50	0.5	0	0
NXN	0.5	0	0.5
ORC4	0.5	0	0
OSTF1	0.5	0	0
PAFAH1B3	0.5	0.5	0
PBK	0.5	0	0
PBX1	0.5	0	0
PCMT1	0.5	1	0
PCYT2	0.5	0	0
PDXK	0.5	2	0
PEF1	0.5	0	0.5
PGAM1	0.5	0.5	0
PHAX	0.5	0	0
PHF2	0.5	0	0
PHF21A	0.5	0	0.5
PIAS1	0.5	0	0.5
PIAS2	0.5	0	2.5
PMS1	0.5	0	0
PNP	0.5	0	0
POLA1	0.5	0	0
POLA2	0.5	0	0
POLR2C	0.5	0	0
POLR2G	0.5	0	0
POLR2I	0.5	0	0
POLR3A	0.5	0	0
PPIG	0.5	0	0
PPP1R7	0.5	0	0
PPP2CA	0.5	0	2.5
PPP2R5E	0.5	0	0
PPP4R3B	0.5	0	0
PPWD1	0.5	0	0
PQBP1	0.5	0	1.5
PRB1	0.5	0	0
PRMT5	0.5	0	5.5
PRPF38A	0.5	0	1
PRPF38B	0.5	0	0
PRR12	0.5	0	2.5
PSIP1	0.5	0	0
PSKH1	0.5	0.5	0
PSMA4	0.5	0	0
PSMD12	0.5	0.5	2.5
PSMD4	0.5	0	0
PTPA	0.5	0.5	2
PUDP	0.5	0	0
RAD23A	0.5	0	0
RAD23B	0.5	0.5	0
RBM28	0.5	0	0
RBM5	0.5	0	0.5
REPIN1	0.5	0	0
RFC3	0.5	0	2
RGS10	0.5	0	0.5
RHOC	0.5	0.5	0
RING1	0.5	0	1
RPL10	0.5	1.5	0
RPL28	0.5	0	1
RPL37A	0.5	0.5	0
RPL38	0.5	1.5	1
RPP30	0.5	0	0
RPRD1A	0.5	0	0
RPS17	0.5	1.5	0
RRN3P2	0.5	0	0
RSL1D1	0.5	0	0
RTFDC1	0.5	0	1
S100A11	0.5	0	2
SAAL1	0.5	0	0.5
SAE1	0.5	0	0
SAP30BP	0.5	0	0
SAR1A	0.5	4	2.5
SCAI	0.5	0	1
SDAD1	0.5	0	0
SENP3	0.5	0	0
SERBP1	0.5	0.5	1.5
SH3GL3	0.5	0	0
SH3GLB2	0.5	0	0
SHOC2	0.5	0	0
SIN3B	0.5	0	0
SIRT1	0.5	0	0
SMAD4	0.5	0	0
SMC6	0.5	0	0
SMS	0.5	0	0.5
SND1	0.5	18	0
SNU13	0.5	0	0
SPR	0.5	0	0
SRM	0.5	0	0
SRR	0.5	0	0.5
SRSF10	0.5	0	0
SSBP3	0.5	0	1
STAP2	0.5	0	0
STMN1	0.5	0	0
STXBP2	0.5	0	0
SUGP2	0.5	0	3
SUPT3H	0.5	0	0
TAF10	0.5	0	0
TAF15	0.5	0	0
TAF5L	0.5	0	0.5
TAF8	0.5	0	0
TARS	0.5	0	0.5
TBCEL	0.5	0	0
TDP1	0.5	0	0
TERF2IP	0.5	0	1
TFRC	0.5	1	1.5
THUMPD1	0.5	0	1
TK1	0.5	0	0
TOE1	0.5	0	0
TOP1MT	0.5	0	0
TOX4	0.5	0	0.5
TRAPPC3	0.5	0	0
TRIM25	0.5	0.5	0.5
TRIP12	0.5	0	0
TRMT5	0.5	0	1
TTC23L	0.5	0	0
TUFM	0.5	0.5	0
TUT1	0.5	0	0
TWF1	0.5	0	0
U2AF1L5	0.5	0	1.5
UBA2	0.5	0	0
UBE2C	0.5	0	0
UBE2D2	0.5	0	0
UBE2N	0.5	0	0
UBE2S	0.5	0	0
UCK2	0.5	0	0
UGT2B15	0.5	11	9
ULK3	0.5	0	0
USP11	0.5	0	0
UTP18	0.5	0	0
WDR3	0.5	0	0
WDR36	0.5	0	0
WDR5B	0.5	0	0
WRN	0.5	0	0
WTAP	0.5	0	0
YEATS4	0.5	0	0
YWHAB	0.5	0	0
YY2	0.5	0	0
ZBTB40	0.5	0	0
ZC3H13	0.5	0	0
ZC3HC1	0.5	0	0
ZFHX3	0.5	0	0
ZFP91	0.5	0	0
ZFR	0.5	0.5	4.5
ZIC2	0.5	0	0
ZKSCAN1	0.5	0	0
ZMYM3	0.5	0	0
ZNF141	0.5	0	0.5
ZNF316	0.5	0	0
ZNF638	0.5	0	0
ZNF773	0.5	0	0
43525	0	0.5	0
43530	0	0.5	0
AAAS	0	1.5	0
ABCC9	0	0	0.5
ABCE1	0	0.5	4.5
ABHD10	0	0	5
ABHD11	0	0	0.5
ABHD2	0	0.5	0
ABHD6	0	0.5	0
ABLIM1	0	0	3
ACAA1	0	0	1.5
ACACA	0	0.5	0
ACAD9	0	0.5	0
ACADM	0	0	1
ACADSB	0	0	3.5
ACADVL	0	0.5	0
ACAT2	0	0	1
ACBD3	0	0.5	0
ACOT13	0	0	1.5
ACOT2	0	0	4
ACOX1	0	0	1
ACSL1	0	2.5	0
ACSL3	0	9.5	0
ACSL5	0	0.5	0
ACTR1A	0	0	0.5
ACY1	0	0	0.5
ADAMTS5	0	0	0.5
ADSS	0	0	1.5
AGL	0	0.5	0
AGPAT2	0	0.5	0
AGTRAP	0	0	1
AHSA1	0	0	1
AIDA	0	0	2.5
AIFM1	0	0.5	14.5
AIMP2	0	0.5	0.5
AKAP8L	0	0	1
ALDH18A1	0	0.5	4.5
ALDH2	0	0	1
ALDH3A2	0	4.5	0.5
ALDH6A1	0	0	4.5
ALDOC	0	2	0
ALG1	0	3.5	0
ALG11	0	1	0
ALG8	0	1	0
ALG9	0	0.5	0
AMFR	0	0.5	0
ANK3	0	1.5	2
ANKFY1	0	0.5	0
ANXA4	0	0	11
ANXA6	0	0.5	2.5
AP1G1	0	0.5	0
AP1S1	0	0	0.5
APMAP	0	2	0
APOL2	0	0.5	0
ARAF	0	0.5	0
ARF4	0	4.5	0
ARHGAP1	0	1.5	0
ARIH1	0	0	0.5
ARL1	0	0	2
ARL2	0	0.5	0.5
ARL6IP1	0	0.5	0
ARL6IP5	0	4.5	0.5
ASNS	0	0	0.5
ASPH	0	2.5	0
ASS1	0	0.5	15
ATAD1	0	0.5	0
ATAD3A	0	0	1
ATE1	0	0	1
ATL2	0	0.5	0
ATL3	0	3	0
ATP13A1	0	10.5	0
ATP1B1	0	0	0.5
ATP5D	0	0	1
ATP5F1	0	0	2.5
ATP5J2	0	1.5	0
ATP6V1A	0	0	1
ATP6V1B2	0	0.5	0
ATP6V1C1	0	0.5	0
ATP6V1H	0	0.5	0
BCAP31	0	0.5	0
BCHE	0	0	0.5
BCL9L	0	0	3
BET1	0	0.5	0
BNIP1	0	1	0
BRCA1	0	0	0.5
BRD7	0	0	0.5
BRI3BP	0	2	1
BSCL2	0	0.5	0
BTF3L4	0	0	0.5
BZW1	0	1.5	0
BZW2	0	0.5	0
C11orf98	0	0	1
C12orf10	0	0	0.5
C16orf58	0	1	0
C4A	0	0	1
C8orf82	0	0	0.5
C9orf142	0	0	0.5
C9orf85	0	0.5	0
CAD	0	0	8.5
CALM2	0	0.5	0
CALR	0	18	0
CAMLG	0	1	0
CANX	0	8.5	0
CARS2	0	0.5	0
CAT	0	1	0
CBFB	0	0	1
CBSL	0	0	7.5
CC2D1A	0	1.5	0
CCDC137	0	0.5	0
CCDC170	0	0.5	0
CCDC73	0	0	1
CCDC90B	0	0	1.5
CCS	0	0	1
CCT6B	0	0	7.5
CD2BP2	0	0	3
CDK5RAP3	0	0	0.5
CDKN2AIPNL	0	0	0.5
CERS4	0	1	0
CHID1	0	0.5	5
CHMP5	0	0	1
CHMP7	0	2	0
CHORDC1	0	0	0.5
CHTF18	0	0	0.5
CHTF8	0	0	1
CIB1	0	0.5	0
CISD2	0	0.5	0
CIT	0	0.5	0
CKAP4	0	0.5	11
CLCC1	0	0.5	0
CLPB	0	0	15.5
CLPP	0	0	3.5
CLPX	0	0	10.5
CMBL	0	0	11
CNDP2	0	0	12
CNOT11	0	0.5	0
CNPY2	0	0.5	1.5
CNPY3	0	0.5	0.5
COLGALT1	0	0	5
COMMD2	0	0.5	0
COPB1	0	0	0.5
COPG1	0	1.5	0.5
COPG2	0	0.5	0
COPS3	0	0	0.5
COPS6	0	0	2
COPZ1	0	0	0.5
COX5A	0	0	2.5
COX5B	0	0	1.5
COX7A2	0	0.5	0
CPNE1	0	0	5.5
CPT1A	0	4	0
CPT2	0	0	1
CREB3	0	23	0
CREB3L4	0	8.5	0
CRHBP	0	0	0.5
CSDE1	0	1.5	0
CSTF1	0	0	5
CTAGE5	0	0	1
CTNNA1	0	0	11
CTPS2	0	0	1
CTTN	0	0.5	0.5
CYB5A	0	0.5	0
CYB5R3	0	2	0
CYFIP1	0	0.5	0
CYP4F2	0	0.5	0
CYP51A1	0	4.5	0
DAD1	0	1.5	0
DAP3	0	0	3.5
DCAF11	0	0	0.5
DCAF13	0	0	0.5
DCAKD	0	3	0
DCTN2	0	0	0.5
DDOST	0	10	0
DDRGK1	0	6.5	0
DDX1	0	0	24.5
DDX47	0	0	1.5
DDX6	0	1	0
DFFA	0	0	0.5
DHCR24	0	6.5	0
DHCR7	0	5	0
DHFR	0	0	1
DHRS13	0	2	0
DHRS7	0	5.5	0
DHRS7B	0	4.5	0
DHX29	0	1	0
DIDO1	0	0	2.5
DLD	0	0.5	8
DLEC1	0	0	0.5
DMAP1	0	0	1
DMBT1	0	0	0.5
DMD	0	0	0.5
DNAJA3	0	0	1
DNAJB11	0	0	8.5
DNAJB12	0	5.5	0
DNAJC1	0	3	0
DNAJC10	0	0	2.5
DNAJC16	0	2.5	0
DNAJC25	0	1.5	0
DNAJC3	0	0	4
DNPEP	0	0.5	2
DOCK6	0	0.5	0
DOCK7	0	1.5	0
DOHH	0	0	0.5
DOLK	0	2	0
DOLPP1	0	2	0
DOPEY2	0	1	0
DRG2	0	0.5	0
DUSP23	0	0	0.5
DUT	0	0	0.5
DYNC1H1	0	1	0
ECHDC3	0	0	0.5
ECHS1	0	0.5	1.5
ECI1	0	0	2.5
ECI2	0	0	0.5
EFTUD2	0	0	18.5
EHMT1	0	0	1
EIF2S1	0	0.5	0
EIF2S3L	0	0.5	0
EIF3B	0	0	0.5
EIF3E	0	0.5	0
EIF3I	0	0	1.5
EIF3M	0	0.5	0
EIF4B	0	0.5	1
EIF4G1	0	2	0.5
EIF4G2	0	0.5	1
ELMOD2	0	1	0
ELOC	0	0	2
EMC1	0	6.5	1.5
EMC2	0	2.5	0
EMC9	0	1	0
EMD	0	7	0
ENAH	0	0	1
EP300	0	0	2.5
EPHX1	0	6	3.5
EPPK1	0	0	2
EPS8L2	0	0.5	0
ERGIC1	0	1	0
ERLIN1	0	0.5	3
ERLIN2	0	2	4.5
ERO1A	0	0	1.5
ERO1B	0	0	2
ERP29	0	4	0
ERP44	0	1	0
ETF1	0	2.5	1
ETFA	0	0	16
ETFB	0	2	7.5
EXOSC6	0	0	1
EXOSC8	0	0	1
F5	0	0	5.5
FAAH	0	8	0
FADS2	0	6	0
FAF2	0	6	0
FAHD2A	0	0	1
FAM171A2	0	0	1.5
FAM8A1	0	0.5	0
FAM98A	0	0	0.5
FARSA	0	0.5	0
FAU	0	0	0.5
FBL	0	0	1.5
FDFT1	0	2	0
FECH	0	0	1
FEV	0	0.5	0
FH	0	1	0
FIS1	0	0.5	0
FITM2	0	1	0
FKBP10	0	0	6
FKBP11	0	0.5	0
FKBP1A	0	0	1
FKBP2	0	1.5	3
FKBP3	0	1	0
FKBP8	0	4.5	0
FLNB	0	1.5	0
FLYWCH2	0	0	1
FNDC3B	0	1	0
FNTA	0	0	1
FOLH1	0	0.5	9
FOLH1B	0	1.5	7.5
FOXP4	0	0	0.5
FUBP3	0	0	3
FXR1	0	1	0
GAK	0	1	0.5
GALK1	0	0	1.5
GANAB	0	8	0
GART	0	0.5	0
GATAD2A	0	0	1.5
GBE1	0	0	0.5
GCN1	0	0	9
GCN1L1	0	0.5	0
GDPD1	0	1	0
GIT1	0	0.5	0
GLS	0	0	1.5
GLUD1	0	0	2
GOSR2	0	0.5	0
GPAA1	0	1	0
GPBP1L1	0	0	0.5
GPD1L	0	0.5	0
GRAMD1A	0	1	0
GRB10	0	0.5	1
GRIK2	0	0.5	0
GRPEL1	0	0	2
GRSF1	0	0	0.5
GSPT1	0	0.5	0
GTF2A1	0	0	1
GTF2F2	0	0	2.5
GUSB	0	0	0.5
GYS1	0	1	0
HADH	0	0	3.5
HADHA	0	1.5	0
HADHB	0	0	4
HAT1	0	0	5
HAX1	0	0.5	8
HBA1	0	0	1
HBB	0	0.5	0
HBS1L	0	0.5	0
HCFC2	0	1	0
HDAC6	0	0.5	0
HDHD5	0	0	2.5
HDLBP	0	8.5	0
HEYL	0	0	0.5
HINT1	0	0	0.5
HINT2	0	0	2.5
HK1	0	1	0
HLA-A	0	0	0.5
HM13	0	1	0
HNRNPH1	0	0	10.5
HNRNPM	0	0	1
HNRNPUL1	0	0	4.5
HOOK2	0	0.5	0
HOXD10	0	0	0.5
HSBP1	0	0.5	0
HSD11B2	0	5.5	0
HSD17B12	0	3	0
HSD17B4	0	0	5.5
HSD3B7	0	1.5	0
HSP90AA2P	0	1	0
HSP90B1	0	0	1
HSPA8	0	0.5	0
HSPB11	0	0	1
HSPE1	0	1	0
HSPH1	0	1	0
HYOU1	0	3.5	0
IARS	0	0	2
IARS2	0	0	0.5
ICMT	0	1	0
IDH3A	0	0.5	0
IER3IP1	0	0.5	0
IGF2R	0	0	2
ILVBL	0	5.5	0.5
INF2	0	0.5	0
IPO4	0	3	0
ISOC2	0	0	0.5
ITGB1	0	1	0
ITPK1	0	0	0.5
JAGN1	0	1	0
JPT1	0	0	2.5
JPT2	0	0	1
KARS	0	0	0.5
KCMF1	0	0	9
KDELR2	0	0.5	0
KIF5A	0	0.5	0
KPNA5	0	0	0.5
KTN1	0	1	0
LAMA5	0	0	1
LAMB2	0	0	7
LAMC1	0	0	1
LAP3	0	0	4.5
LARP1	0	0	1
LARS	0	0	3.5
LBR	0	0.5	0
LDHB	0	0	9.5
LEMD2	0	0.5	0
LENG9	0	0	1
LETM1	0	0	0.5
LMAN1	0	1	9
LMAN2	0	0.5	0
LMF2	0	2	0
LMNB2	0	0.5	0
LPCAT1	0	2.5	0
LPCAT3	0	4	0
LPCAT4	0	0.5	0
LRPAP1	0	0	2.5
LRRC37A2	0	0	0.5
LRRC59	0	7	0
LRRC8D	0	0	0.5
LSM14B	0	0	0.5
LSS	0	0.5	0
LTA4H	0	0	6
LTF	0	0	0.5
LUC7L	0	0	2
LYPLA1	0	0	1
LYPLA2	0	0.5	0
LYPLAL1	0	0	2
MACROD1	0	0	1
MAGEA10	0	0	2
MAGT1	0	1.5	0
MANF	0	0	2.5
MAOA	0	0.5	2
MAP1A	0	0	1
MAP1B	0	0	3.5
MAP2K1	0	0.5	0
MAP2K3	0	0	2
MAP4	0	0.5	0
MAPK1	0	0	0.5
MBNL1	0	0	0.5
MBOAT7	0	3	0
MCTS1	0	0	4
ME2	0	0	0.5
MEMO1	0	0	1
METTL13	0	0.5	0
METTL16	0	0	0.5
METTL7A	0	1	0
MFAP1	0	0	2
MFSD10	0	0.5	0
MGST1	0	2.5	0
MIA3	0	2.5	3.5
MIF	0	0	1.5
MIGA1	0	0.5	0
MLEC	0	7	7
MLH1	0	0	4
MMGT1	0	0.5	0
MNAT1	0	0	0.5
MOGS	0	4	0
MOSPD3	0	0.5	0
MPLKIP	0	0	1
MPST	0	0.5	2
MPV17	0	0.5	0
MRPL22	0	0	0.5
MRPL28	0	0.5	1.5
MRPL37	0	0	0.5
MRPL49	0	0	1
MRPS22	0	0	0.5
MRPS31	0	0	2
MRPS35	0	0	1
MSI2	0	0	1
MTA3	0	0	1
MTCH2	0	0.5	3
MTDH	0	5.5	0
MTERF1	0	0	0.5
MUC5AC	0	0	0.5
MYDGF	0	0	1
MYEF2	0	0	3
MYH10	0	0	0.5
MYL12A	0	1	0
MYO15B	0	0	0.5
MYO1C	0	0	1.5
MYSM1	0	0	0.5
NADK2	0	0	0.5
NAP1L4	0	5	0
NAPA	0	0.5	2
NAPG	0	0.5	0
NBAS	0	0.5	0
NCAM2	0	0	0.5
NCBP2	0	0	1.5
NCBP3	0	0	2.5
NCLN	0	1.5	1
NCOA2	0	0	1
NCOA5	0	0	3
NDC1	0	0.5	0
NDUFA4	0	0	0.5
NDUFV1	0	0	8.5
NENF	0	0	1.5
NFXL1	0	1	0
NHLRC2	0	0.5	0
NIPSNAP3A	0	0	6
NIT2	0	0	1.5
NKX3-1	0	0	0.5
NME2	0	0	4.5
NOL3	0	0.5	0.5
NOMO3	0	2.5	12.5
NOP58	0	0	1
NSDHL	0	0.5	0
NSF	0	0.5	0
NTPCR	0	0.5	1.5
NUDCD2	0	0	2
NUP188	0	0.5	0
NUP205	0	0	1
NUP210	0	0.5	3.5
NUP93	0	0.5	0
OCIAD2	0	0	1
ODR4	0	0.5	0
OGDH	0	0	1.5
OS9	0	0.5	0
OSBPL8	0	2.5	0
OXCT1	0	0	3.5
P3H1	0	0	1
P4HA1	0	0	3.5
PAFAH1B1	0	0	0.5
PAFAH1B2	0	0.5	1
PAICS	0	1.5	0
PAIP2	0	0.5	0
PARK7	0	0	1
PARP16	0	0.5	0
PARP9	0	0.5	0
PAWR	0	0.5	0
PCK1	0	0.5	1
PCYOX1L	0	0	1
PDCL3	0	0	3
PDE4DIP	0	0	1.5
PDHA2	0	0	1
PDHB	0	0	7
PDHX	0	0	6
PDIA3	0	23.5	0
PDIA4	0	2.5	0
PDIA5	0	0	5
PELO	0	0.5	0
PELP1	0	0	0.5
PFDN1	0	0	2
PFKL	0	0.5	0
PGAM5	0	0	1
PGRMC1	0	1.5	0
PGRMC2	0	1.5	0
PHC2	0	0	0.5
PHF5A	0	0	1
PHPT1	0	0	1
PI15	0	0.5	0
PIAS3	0	0	0.5
PIGN	0	1	0
PIGO	0	1	0
PIGS	0	2.5	0
PIGT	0	1.5	0
PIGU	0	1	0
PIK3R2	0	0.5	0
PIR	0	0	1.5
PITX1	0	0	0.5
PIWIL3	0	0.5	0
PKMYT1	0	1	0
PLA2G6	0	0.5	0
PLGRKT	0	0	0.5
PLOD1	0	0	5
PLOD3	0	0	2
PLPP6	0	1	0
PLXNB2	0	0.5	0
PMM2	0	0	0.5
PMPCB	0	0	2
PNKP	0	0	1
PNPT1	0	0	6
POFUT1	0	0	1
POLDIP2	0	0	5
POLDIP3	0	0	4.5
POLR2B	0	0	1
POLR3C	0	0	0.5
POMGNT2	0	4	0
PON2	0	2.5	2
POR	0	4.5	0
POT1	0	0	0.5
PPIAL4G	0	0	1
PPIE	0	0	3
PPIF	0	0	2.5
PPIL2	0	0	1
PPIL3	0	0	0.5
PPP1CC	0	0	0.5
PPP1R12A	0	0.5	0
PPP2R2A	0	0	4
PPP4C	0	0	1
PRAF2	0	1.5	0
PRDX3	0	0.5	0
PREB	0	2	0
PREP	0	0	1
PRKAR1A	0	0	1
PRKCD	0	0.5	0
PRKCSH	0	0.5	0
PRKD1	0	0	1.5
PRKRA	0	0.5	0
PRMT6	0	0	0.5
PRPF3	0	0	3
PRPF40A	0	0	2
PRPF4B	0	0	2
PRRC2B	0	0	0.5
PSAT1	0	0	1.5
PSMA1	0	0	1.5
PSMA7	0	0.5	0
PSMA8	0	0	0.5
PSMC4	0	0.5	2
PSMD13	0	0	1
PSMD14	0	0	2
PSMD7	0	0	0.5
PSMD8	0	0.5	0
PSMD9	0	0	2
PTDSS1	0	0.5	0
PTGR2	0	0	1
PTPN1	0	3	0
PTRH2	0	5.5	2
PYCR1	0	0	7
PYCR2	0	0	1
PYGB	0	1.5	1
QKI	0	0	1
RAB10	0	1.5	0
RAB11B	0	0.5	0
RAB14	0	0.5	0
RAB1A	0	2	0
RAB1B	0	0.5	0
RAB21	0	0.5	0
RAB2A	0	1	0
RAB2B	0	1	0
RAB3GAP2	0	1	0
RAB5C	0	4	0
RAB7A	0	4	0
RANBP1	0	2	3
RANGAP1	0	0.5	0
RARS	0	0.5	3
RBM10	0	0	9.5
RBM12B	0	0	2.5
RBM15	0	0	1
RBM26	0	0	0.5
RBM27	0	0	1
RBM4B	0	0	0.5
RCC1L	0	0	0.5
RCN2	0	0.5	4.5
RCOR3	0	0	0.5
RDH11	0	8	0
RDH14	0	1	0
RDX	0	0	0.5
REEP6	0	1	0
RER1	0	0.5	0
RETSAT	0	2.5	0.5
RINT1	0	2	0
RMDN3	0	0.5	0
RNASEH2C	0	0	1
RNF145	0	1	0
RNF213	0	2	0
RNF214	0	0.5	0
RNF220	0	0	2
RNF41	0	1.5	0
RNMT	0	0	1
RNPEP	0	0	5.5
RPL22L1	0	0	1.5
RPL23	0	0	6.5
RPL26L1	0	1	0
RPL27	0	0	0.5
RPL32	0	0.5	0
RPL34	0	0.5	2
RPL36	0	0	1
RPL5	0	0	1.5
RPLP0	0	0	1.5
RPS10	0	0	3
RPS11	0	0.5	0
RPS15	0	0	1
RPS19	0	1.5	0
RPS21	0	0	2.5
RPS26P11	0	0.5	0
RPS3	0	0	0.5
RPS4Y1	0	1	0
RPS5	0	1	0
RRBP1	0	1.5	0
RTN4IP1	0	0	2.5
SACM1L	0	9.5	0
SAR1B	0	2	0.5
SARAF	0	1	0
SARS2	0	0	1.5
SBNO2	0	0	1
SCAMP3	0	0	1
SCAP	0	0.5	0
SCD	0	1	0
SCFD1	0	2	0
SCP2	0	0.5	0
SCYL1	0	1.5	0
SDF2L1	0	0	2
SDF4	0	0.5	0
SDSL	0	0	0.5
SEC11A	0	1	2
SEC13	0	0	2
SEC16A	0	1.5	8
SEC22B	0	8.5	0
SEC23A	0	2.5	2.5
SEC23B	0	0.5	0
SEC24A	0	0.5	0
SEC24C	0	0	3.5
SEC31A	0	0.5	1.5
SEC61A1	0	0	1
SEC63	0	6	0
SEL1L	0	2	0
SEL1L3	0	0.5	0
SELENBP1	0	0	15
SELENOI	0	0.5	0
SELENOT	0	1	0
SERPINB6	0	0.5	0
SFXN1	0	1	0
SGPL1	0	7.5	1
SHMT1	0	0	3
SHMT2	0	0.5	0
SIL1	0	0	0.5
SIRT5	0	0	0.5
SLC22A18	0	0.5	0
SLC25A1	0	0.5	0.5
SLC25A10	0	1	2
SLC27A1	0	0.5	0
SLC27A2	0	4	0
SLC33A1	0	0.5	0
SLC39A7	0	0.5	1
SLC4A10	0	0	0.5
SLC9A3R1	0	0	2
SLIRP	0	0	4
SMARCD3	0	0	3.5
SMNDC1	0	0	1
SMPD4	0	1.5	0
SMPDL3B	0	0	0.5
SNRPA	0	0	3.5
SNX9	0	0	12.5
SORD	0	0	12.5
SPCS2	0	2	0
SPCS3	0	0	1
SPEF2	0	0.5	0
SPTLC1	0	4	0
SPTLC2	0	1.5	0
SRC	0	1	0
SRD5A3	0	1.5	0
SREBF1	0	0.5	0
SREK1	0	0	1
SRP54	0	6	0
SRP68	0	3.5	0
SRP72	0	0	0.5
SRPRA	0	5	0
SRPRB	0	7	1
SRSF2	0	0	3
SRSF9	0	0	4.5
SSBP1	0	0	1
SSBP2	0	0	3.5
SSR1	0	2	0
SSR3	0	1.5	0
SSR4	0	3	1
SSU72	0	0	1
ST7	0	0.5	0
STAG2	0	0	5
STAT3	0	0	2
STATH	0	0	0.5
STAU1	0	0.5	0
STEAP2	0	2	0
STIM1	0	2	0
STRAP	0	1	0
STT3A	0	8.5	0
STT3B	0	5.5	0
STX17	0	1.5	0
STX18	0	0.5	0
SUCLG2	0	0	1
SUMF2	0	0	1
SUN2	0	0.5	0
SUPT6H	0	0	0.5
SUPT7L	0	0	0.5
SURF4	0	0	0.5
SYNE1	0	0	0.5
SYPL1	0	0	0.5
TAGLN2	0	0.5	0
TANK	0	0	1
TAP1	0	1	0
TAS1R1	0	0	0.5
TAX1BP1	0	0	1.5
TBC1D9B	0	1	0
TBCB	0	0.5	0
TBCD	0	1	0
TBK1	0	0	3
TBL1XR1	0	0	2
TBL2	0	10	0
TBRG4	0	0	1
TCF20	0	0	0.5
TCF25	0	1	0
TCIRG1	0	0	0.5
TECR	0	8	0
TEX264	0	1	0
TFAM	0	0	1
THEM6	0	3	0
THNSL1	0	0	1
THUMPD3	0	0.5	0
TIA1	0	0	1.5
TIAL1	0	0	1
TIMM13	0	0.5	0.5
TIMM44	0	0	9
TKFC	0	0	1
TLN1	0	0	5
TM7SF2	0	1.5	0
TMA7	0	0	0.5
TMBIM6	0	0.5	0
TMCO1	0	0.5	0
TMED10	0	1.5	0
TMED2	0	1	0
TMEM109	0	1	1
TMEM147	0	0.5	0
TMEM14C	0	0.5	0
TMEM161A	0	1.5	0
TMEM205	0	1	0
TMEM214	0	3.5	0
TMEM260	0	1	0
TMEM33	0	4	0.5
TMEM38B	0	2	0
TMPPE	0	0.5	0
TMTC3	0	1.5	1
TMX2	0	3	0
TMX3	0	0.5	0.5
TNKS1BP1	0	0	6.5
TNPO2	0	0.5	0
TOMM22	0	0	1.5
TOR1A	0	0.5	0
TOR1AIP1	0	1	0
TOR1B	0	0.5	0
TPR	0	0	7
TPT1	0	0	1
TRAF4	0	0.5	0
TRAP1	0	0	4
TRIM13	0	0.5	0
TRIM26	0	0.5	0
TRIM4	0	1.5	0
TRIP13	0	0.5	0
TRNT1	0	0	0.5
TRPM4	0	0.5	0
TRPS1	0	0	3
TSFM	0	0	2
TST	0	0	2.5
TTF2	0	0.5	0
TUBA4A	0	2	4
TUBAL3	0	0.5	1.5
TUBG1	0	1	0.5
TXNDC5	0	0	3.5
TYW1	0	0.5	0
U2SURP	0	0	6.5
UBAC2	0	1.5	0
UBE2E1	0	0	0.5
UBE2J1	0	1	0
UBE2K	0	0	0.5
UBE2O	0	0	3.5
UBE4A	0	4	0
UBR4	0	0	68.5
UBXN1	0	0	0.5
UBXN4	0	1	0
UBXN8	0	1	0
UFL1	0	0	0.5
UFM1	0	1	0
UFSP2	0	6	0
UGGT1	0	4.5	19
UGGT2	0	0	1.5
UGT2B11	0	0.5	0
UGT2B17	0	3	2.5
USE1	0	1	0
USP19	0	0.5	0
USP33	0	0.5	0
USP9X	0	1	0
VANGL1	0	0	4
VAPA	0	3	0
VAPB	0	2.5	0
VASP	0	0	0.5
VAV2	0	1.5	0
VCL	0	0.5	0
VGLL4	0	0	0.5
VPS13C	0	0.5	0
VPS29	0	0	1.5
VPS35	0	0.5	0
VRK1	0	0	0.5
VTA1	0	0.5	5
WAC	0	0	0.5
WDR1	0	1.5	0.5
WDR38	0	0	0.5
WDR61	0	0	3
WDR77	0	0	1.5
WFS1	0	5.5	0
WRNIP1	0	0	0.5
XPO7	0	0	1
XXYLT1	0	1	0
YKT6	0	1	0
YTHDF3	0	0	0.5
ZBTB9	0	0	2
ZC3H14	0	0	0.5
ZC3H18	0	0	0.5
ZC3H4	0	0	1
ZC3H7B	0	0.5	0
ZC3HAV1	0	4	0
ZCCHC8	0	0	0.5
ZFYVE1	0	1	0
ZMPSTE24	0	1.5	0
ZNF326	0	0	4
ZNF337	0	0	0.5
ZNF503	0	0.5	0
ZW10	0	0.5	0
ZWILCH	0	0.5	0

## Sheet: Table 4
GeneSymbol	LUC	CREB5	CREB5 L434P	CREB3
MCM7	0	17	11.5	0
NUMA1	0	15.5	16.5	0
NONO	0	15	12	0.5
GTF2I	0	14.5	15.5	0
CHD4	0	13.5	13.5	0
GMPS	0	11.5	11	1
SMARCC2	0	11.5	3.5	0
USP7	0	11.5	11	0
PRMT1	0	11	11	0
DDX5	0	10.5	9.5	0
RUVBL2	0	10.5	10.5	0.5
TLE3	0	10	4	0
DDX46	0	9.5	11.5	0
SMARCA4	0	9.5	3.5	0
SMC1A	0	9.5	5	0
U2AF2	0	9.5	12	1.5
CDK1	0	9	6	2.5
HCFC1	0	9	10.5	28
HNRNPL	0	9	13	0
MCM3	0	9	9	0
SRRM2	0	9	9.5	0
SUPT16H	0	9	9	0
TTLL12	0	9	7.5	3
ADNP	0	8.5	7	0
MCM2	0	8.5	10	0
XPOT	0	8.5	8.5	1.5
CCAR2	0	8	11.5	0
CREB5	0	8	7.5	0
POGZ	0	8	1	0
RPA1	0	8	8.5	0
RUVBL1	0	8	8.5	1
SMC3	0	8	5.5	0
SMCHD1	0	8	11.5	0
ZMYM4	0	8	3.5	0
GRHL2	0	7.5	2	0
MCM5	0	7.5	7.5	0
RBM25	0	7.5	6.5	0.5
TMPO	0	7.5	8	0
XPO5	0	7.5	6	0
HLTF	0	7	2.5	0
JUNB	0	7	0	0
KDM1A	0	7	4	0
MCM4	0	7	6	0
MCM6	0	7	7	0
NFIX	0	7	5	0
PUF60	0	7	8.5	0
SSB	0	7	6	0
FANCI	0	6.5	3.5	0
IRF2BPL	0	6.5	4	0
OGT	0	6.5	3.5	0.5
RTCB	0	6.5	10.5	1
SF3B2	0	6.5	7.5	0
SKIV2L2	0	6.5	6	0
SMARCA5	0	6.5	4.5	0
TOP2B	0	6.5	1.5	0
BUB3	0	6	6.5	0
DDX42	0	6	8.5	0
FEN1	0	6	4.5	0
MTA2	0	6	6.5	0
PDS5A	0	6	6.5	0
RBM39	0	6	7	0
SMARCA2	0	6	3.5	0
ACTL6A	0	5.5	3	0
AKR1A1	0	5.5	6	2
APEX1	0	5.5	7	1
ATF7	0	5.5	0	0
CBX3	0	5.5	5.5	0
CHD3	0	5.5	6	0
CSTF3	0	5.5	6	0
CTBP1	0	5.5	5	0
DDX23	0	5.5	9	0
ELAVL1	0	5.5	5.5	0
IRF2BP2	0	5.5	0	0
NSUN2	0	5.5	3	0
PDS5B	0	5.5	4	0
RBM4	0	5.5	5	0
RECQL	0	5.5	6	0
RNF20	0	5.5	7	0
SMU1	0	5.5	6	0
SRRT	0	5.5	5	0
TMPO	0	5.5	5	5.5
UBA1	0	5.5	8.5	1
ANP32E	0	5	4	0
DDB1	0	5	4.5	0
FKBP4	0	5	9.5	5
NELFB	0	5	3.5	0
PPP1R10	0	5	4.5	0
PRPF6	0	5	3	0
RTCA	0	5	3.5	0
SET	0	5	3.5	0
SMARCD2	0	5	2.5	0
TOP2A	0	5	5.5	0
XRN2	0	5	6	0
BCLAF1	0	4.5	7.5	0
CSTF2	0	4.5	3	0
CTBP2	0	4.5	2.5	0
HDAC2	0	4.5	4	0
HMGB1	0	4.5	3	0
HNRNPDL	0	4.5	4	0
IRF2BP1	0	4.5	1	0
JUND	0	4.5	0	0
OTUB1	0	4.5	7	1.5
PPM1G	0	4.5	4.5	0
RAN	0	4.5	6	3
RBM14	0	4.5	3	0
RCC1	0	4.5	3.5	0
SART3	0	4.5	7.5	0
SMARCE1	0	4.5	2	0
SNRNP70	0	4.5	3.5	0
SSRP1	0	4.5	4	0
ACLY	0	4	10.5	6
CDC5L	0	4	7.5	0
CHAMP1	0	4	2.5	0
DNAJA1	0	4	5.5	2.5
HDGF	0	4	4	0
HMGB3	0	4	4.5	0
INTS3	0	4	3	0
MTA1	0	4	4	0
NACC1	0	4	2.5	0
NCBP1	0	4	5	0
NFIA	0	4	2	0
NFIC	0	4	0	0
PBRM1	0	4	4.5	0
PSME3	0	4	4	0
RCC2	0	4	1.5	0
SMARCB1	0	4	1	0
SMARCC1	0	4	1	0
SNRNP40	0	4	2	0
SRSF6	0	4	4	0
TCEA1	0	4	5.5	0
THRAP3	0	4	6	0
ANP32A	0	3.5	3.5	0
AQR	0	3.5	1.5	0
ATXN10	0	3.5	4.5	3.5
C14orf166	0	3.5	3.5	0
CCAR1	0	3.5	1.5	0
DCAF7	0	3.5	0.5	0
DDX39B	0	3.5	3.5	0
DEK	0	3.5	3.5	0
DNAJC8	0	3.5	2	0
ESRRA	0	3.5	2.5	0
FAM98B	0	3.5	3	0
GNL3	0	3.5	4	0
HNRNPA1	0	3.5	2.5	0
INTS2	0	3.5	2	0
MBD3	0	3.5	2.5	0
POLR2A	0	3.5	3	0
PRDX5	0	3.5	5.5	3
PRPF19	0	3.5	6	0
RNF40	0	3.5	2.5	0
TARDBP	0	3.5	6.5	0
USP5	0	3.5	5	1.5
XAB2	0	3.5	1.5	0
ADAR	0	3	2	0
ATR	0	3	2.5	0
BLVRA	0	3	2.5	0.5
BRD2	0	3	0.5	0
BROX	0	3	4	3.5
CASZ1	0	3	1.5	0
CBX1	0	3	3	0
CBX5	0	3	4	0
CLIC1	0	3	3	0
CUL4A	0	3	5.5	0.5
DNAJC9	0	3	0.5	0
GATAD2B	0	3	2.5	0
GTF3C3	0	3	2.5	0
GTPBP4	0	3	2.5	0
HMBS	0	3	2.5	0.5
INTS1	0	3	4	0
KAT7	0	3	2.5	0
KDM3B	0	3	3.5	0
MAGOH	0	3	3	0
PHB2	0	3	3.5	4.5
PPP4R3A	0	3	2	0
RBM17	0	3	4	0
RFC2	0	3	4	0
RPRD1B	0	3	1	0
RXRA	0	3	2	0
SF3B4	0	3	3.5	0
SON	0	3	2.5	0
STIP1	0	3	5.5	3.5
TBX3	0	3	0	0
TXNRD1	0	3	2.5	0.5
UBR5	0	3	2.5	0
UBTF	0	3	1	0
USP39	0	3	2.5	0
ARID1A	0	2.5	0.5	0
ARID2	0	2.5	1	0
ATF2	0	2.5	0	0
BTAF1	0	2.5	4	0
CBR1	0	2.5	4	1.5
CRNKL1	0	2.5	1	0
CSNK2A1	0	2.5	1.5	0
DAZAP1	0	2.5	3	0
DDX21	0	2.5	2	0
DNAJA2	0	2.5	2.5	1
DNAJB1	0	2.5	2	0
EHMT2	0	2.5	0	0
EPM2AIP1	0	2.5	3.5	0
EXOSC2	0	2.5	1.5	0
FANCD2	0	2.5	1.5	0
HMGB1P1	0	2.5	2.5	0
HNRNPH3	0	2.5	4	0
HSPA1L	0	2.5	2.5	2
INTS9	0	2.5	2.5	0
IPO8	0	2.5	2.5	15.5
JUN	0	2.5	0	0
KDM5B	0	2.5	1.5	0
LMNB1	0	2.5	5.5	7.5
MGEA5	0	2.5	3.5	0.5
NIPBL	0	2.5	1	0
NR2F2	0	2.5	1	0
NT5DC1	0	2.5	1.5	0
NUP107	0	2.5	3.5	1
PAPSS1	0	2.5	3	0
PPIH	0	2.5	2	0
PPP2R1A	0	2.5	3	2.5
RAD50	0	2.5	1	0
RALY	0	2.5	4	0
RFC4	0	2.5	2.5	0
RFC5	0	2.5	0.5	0
RPA2	0	2.5	1.5	0
RPL9	0	2.5	1.5	3
SKI	0	2.5	0.5	0
SNRPB	0	2.5	3	0
SRP14	0	2.5	3.5	0
SUPT5H	0	2.5	2	0
TLE1	0	2.5	2.5	0
TNPO1	0	2.5	6.5	0.5
TRA2B	0	2.5	2	0
TRRAP	0	2.5	3	0
UBE2M	0	2.5	3	0.5
UGDH	0	2.5	1.5	0
ACP1	0	2	1.5	0
AR	0	2	1.5	0
ASH2L	0	2	0.5	0
ATRX	0	2	2.5	0
BAZ1A	0	2	1	0
CAPZA1	0	2	1.5	0.5
CDC73	0	2	4.5	0
CDK9	0	2	1.5	0
CIRBP	0	2	2	0.5
COPS4	0	2	2	0.5
CPSF2	0	2	2.5	0.5
DHX38	0	2	2.5	0
DHX40	0	2	2	0
DNMT1	0	2	0	0
ESD	0	2	3.5	0.5
FAM50A	0	2	1.5	0
FOXA1	0	2	1.5	0
GSR	0	2	2	0.5
GTF3C1	0	2	1	0
GTF3C4	0	2	1.5	0
HMGB2	0	2	2.5	0
HNRNPUL2	0	2	5.5	0
HOXB13	0	2	1.5	0
KIAA1429	0	2	2.5	0
LARP7	0	2	0	0
LDB1	0	2	0	0
LSM7	0	2	1	0
MED1	0	2	0	0
NANS	0	2	4.5	0
NAT10	0	2	2.5	0
NCAPD3	0	2	0.5	0
NCAPG2	0	2	1	0
NCOR2	0	2	0.5	0
NELFCD	0	2	1.5	0
NOP56	0	2	4.5	0
NOSIP	0	2	1.5	0
PABPN1	0	2	1	0
PAF1	0	2	3.5	0
PDCD5	0	2	0.5	0
PIN1	0	2	2.5	0.5
PLAA	0	2	2	0
POLD1	0	2	0	0
PPA1	0	2	2.5	0
PRIM2	0	2	1.5	0
PRPF4	0	2	1.5	0
QRICH1	0	2	0.5	0
RAD21	0	2	1	0
RBBP7	0	2	3	0
RBM12	0	2	3.5	0
RBM3	0	2	1.5	0
RCOR1	0	2	2.5	0
RPL11	0	2	1.5	2
SNRPD2	0	2	2	0
SNRPE	0	2	1.5	0
SRSF5	0	2	2	0
SRSF8	0	2	3	0
TBL3	0	2	1	0
TIPRL	0	2	1.5	0
TRMT1L	0	2	1.5	0
TXNL1	0	2	1.5	0
WBP11	0	2	2.5	0
WIZ	0	2	1.5	0
YARS	0	2	1.5	1.5
YLPM1	0	2	1.5	0
ZNF24	0	2	2	0
ACIN1	0	1.5	0.5	0
ADSL	0	1.5	3	1.5
AES	0	1.5	0	0
ANAPC1	0	1.5	1.5	0
BANF1	0	1.5	1	0.5
BAZ1B	0	1.5	3.5	0
BCAS2	0	1.5	1.5	0
BOP1	0	1.5	1.5	0.5
C7orf26	0	1.5	1	0
CDK13	0	1.5	0.5	0
CHD5	0	1.5	1.5	0
CHD8	0	1.5	4	0
COASY	0	1.5	2	1
CPSF1	0	1.5	1.5	0
CPSF7	0	1.5	1.5	0
CREBBP	0	1.5	1	0
CSRP1	0	1.5	1.5	1
CUL1	0	1.5	2	0.5
DHX16	0	1.5	0	0
DHX8	0	1.5	0.5	0
EIF5A	0	1.5	2	4
ELAC2	0	1.5	0.5	0
EP400	0	1.5	1	0
EXOSC10	0	1.5	1	0
EYA3	0	1.5	0.5	0
FIGNL1	0	1.5	0.5	0
FLAD1	0	1.5	0	0
GID8	0	1.5	1	0
GLRX3	0	1.5	2.5	0.5
GMEB2	0	1.5	1.5	0
GSE1	0	1.5	0	0
GTF2B	0	1.5	2	0
GTF2E2	0	1.5	0.5	0
GTF3C5	0	1.5	1	0
HEATR1	0	1.5	1	0
HMG20B	0	1.5	0	0
HNF1B	0	1.5	0.5	0
HSPA1B	0	1.5	1	1
INTS14	0	1.5	0.5	0
INTS4	0	1.5	0.5	0
IPO5	0	1.5	4.5	2.5
KDM6A	0	1.5	0.5	0
KIF4A	0	1.5	0	0
LIG3	0	1.5	0.5	0
LRRC41	0	1.5	1	0
MAPK14	0	1.5	2	0.5
MED23	0	1.5	2	0
MMS19	0	1.5	1.5	1
MRE11	0	1.5	0.5	0
NAMPT	0	1.5	5.5	0
NAP1L1	0	1.5	2.5	6
NASP	0	1.5	2	0
NELFE	0	1.5	2	0
NOL6	0	1.5	1	0
NXF1	0	1.5	1.5	0
ORC3	0	1.5	1.5	0
PAPOLA	0	1.5	1	0
PCNA	0	1.5	1.5	0
PDCD4	0	1.5	2	0
PDCD6	0	1.5	0.5	0
PFDN2	0	1.5	1.5	0.5
PFDN5	0	1.5	1	0
PIAS4	0	1.5	1	0
PMVK	0	1.5	1	0.5
PNN	0	1.5	1.5	0
POLR1C	0	1.5	2	0
PPME1	0	1.5	0.5	0
PRPF31	0	1.5	1	0
PSPC1	0	1.5	1.5	0
RAI1	0	1.5	0.5	0
RB1	0	1.5	0.5	0
RFC1	0	1.5	0	0
RIOX2	0	1.5	0.5	0
RREB1	0	1.5	0	0
RSF1	0	1.5	1.5	0
RTF1	0	1.5	0.5	0
SAMHD1	0	1.5	1	0
SARNP	0	1.5	2.5	0
SART1	0	1.5	1.5	0
SF3B6	0	1.5	2	0
SKP1	0	1.5	3.5	1.5
SLFN5	0	1.5	1	0
SNRPB2	0	1.5	2	0
SNRPF	0	1.5	2.5	0
SNW1	0	1.5	3	0
SRRM1	0	1.5	2.5	0
SRSF11	0	1.5	2.5	0
TFAP4	0	1.5	0	0
TRA2A	0	1.5	1	0
TRIM33	0	1.5	0.5	0
TROVE2	0	1.5	0.5	0
TSEN34	0	1.5	1	0
TXNDC17	0	1.5	2	0
UBE2L3	0	1.5	1	0
UROD	0	1.5	1.5	0.5
USP34	0	1.5	4	0
VDAC2	0	1.5	0.5	4
WDR12	0	1.5	0.5	0
WDR5	0	1.5	0.5	0
XPO6	0	1.5	1	0
ZMYND8	0	1.5	0	0
ZNF703	0	1.5	0	0
ZRANB2	0	1.5	1.5	0
AKAP8	0	1	1.5	0
ANP32B	0	1	1.5	0
ANXA7	0	1	2.5	0
AP1B1	0	1	1.5	1.5
APOBEC3A	0	1	0.5	0
APTX	0	1	0.5	0
ARID1B	0	1	0	0
ARID5B	0	1	0	0
ATAD2	0	1	1	0
ATP5C1	0	1	0.5	1
BAG5	0	1	0.5	1
BEND3	0	1	1.5	0
BLVRB	0	1	1	1.5
BPNT1	0	1	3	0
BRAT1	0	1	0.5	0
BRD3	0	1	2.5	0
BRD4	0	1	0.5	0
C7orf50	0	1	2	0
CAP1	0	1	0.5	1.5
CCDC106	0	1	0	0
CDC37	0	1	1	1
CDK2AP1	0	1	1	0
CENPF	0	1	0	0
CHAF1B	0	1	0	0
CHERP	0	1	2.5	0
COPA	0	1	2.5	9
COPS2	0	1	2.5	0
COPS7B	0	1	1	0
CRADD	0	1	1	0.5
DCUN1D5	0	1	1.5	0
DCXR	0	1	0.5	2
DNAJC17	0	1	0.5	0
DRAP1	0	1	1	0
EDF1	0	1	0.5	0.5
EEF1G	0	1	3	1
EIF6	0	1	2.5	0
ELOA	0	1	0.5	0
EMG1	0	1	0	0
ERH	0	1	1.5	0
ETV6	0	1	0.5	0
FBRS	0	1	0	0
FDPS	0	1	0	0
FIP1L1	0	1	0	0
FOXO3	0	1	0	0
FTO	0	1	2	0
GAMT	0	1	1	0
GARS	0	1	1.5	1
GRB2	0	1	0	0
GSG2	0	1	0	0
GTF2F1	0	1	0.5	0
HNRNPC	0	1	0.5	0
HSPA9	0	1	0.5	0
HTATSF1	0	1	1	0
IDH1	0	1	2.5	0.5
INTS13	0	1	0	0
INTS6	0	1	1.5	0
IPO11	0	1	1	0
IPO7	0	1	3.5	11.5
IPO9	0	1	1	0.5
ISOC1	0	1	1	0.5
ISY1	0	1	1	0
JMJD1C	0	1	0.5	0
KIF2C	0	1	0.5	0
KPNA2	0	1	1.5	1.5
KPNA4	0	1	1	1
LIN9	0	1	1	0
LMNA	0	1	6.5	4.5
LSM4	0	1	1.5	0
MAGEA4	0	1	0.5	0
MASTL	0	1	0	0
MCM4	0	1	1	0
MED14	0	1	1	0
MORC2	0	1	1	0
MORF4L1	0	1	1	0
MORF4L2	0	1	0	0
MTAP	0	1	2	0
MYBBP1A	0	1	1	0
NCAPD2	0	1	1	0
NCOA1	0	1	0.5	0
NCOR1	0	1	0	0
NELFA	0	1	1.5	0
NLE1	0	1	1.5	0
NOC4L	0	1	0	0
NOLC1	0	1	1	0
NOP9	0	1	1	0
NVL	0	1	2	0
OGFOD1	0	1	0	0
PAXIP1	0	1	0	0
PBX2	0	1	0	0
PCBD1	0	1	1	0.5
PCF11	0	1	1	0
PCGF6	0	1	0	0
PCIF1	0	1	1	0
PCNP	0	1	1.5	0
PCYT1A	0	1	0.5	0
PDE12	0	1	1	0.5
PES1	0	1	0	0
PFN2	0	1	0.5	0
PGPEP1	0	1	1	0.5
PIN4	0	1	1	0
PMS2	0	1	1	0
POLE	0	1	0	0
PPID	0	1	0.5	0.5
PPIL4	0	1	1	0
PPP1R8	0	1	0	0
PRCC	0	1	1	0
PRKAG1	0	1	1	1
PSMD10	0	1	1.5	0
PTBP2	0	1	0	0
PUS7	0	1	0	0
PWP2	0	1	1	0
RAD54L2	0	1	0	0
RASA1	0	1	0.5	0.5
RBBP5	0	1	0	0
RBM7	0	1	0.5	0
RIF1	0	1	0.5	0
RNH1	0	1	2.5	1
RPL17	0	1	2	0.5
RPL3	0	1	2.5	2
RPLP0P6	0	1	0.5	2.5
RPLP2	0	1	0.5	1
RPN1	0	1	2.5	18
RPP40	0	1	1	0
RPRD2	0	1	0	0
RPS10P5	0	1	0	0.5
RPS15A	0	1	2	1.5
RPS27	0	1	0.5	1
RPS28	0	1	1.5	1.5
RPS6	0	1	0.5	1
RPSA	0	1	2.5	2.5
RSU1	0	1	0	0
SAP18	0	1	1.5	0
SBNO1	0	1	2.5	0
SCCPDH	0	1	0	0.5
SDCBP	0	1	0.5	0
SELENOH	0	1	1	0
SETD1A	0	1	0	0
SF3A2	0	1	2	0
SIN3A	0	1	1	0
SMAP	0	1	1	0
SMARCD1	0	1	0	0
SMC2	0	1	0	0
SMC4	0	1	1	0
SNRPC	0	1	1	0
SNRPD3	0	1	2.5	1
SNRPGP15	0	1	2	0
SRBD1	0	1	0	0
SRI	0	1	0	0
SRSF12	0	1	1	0
SRSF3	0	1	0.5	0
ST13	0	1	2	0.5
STAG1	0	1	0.5	0
TAF2	0	1	1	0
TCERG1	0	1	1	0
THOC1	0	1	0.5	0
THOC2	0	1	2.5	0
THOC5	0	1	0	0
THOC6	0	1	1.5	0
TIGAR	0	1	1	0
TRIM24	0	1	1.5	0
TRMT1	0	1	2.5	0
TRMT112	0	1	0	0
TSNAX	0	1	1	0
UBE2T	0	1	0	0
UBE3C	0	1	0.5	0.5
USP14	0	1	2	0.5
USP48	0	1	0.5	0
UTP20	0	1	0.5	0
UVSSA	0	1	1	0
VBP1	0	1	1.5	1
VDAC3	0	1	0.5	1
WDHD1	0	1	0.5	0
WDR70	0	1	0.5	0
WDR82	0	1	1	0
YWHAG	0	1	2	1
YY1	0	1	0.5	0
ZBTB21	0	1	0.5	0
ZNF207	0	1	0	0
ZNF217	0	1	0	0
ZNF592	0	1	0	0
ZNF687	0	1	0	0
	0	1	1	0.5
	0	1	1	0
	0	1	0.5	0
	0	1	0	0
ABCD3	0	0.5	0.5	1.5
AFF4	0	0.5	0	0
AHNAK	0	0.5	0	0
AIP	0	0.5	0.5	0.5
ALKBH5	0	0.5	0	0
ANXA11	0	0.5	2.5	0
AP2B1	0	0.5	0.5	1
AP3D1	0	0.5	0	0
APOBEC3B	0	0.5	0	0
APRT	0	0.5	0.5	0.5
ARL6IP4	0	0.5	0.5	0
ATIC	0	0.5	3	2
ATN1	0	0.5	1.5	0
ATP1A1	0	0.5	2.5	1.5
ATP2A1	0	0.5	0	11.5
ATP6V1F	0	0.5	0.5	1
BAP1	0	0.5	0	0
BCCIP	0	0.5	0	0
BCL6	0	0.5	0	0
BCL7C	0	0.5	0	0
BCOR	0	0.5	0	0
BID	0	0.5	0.5	0.5
BOLA2	0	0.5	1.5	0
C5orf51	0	0.5	0.5	0
CACYBP	0	0.5	0.5	0
CCDC47	0	0.5	0.5	8
CCNH	0	0.5	0.5	0
CDC45	0	0.5	0	0
CDK11A	0	0.5	1	0
CDK5	0	0.5	1	0
CEBPG	0	0.5	0	0
CELF1	0	0.5	0	0
CENPX	0	0.5	0	0
CETN2	0	0.5	0	0
CFAP20	0	0.5	0	0
CFDP1	0	0.5	1.5	0
CGGBP1	0	0.5	0.5	0
CHD1	0	0.5	0.5	0
CHRAC1	0	0.5	0	0
CHTOP	0	0.5	0.5	0
CIAPIN1	0	0.5	0.5	0
CIITA	0	0.5	0	0
CKMT1A	0	0.5	0	0.5
CLASP1	0	0.5	0	0
CLHC1	0	0.5	0	0
CLK3	0	0.5	0.5	0
CLNS1A	0	0.5	0	0
COIL	0	0.5	1.5	0
COMT	0	0.5	1	0.5
COPB2	0	0.5	0	1.5
COPE	0	0.5	1	1.5
COPS5	0	0.5	0	0
COPS7A	0	0.5	0.5	0
COPS8	0	0.5	0	0
CRCP	0	0.5	0	0
CRKL	0	0.5	0	0
CSTB	0	0.5	1	0
CSTF2T	0	0.5	0	0
CTNNBL1	0	0.5	3	0
CTR9	0	0.5	0.5	0
CUL3	0	0.5	0.5	0
CUL4B	0	0.5	1.5	0
CUTA	0	0.5	0	0
CUX1	0	0.5	0.5	0
CUX1	0	0.5	0	0
CWC22	0	0.5	0	0
CXorf56	0	0.5	0	0
DDI2	0	0.5	0	0
DDX18	0	0.5	0.5	0
DDX24	0	0.5	0.5	0
DKFZp686A11192	0	0.5	0	0
DNAJC7	0	0.5	0	0
DNTTIP1	0	0.5	0	0
DPF2	0	0.5	0	0
DPH1	0	0.5	0	0
DPH2	0	0.5	0	0
DPM1	0	0.5	1	2.5
DSCC1	0	0.5	0.5	0
DUS1L	0	0.5	1	0
DUS3L	0	0.5	0.5	0
DUSP3	0	0.5	0.5	0
DYNLL1	0	0.5	1	0
EEF1B2	0	0.5	1.5	2
EEF1D	0	0.5	1.5	0
EIF1	0	0.5	0.5	0.5
EIF3F	0	0.5	0.5	0.5
EIF5	0	0.5	1	2
env	0	0.5	0	0
EPRS	0	0.5	0.5	1.5
ERCC1	0	0.5	0.5	0
ERCC4	0	0.5	1	0
ESRP1	0	0.5	0.5	0
ESRP2	0	0.5	0.5	0
ESYT1	0	0.5	0.5	4.5
EZR	0	0.5	1	1
FADD	0	0.5	0.5	0
FBXO7	0	0.5	1	0
FKBP5	0	0.5	2	0
FOXJ3	0	0.5	0	0
FOXP1	0	0.5	1	0
GCDH	0	0.5	0	0
GFPT1	0	0.5	1	0.5
GNB2	0	0.5	0	1.5
GNL3L	0	0.5	0	0
GOLPH3	0	0.5	0	1
GOLPH3L	0	0.5	0.5	0.5
GPS1	0	0.5	0.5	0
GPX4	0	0.5	1	0
GRHPR	0	0.5	1.5	0.5
GTF2E1	0	0.5	0	0
GTF2H1	0	0.5	0.5	0
GTF2H2C	0	0.5	1	0
GTF2H3	0	0.5	0	0
H1FX	0	0.5	0	0
HACD3	0	0.5	0	5.5
hCG_21098	0	0.5	0	0
HDAC1	0	0.5	0.5	0
HDGFL2	0	0.5	1	0
HEATR3	0	0.5	2	0
HELLS	0	0.5	0	0
HGD	0	0.5	0	0
HLA-B	0	0.5	0	0
HLA-C	0	0.5	0	0
HMCES	0	0.5	0	0
HNRNPLL	0	0.5	2	0
HOXC13	0	0.5	0	0
IDH3G	0	0.5	0	0
IGLC2	0	0.5	0.5	0.5
IK	0	0.5	0	0
IMPDH2	0	0.5	0	0.5
JDP2	0	0.5	0	0
KAT2A	0	0.5	0	0
KBTBD3	0	0.5	0	0
KBTBD7	0	0.5	1	0
KIF18B	0	0.5	0	0
KMT2D	0	0.5	0	0
KRI1	0	0.5	0.5	0
LAGE3	0	0.5	1	0
LAS1L	0	0.5	0.5	0
LCMT1	0	0.5	0	0
LEO1	0	0.5	1	0
LRRTM2	0	0.5	0	0.5
LYAR	0	0.5	0.5	0
MAGEA3	0	0.5	0	0
MAT2A	0	0.5	0	0
MCRS1	0	0.5	0	0
ME1	0	0.5	0.5	0
MED11	0	0.5	0	0
MED21	0	0.5	0	0
MED30	0	0.5	0	0
METTL1	0	0.5	0	0
METTL3	0	0.5	0	0
MKLN1	0	0.5	0	0
MRFAP1	0	0.5	0	0
MSANTD2	0	0.5	0.5	0
MSRB3	0	0.5	0	0
MYH9	0	0.5	9	4
MYO6	0	0.5	1	1
NACC2	0	0.5	0.5	0
NARS	0	0.5	4	5.5
NFIB	0	0.5	0	0
NMRAL1	0	0.5	0.5	0
NPLOC4	0	0.5	0.5	0
NQO1	0	0.5	0	0
NSMCE4A	0	0.5	0	0
NUP50	0	0.5	1	0
NXN	0	0.5	0	0
ORC4	0	0.5	1	0
OSTF1	0	0.5	1	0
PAFAH1B3	0	0.5	0.5	0.5
PBK	0	0.5	0	0
PBX1	0	0.5	0	0
PCMT1	0	0.5	2	1
PCYT2	0	0.5	0	0
PDXK	0	0.5	1.5	2
PEF1	0	0.5	0.5	0
PGAM1	0	0.5	1	0.5
PHAX	0	0.5	1	0
PHF2	0	0.5	0	0
PHF21A	0	0.5	0	0
PIAS1	0	0.5	0.5	0
PIAS2	0	0.5	0.5	0
PMS1	0	0.5	0	0
PNP	0	0.5	0	0
POLA1	0	0.5	0.5	0
POLA2	0	0.5	0	0
POLR2C	0	0.5	0.5	0
POLR2G	0	0.5	0.5	0
POLR2I	0	0.5	0	0
POLR3A	0	0.5	0.5	0
PPIG	0	0.5	0.5	0
PPP1R7	0	0.5	1.5	0
PPP2CA	0	0.5	0.5	0
PPP2R5E	0	0.5	0	0
PPP4R3B	0	0.5	1.5	0
PPWD1	0	0.5	0.5	0
PQBP1	0	0.5	0	0
PRB1	0	0.5	0	0
PRMT5	0	0.5	1.5	0
PRPF38A	0	0.5	1.5	0
PRPF38B	0	0.5	0.5	0
PRR12	0	0.5	0	0
PSIP1	0	0.5	0	0
PSKH1	0	0.5	0.5	0.5
PSMA4	0	0.5	1	0
PSMD12	0	0.5	0.5	0.5
PSMD4	0	0.5	0	0
PTPA	0	0.5	1	0.5
PUDP	0	0.5	0.5	0
RAD23A	0	0.5	0	0
RAD23B	0	0.5	0.5	0.5
RBM28	0	0.5	0	0
RBM5	0	0.5	2	0
REPIN1	0	0.5	1	0
RFC3	0	0.5	0.5	0
RGS10	0	0.5	1	0
RHOC	0	0.5	1	0.5
RING1	0	0.5	0.5	0
RPL10	0	0.5	0.5	1.5
RPL28	0	0.5	0	0
RPL37A	0	0.5	0	0.5
RPL38	0	0.5	0	1.5
RPP30	0	0.5	0.5	0
RPRD1A	0	0.5	1.5	0
RPS17	0	0.5	1	1.5
RRN3P2	0	0.5	0	0
RSL1D1	0	0.5	0.5	0
RTFDC1	0	0.5	1	0
S100A11	0	0.5	0	0
SAAL1	0	0.5	1.5	0
SAE1	0	0.5	1	0
SAP30BP	0	0.5	0.5	0
SAR1A	0	0.5	0	4
SCAI	0	0.5	0.5	0
SDAD1	0	0.5	1	0
SENP3	0	0.5	1.5	0
SERBP1	0	0.5	0.5	0.5
SET	0	0.5	0	0
SH3GL3	0	0.5	0.5	0
SH3GLB2	0	0.5	0.5	0
SHOC2	0	0.5	0.5	0
SIN3B	0	0.5	1	0
SIRT1	0	0.5	0.5	0
SMAD4	0	0.5	0	0
SMC6	0	0.5	0	0
SMS	0	0.5	0	0
SND1	0	0.5	4	18
SNU13	0	0.5	0.5	0
SON	0	0.5	1	0
SPR	0	0.5	1	0
SRM	0	0.5	0	0
SRR	0	0.5	1	0
SRSF10	0	0.5	2	0
SSBP3	0	0.5	0	0
STAP2	0	0.5	1.5	0
STMN1	0	0.5	0	0
STXBP2	0	0.5	0.5	0
SUGP2	0	0.5	4	0
SUPT3H	0	0.5	0	0
TAF10	0	0.5	0	0
TAF15	0	0.5	1	0
TAF5L	0	0.5	0	0
TAF8	0	0.5	0.5	0
TARS	0	0.5	0.5	0
TBCEL	0	0.5	0.5	0
TDP1	0	0.5	0.5	0
TERF2IP	0	0.5	0	0
TFRC	0	0.5	0	1
THUMPD1	0	0.5	0	0
TK1	0	0.5	0	0
TOE1	0	0.5	0	0
TOP1MT	0	0.5	0	0
TOX4	0	0.5	0	0
TRAPPC3	0	0.5	0	0
TRIM25	0	0.5	1	0.5
TRIP12	0	0.5	0	0
TRMT5	0	0.5	0.5	0
TTC23L	0	0.5	0	0
TUFM	0	0.5	0.5	0.5
TUT1	0	0.5	0	0
TWF1	0	0.5	0.5	0
U2AF1L5	0	0.5	1	0
UBA2	0	0.5	1.5	0
UBE2C	0	0.5	0.5	0
UBE2D2	0	0.5	1	0
UBE2N	0	0.5	0	0
UBE2S	0	0.5	0	0
UCK2	0	0.5	0	0
UGT2B15	0	0.5	0.5	11
ULK3	0	0.5	0	0
USP11	0	0.5	0.5	0
UTP18	0	0.5	0.5	0
WDR3	0	0.5	0	0
WDR36	0	0.5	1	0
WDR5B	0	0.5	0	0
WRN	0	0.5	1	0
WTAP	0	0.5	1	0
YEATS4	0	0.5	0	0
YWHAB	0	0.5	2.5	0
YY2	0	0.5	0	0
ZBTB40	0	0.5	0	0
ZC3H13	0	0.5	1	0
ZC3HC1	0	0.5	1	0
ZFHX3	0	0.5	0	0
ZFP91	0	0.5	0	0
ZFR	0	0.5	2	0.5
ZIC2	0	0.5	0	0
ZKSCAN1	0	0.5	0.5	0
ZMYM3	0	0.5	0	0
ZNF141	0	0.5	1	0
ZNF316	0	0.5	0	0
ZNF638	0	0.5	0.5	0
ZNF773	0	0.5	0	0
43525	0	0	0	0.5
43530	0	0	0	0.5
43710	0	0	0.5	0
AAAS	0	0	0	1.5
AARSD1	0	0	0.5	0
AASDH	0	0	0.5	0
AASDHPPT	0	0	1	0
ABCE1	0	0	0.5	0.5
ABHD14B	0	0	2	0
ABHD2	0	0	0	0.5
ABHD6	0	0	0	0.5
ACACA	0	0	0.5	0.5
ACAD9	0	0	0	0.5
ACADVL	0	0	0	0.5
ACBD3	0	0	0	0.5
ACSL1	0	0	0	2.5
ACSL3	0	0	0	9.5
ACSL5	0	0	0	0.5
ACTR8	0	0	0.5	0
ADAMTSL1	0	0	0.5	0
ADK	0	0	0.5	0
ADSSL1	0	0	0.5	0
AGAP2	0	0	0.5	0
AGL	0	0	0	0.5
AGPAT2	0	0	0	0.5
AIDA	0	0	1	0
AIFM1	0	0	0	0.5
AIMP2	0	0	0.5	0.5
AKAP1	0	0	0.5	0
ALDH18A1	0	0	0	0.5
ALDH3A2	0	0	0.5	4.5
ALDOC	0	0	0	2
ALG1	0	0	0	3.5
ALG11	0	0	0	1
ALG8	0	0	0	1
ALG9	0	0	0	0.5
AMFR	0	0	0	0.5
ANAPC7	0	0	0.5	0
ANK3	0	0	3	1.5
ANKFY1	0	0	0	0.5
ANXA4	0	0	2.5	0
ANXA6	0	0	4.5	0.5
ANXA6	0	0	0.5	0
AP1G1	0	0	0	0.5
AP1G2	0	0	0.5	0
AP2A1	0	0	1	0
APMAP	0	0	0	2
APOL2	0	0	0	0.5
ARAF	0	0	0	0.5
ARF4	0	0	1.5	4.5
ARHGAP1	0	0	0	1.5
ARIH1	0	0	0.5	0
ARIH2	0	0	0.5	0
ARL2	0	0	0	0.5
ARL6IP1	0	0	0	0.5
ARL6IP5	0	0	0	4.5
ARMC5	0	0	0.5	0
ASH1L	0	0	0.5	0
ASPH	0	0	0	2.5
ASS1	0	0	0.5	0.5
ATAD1	0	0	0	0.5
ATAD2B	0	0	0.5	0
ATL2	0	0	0	0.5
ATL3	0	0	0	3
ATP13A1	0	0	0	10.5
ATP5J2	0	0	0.5	1.5
ATP6V1A	0	0	0.5	0
ATP6V1B2	0	0	0	0.5
ATP6V1C1	0	0	0.5	0.5
ATP6V1H	0	0	0	0.5
AZGP1	0	0	0.5	0
BABAM2	0	0	0.5	0
BAHCC1	0	0	0.5	0
BCAP31	0	0	0	0.5
BET1	0	0	0	0.5
BMS1	0	0	0.5	0
BNIP1	0	0	0	1
BRD7	0	0	1	0
BRI3BP	0	0	0	2
BSCL2	0	0	0	0.5
BZW1	0	0	1.5	1.5
BZW2	0	0	0	0.5
C11orf98	0	0	0.5	0
C12orf57	0	0	0.5	0
C16orf58	0	0	0	1
C16orf62	0	0	1	0
C17orf75	0	0	0.5	0
C21orf33	0	0	0.5	0
C9orf142	0	0	0.5	0
C9orf85	0	0	0	0.5
CALM2	0	0	0	0.5
CALR	0	0	0	18
CALR	0	0	0	0.5
CAMLG	0	0	0	1
CANX	0	0	0	8.5
CARHSP1	0	0	0.5	0
CARS2	0	0	0	0.5
CAT	0	0	0	1
CBX8	0	0	0.5	0
CC2D1A	0	0	0	1.5
CCDC137	0	0	0	0.5
CCDC170	0	0	0	0.5
CCNK	0	0	1	0
CCT6B	0	0	1	0
CD2BP2	0	0	0.5	0
CDK12	0	0	0.5	0
CDK8	0	0	1	0
CERS4	0	0	0	1
CHD7	0	0	0.5	0
CHID1	0	0	0	0.5
CHMP4B	0	0	0.5	0
CHMP5	0	0	1	0
CHMP7	0	0	0	2
CIB1	0	0	0	0.5
CIC	0	0	0.5	0
CISD2	0	0	0	0.5
CIT	0	0	0	0.5
CKAP4	0	0	0.5	0.5
CLCC1	0	0	0	0.5
CMTR2	0	0	0.5	0
CNOT1	0	0	0.5	0
CNOT11	0	0	0.5	0.5
CNPY2	0	0	0	0.5
CNPY3	0	0	0	0.5
COG4	0	0	0.5	0
COL9A3	0	0	1.5	0
COMMD2	0	0	0.5	0.5
COPG1	0	0	1	1.5
COPG2	0	0	0	0.5
COPS3	0	0	1	0
COPS6	0	0	0.5	0
COX7A2	0	0	0	0.5
CPT1A	0	0	0	4
CREB3	0	0	0	23
CREB3L4	0	0	0	8.5
CRIP2	0	0	0.5	0
CRK	0	0	0.5	0
CRYL1	0	0	1	0
CSDE1	0	0	0	1.5
CSNK2B	0	0	0.5	0
CTNNB1	0	0	1	0
CTNND1	0	0	1	0
CTTN	0	0	0	0.5
CUL5	0	0	1.5	0
CWF19L2	0	0	1	0
CYB5A	0	0	0	0.5
CYB5R3	0	0	0	2
CYFIP1	0	0	0.5	0.5
CYP27B1	0	0	1	0
CYP4F2	0	0	0	0.5
CYP51A1	0	0	0	4.5
DAD1	0	0	0	1.5
DCAKD	0	0	0	3
DDOST	0	0	0	10
DDRGK1	0	0	0	6.5
DDX54	0	0	0.5	0
DDX6	0	0	1	1
DHCR24	0	0	0	6.5
DHCR7	0	0	0	5
DHRS13	0	0	0	2
DHRS7	0	0	0	5.5
DHRS7B	0	0	0	4.5
DHX29	0	0	0.5	1
DHX35	0	0	0.5	0
DIS3	0	0	0.5	0
DLD	0	0	0	0.5
DNAJB12	0	0	0	5.5
DNAJC1	0	0	0	3
DNAJC16	0	0	0	2.5
DNAJC25	0	0	0	1.5
DNM2	0	0	1	0
DNPEP	0	0	0	0.5
DOCK6	0	0	0	0.5
DOCK7	0	0	0.5	1.5
DOHH	0	0	0.5	0
DOLK	0	0	0	2
DOLPP1	0	0	0	2
DOPEY2	0	0	0	1
DPH5	0	0	0.5	0
DRG2	0	0	0	0.5
DTYMK	0	0	0.5	0
DYNC1H1	0	0	0	1
ECHS1	0	0	0	0.5
EIF1AX	0	0	0.5	0
EIF2S1	0	0	0	0.5
EIF2S3L	0	0	0	0.5
EIF3B	0	0	1	0
EIF3E	0	0	1	0.5
EIF3K	0	0	1.5	0
EIF3L	0	0	0.5	0
EIF3M	0	0	0.5	0.5
EIF4B	0	0	0.5	0.5
EIF4G1	0	0	0.5	2
EIF4G2	0	0	0	0.5
ELMOD2	0	0	0	1
ELOC	0	0	0.5	0
EMC1	0	0	0	6.5
EMC2	0	0	0	2.5
EMC9	0	0	0	1
EMD	0	0	0	7
ENGASE	0	0	0.5	0
ENOPH1	0	0	0.5	0
EPHX1	0	0	0	6
EPS8L2	0	0	0	0.5
ERGIC1	0	0	0	1
ERLIN1	0	0	0	0.5
ERLIN2	0	0	0	2
ERP29	0	0	0	4
ERP44	0	0	0	1
ETF1	0	0	0	2.5
ETFB	0	0	0	2
EXOSC9	0	0	0.5	0
FAAH	0	0	0	8
FADS2	0	0	0	6
FAF2	0	0	0.5	6
FAM129B	0	0	0.5	0
FAM8A1	0	0	0	0.5
FAM98A	0	0	0.5	0
FARSA	0	0	0	0.5
FDFT1	0	0	0	2
FEM1B	0	0	0.5	0
FEV	0	0	0	0.5
FH	0	0	0	1
FIS1	0	0	0	0.5
FITM2	0	0	0	1
FKBP11	0	0	0	0.5
FKBP2	0	0	0	1.5
FKBP3	0	0	0	1
FKBP8	0	0	0.5	4.5
FLNA	0	0	1	0
FLNB	0	0	2	1.5
FLYWCH2	0	0	0.5	0
FNDC3B	0	0	0	1
FNTA	0	0	0.5	0
FOLH1	0	0	0	0.5
FOLH1B	0	0	0	1.5
FTSJ3	0	0	0.5	0
FXR1	0	0	1	1
G3BP2	0	0	0.5	0
GAK	0	0	1	1
GALK2	0	0	0.5	0
GANAB	0	0	0	8
GART	0	0	0.5	0.5
GATAD2A	0	0	2	0
GCN1L1	0	0	0.5	0.5
GDPD1	0	0	0	1
GIT1	0	0	0	0.5
GLMN	0	0	0.5	0
GMFB	0	0	0.5	0
GNAS	0	0	0.5	0
GOSR2	0	0	0	0.5
GPAA1	0	0	0	1
GPD1L	0	0	0	0.5
GRAMD1A	0	0	0	1
GRB10	0	0	0	0.5
GRIK2	0	0	0	0.5
GRWD1	0	0	0.5	0
GSPT1	0	0	0	0.5
GTF2A1	0	0	0.5	0
GTF2F2	0	0	1	0
GYS1	0	0	0.5	1
H2AFY2	0	0	0.5	0
HADHA	0	0	0.5	1.5
HAX1	0	0	0.5	0.5
HBB	0	0	0	0.5
HBS1L	0	0	0	0.5
HCFC2	0	0	0	1
HDAC6	0	0	0	0.5
HDLBP	0	0	3	8.5
HINT1	0	0	1.5	0
HK1	0	0	0.5	1
HM13	0	0	0	1
HOOK2	0	0	0.5	0.5
HSBP1	0	0	0.5	0.5
HSD11B2	0	0	0	5.5
HSD17B12	0	0	0	3
HSD3B7	0	0	0	1.5
HSP90AA2P	0	0	0.5	1
HSPA8	0	0	0.5	0.5
HSPB11	0	0	1	0
HSPE1	0	0	0	1
HSPH1	0	0	0	1
HUWE1	0	0	1.5	0
HYOU1	0	0	0	3.5
IARS	0	0	0.5	0
ICMT	0	0	0	1
IDH3A	0	0	0	0.5
IER3IP1	0	0	0	0.5
IFIT3	0	0	0.5	0
ILVBL	0	0	0	5.5
IMPA2	0	0	1	0
INF2	0	0	0	0.5
IPO4	0	0	2	3
IQGAP1	0	0	0.5	0
ISG15	0	0	0.5	0
ISOC2	0	0	1	0
ITGB1	0	0	0	1
JAGN1	0	0	0	1
JPT2	0	0	1	0
KDELR2	0	0	0.5	0.5
KDM2A	0	0	1	0
KDM3A	0	0	0.5	0
KDM5D	0	0	0.5	0
KIF5A	0	0	0	0.5
KNL1	0	0	0.5	0
KPNA5	0	0	0.5	0
KPNA6	0	0	0.5	0
KTN1	0	0	0	1
LARP4	0	0	1	0
LBR	0	0	0	0.5
LCP1	0	0	0.5	0
LEMD2	0	0	0	0.5
LENG9	0	0	0.5	0
LMAN1	0	0	0	1
LMAN2	0	0	0	0.5
LMF2	0	0	0	2
LMNB2	0	0	0.5	0.5
LPCAT1	0	0	0	2.5
LPCAT3	0	0	0	4
LPCAT4	0	0	0	0.5
LRRC59	0	0	0	7
LSM3	0	0	0.5	0
LSS	0	0	0	0.5
LTA4H	0	0	1.5	0
LUC7L	0	0	1	0
LYPLA2	0	0	0	0.5
MAGT1	0	0	0	1.5
MAOA	0	0	0	0.5
MAP2K1	0	0	0	0.5
MAP4	0	0	0	0.5
MAPK1	0	0	0.5	0
MBD2	0	0	1	0
MBOAT7	0	0	0	3
MCMBP	0	0	0.5	0
MDN1	0	0	1	0
MED19	0	0	0.5	0
MED24	0	0	0.5	0
MELK	0	0	0.5	0
METTL13	0	0	0	0.5
METTL4	0	0	0.5	0
METTL7A	0	0	0	1
MFAP1	0	0	1.5	0
MFSD10	0	0	0	0.5
MGST1	0	0	0	2.5
MIA3	0	0	0	2.5
MIGA1	0	0	1	0.5
MLEC	0	0	0	7
MMGT1	0	0	0	0.5
MOCS3	0	0	0.5	0
MOGS	0	0	0	4
MOSPD3	0	0	0	0.5
MPLKIP	0	0	0.5	0
MPST	0	0	0.5	0.5
MPV17	0	0	0	0.5
MROH1	0	0	0.5	0
MRPL28	0	0	0	0.5
MT3	0	0	0.5	0
MTCH2	0	0	0	0.5
MTDH	0	0	0	5.5
MTOR	0	0	0.5	0
MYEF2	0	0	1	0
MYL12A	0	0	0.5	1
NABP2	0	0	0.5	0
NAP1L4	0	0	0.5	5
NAPA	0	0	1	0.5
NAPG	0	0	0	0.5
NBAS	0	0	0	0.5
NCLN	0	0	0	1.5
NCLN	0	0	0	0.5
NDC1	0	0	0	0.5
NEDD8	0	0	1	0
NFIX	0	0	0.5	0
NFXL1	0	0	0	1
NHLRC2	0	0	0	0.5
NIT2	0	0	0.5	0
NOL3	0	0	0	0.5
NOMO3	0	0	0	2.5
NPEPPS	0	0	0.5	0
NSDHL	0	0	0	0.5
NSF	0	0	0	0.5
NT5C2	0	0	0.5	0
NTPCR	0	0	0	0.5
NUMA1	0	0	0.5	0
NUP188	0	0	0	0.5
NUP210	0	0	0	0.5
NUP85	0	0	1	0
NUP93	0	0	0	0.5
NUP98	0	0	0.5	0
OARD1	0	0	0.5	0
ODR4	0	0	0	0.5
OS9	0	0	0	0.5
OSBPL8	0	0	0	2.5
PAFAH1B2	0	0	0.5	0.5
PAICS	0	0	3	1.5
PAIP2	0	0	1	0.5
PARP16	0	0	0	0.5
PARP9	0	0	0	0.5
PAWR	0	0	0	0.5
PAXBP1	0	0	0.5	0
PCBP4	0	0	0.5	0
PCK1	0	0	0	0.5
PCYT1B	0	0	0.5	0
PDIA3	0	0	0	23.5
PDIA3	0	0	0	1
PDIA4	0	0	0	2.5
PEG3	0	0	0.5	0
PELO	0	0	0	0.5
PFDN6	0	0	0.5	0
PFKL	0	0	0	0.5
PGP	0	0	1	0
PGRMC1	0	0	0	1.5
PGRMC2	0	0	0	1.5
PHF8	0	0	0.5	0
PHPT1	0	0	0.5	0
PI15	0	0	0	0.5
PIGN	0	0	0	1
PIGO	0	0	0	1
PIGS	0	0	0	2.5
PIGT	0	0	0	1.5
PIGU	0	0	0	1
PIK3R2	0	0	0	0.5
PIWIL3	0	0	0	0.5
PKMYT1	0	0	0	1
PLA2G6	0	0	0	0.5
PLPP6	0	0	0	1
PLXNB2	0	0	1	0.5
POLDIP3	0	0	1	0
POLR2E	0	0	1.5	0
POMGNT2	0	0	0	4
PON2	0	0	0	2.5
POR	0	0	0	4.5
PPIAL4G	0	0	0.5	0
PPIL3	0	0	0.5	0
PPP1R12A	0	0	1	0.5
PRAF2	0	0	0	1.5
PRAME	0	0	1.5	0
PRDX3	0	0	0.5	0.5
PREB	0	0	0	2
PRKCD	0	0	0	0.5
PRKCI	0	0	0.5	0
PRKCSH	0	0	0	0.5
PRKD3	0	0	0.5	0
PRKRA	0	0	0	0.5
PSG11	0	0	0.5	0
PSMA1	0	0	0.5	0
PSMA6	0	0	1	0
PSMA7	0	0	0	0.5
PSMC1	0	0	0.5	0
PSMC4	0	0	1	0.5
PSMD8	0	0	0.5	0.5
PSME1	0	0	1	0
PSME2	0	0	0.5	0
PTDSS1	0	0	0	0.5
PTGR2	0	0	0.5	0
PTPN1	0	0	0	3
PTRH2	0	0	0	5.5
PYCR3	0	0	0.5	0
PYGB	0	0	1	1.5
RAB10	0	0	0.5	1.5
RAB11B	0	0	0	0.5
RAB14	0	0	0	0.5
RAB1A	0	0	0	2
RAB1B	0	0	0	0.5
RAB21	0	0	0	0.5
RAB2A	0	0	0	1
RAB2B	0	0	0	1
RAB3GAP2	0	0	0	1
RAB5C	0	0	1	4
RAB7A	0	0	0	4
RAD9A	0	0	0.5	0
RANBP1	0	0	0.5	2
RANBP2	0	0	6.5	0
RANBP6	0	0	1	0
RANGAP1	0	0	1	0.5
RARS	0	0	1	0.5
RAVER1	0	0	1	0
RB1CC1	0	0	0.5	0
RBM10	0	0	1	0
RBM12B	0	0	0.5	0
RBM15	0	0	0.5	0
RBM19	0	0	0.5	0
RBM27	0	0	0.5	0
RBM45	0	0	0.5	0
RCN2	0	0	0	0.5
RDH11	0	0	1	8
RDH14	0	0	0	1
REEP6	0	0	0	1
RER1	0	0	0	0.5
RETSAT	0	0	0	2.5
RGS3	0	0	0.5	0
RINT1	0	0	0	2
RMDN3	0	0	1	0.5
RNF14	0	0	1	0
RNF145	0	0	0	1
RNF2	0	0	0.5	0
RNF213	0	0	1.5	2
RNF214	0	0	0.5	0.5
RNF41	0	0	0	1.5
RNPEP	0	0	3	0
RPL10	0	0	0	0.5
RPL26L1	0	0	0.5	1
RPL32	0	0	0	0.5
RPL34	0	0	0	0.5
RPL5	0	0	1	0
RPS11	0	0	0.5	0.5
RPS19	0	0	0.5	1.5
RPS26P11	0	0	0	0.5
RPS29	0	0	0.5	0
RPS4Y1	0	0	0.5	1
RPS5	0	0	0	1
RPS6KA2	0	0	0.5	0
RRBP1	0	0	0	1.5
RRM1	0	0	0.5	0
RRP12	0	0	1	0
RXRB	0	0	0.5	0
SACM1L	0	0	0	9.5
SAR1B	0	0	0	2
SARAF	0	0	0	1
SBNO2	0	0	0.5	0
SCAP	0	0	0	0.5
SCD	0	0	0	1
SCFD1	0	0	0	2
SCP2	0	0	0	0.5
SCYL1	0	0	0.5	1.5
SDE2	0	0	0.5	0
SDF4	0	0	0	0.5
SDSL	0	0	1	0
SEC11A	0	0	0	1
SEC16A	0	0	0	1.5
SEC22B	0	0	0.5	8.5
SEC22B	0	0	0	1
SEC23A	0	0	1.5	2.5
SEC23B	0	0	0	0.5
SEC24A	0	0	0	0.5
SEC31A	0	0	0	0.5
SEC63	0	0	0	6
SEL1L	0	0	0	2
SEL1L3	0	0	0	0.5
SELENOI	0	0	0	0.5
SELENOT	0	0	0	1
SENP7	0	0	0.5	0
SERPINB6	0	0	0.5	0.5
SETX	0	0	1	0
SFXN1	0	0	0.5	1
SGPL1	0	0	0	7.5
SHMT2	0	0	0	0.5
SLC22A18	0	0	0	0.5
SLC25A1	0	0	0.5	0.5
SLC25A10	0	0	0.5	1
SLC27A1	0	0	0	0.5
SLC27A2	0	0	0.5	4
SLC33A1	0	0	0	0.5
SLC39A7	0	0	0	0.5
SLC4A1AP	0	0	0.5	0
SLC9A3R1	0	0	0.5	0
SMARCA1	0	0	1	0
SMARCAD1	0	0	0.5	0
SMNDC1	0	0	0.5	0
SMPD4	0	0	0	1.5
SNRPA	0	0	1.5	0
SPCS2	0	0	0	2
SPEF2	0	0	0	0.5
SPTLC1	0	0	0	4
SPTLC2	0	0	0	1.5
SRC	0	0	0.5	1
SRD5A3	0	0	0	1.5
SREBF1	0	0	0	0.5
SREK1	0	0	1	0
SRP54	0	0	0	6
SRP68	0	0	0	3.5
SRPRA	0	0	0	5
SRPRB	0	0	0	7
SRSF4	0	0	0.5	0
SSR1	0	0	0	2
SSR3	0	0	0	1.5
SSR4	0	0	0	3
ST7	0	0	0	0.5
STAU1	0	0	0	0.5
STEAP2	0	0	2.5	2
STIM1	0	0	0	2
STRAP	0	0	0.5	1
STT3A	0	0	0	8.5
STT3B	0	0	0	5.5
STUB1	0	0	1	0
STX17	0	0	0	1.5
STX18	0	0	0	0.5
SUGP1	0	0	0.5	0
SUN2	0	0	0	0.5
SUPT6H	0	0	1	0
SUPT7L	0	0	0.5	0
SYMPK	0	0	0.5	0
TADA2B	0	0	0.5	0
TAGLN2	0	0	0.5	0.5
TALDO1	0	0	2	0
TAP1	0	0	0	1
TARBP1	0	0	0.5	0
TBC1D9B	0	0	0	1
TBCA	0	0	1	0
TBCB	0	0	1.5	0.5
TBCD	0	0	1	1
TBL1XR1	0	0	0.5	0
TBL2	0	0	0	10
TCF25	0	0	0	1
TECR	0	0	0	8
TEX264	0	0	0	1
THEM6	0	0	0	3
THUMPD3	0	0	0	0.5
TIMELESS	0	0	0.5	0
TIMM13	0	0	0	0.5
TKFC	0	0	0.5	0
TM7SF2	0	0	0	1.5
TMBIM6	0	0	0	0.5
TMCO1	0	0	0	0.5
TMED10	0	0	0	1.5
TMED2	0	0	0	1
TMEM109	0	0	0	1
TMEM147	0	0	0	0.5
TMEM14C	0	0	0	0.5
TMEM161A	0	0	0	1.5
TMEM205	0	0	0	1
TMEM214	0	0	0	3.5
TMEM260	0	0	0	1
TMEM33	0	0	0	4
TMEM38B	0	0	0	2
TMPPE	0	0	0	0.5
TMTC3	0	0	0	1.5
TMX2	0	0	0	3
TMX3	0	0	0	0.5
TNPO2	0	0	1	0.5
TOR1A	0	0	0	0.5
TOR1AIP1	0	0	0	1
TOR1B	0	0	0	0.5
TP53BP1	0	0	0.5	0
TPRKB	0	0	1	0
TRAF4	0	0	0.5	0.5
TRIM13	0	0	0	0.5
TRIM26	0	0	0	0.5
TRIM4	0	0	0	1.5
TRIP13	0	0	0	0.5
TRPM4	0	0	0	0.5
TRPT1	0	0	0.5	0
TSPYL1	0	0	1	0
TSTD1	0	0	0.5	0
TTF2	0	0	0	0.5
TUBA4A	0	0	1.5	2
TUBAL3	0	0	0.5	0.5
TUBG1	0	0	0	1
TYMS	0	0	0.5	0
TYW1	0	0	0	0.5
UBAC2	0	0	0	1.5
UBE2E1	0	0	0.5	0
UBE2J1	0	0	0	1
UBE2O	0	0	8.5	0
UBE4A	0	0	1	4
UBR2	0	0	1.5	0
UBR3	0	0	0.5	0
UBXN1	0	0	2.5	0
UBXN4	0	0	0	1
UBXN8	0	0	0	1
UFM1	0	0	0	1
UFSP2	0	0	0	6
UGGT1	0	0	0	4.5
UGT2B11	0	0	0	0.5
UGT2B17	0	0	0	3
UIMC1	0	0	0.5	0
USE1	0	0	0	1
USP19	0	0	0.5	0.5
USP33	0	0	0	0.5
USP9X	0	0	0.5	1
VAPA	0	0	0	3
VAPB	0	0	0	2.5
VAV2	0	0	0	1.5
VCL	0	0	0	0.5
VPS13C	0	0	0	0.5
VPS29	0	0	1	0
VPS33A	0	0	0.5	0
VPS35	0	0	0	0.5
VPS37C	0	0	0.5	0
VTA1	0	0	3	0.5
WAC	0	0	1	0
WAPL	0	0	1	0
WDR1	0	0	0	1.5
WDR18	0	0	0.5	0
WDR43	0	0	0.5	0
WFS1	0	0	0	5.5
XPC	0	0	0.5	0
XPO4	0	0	0.5	0
XPO7	0	0	0.5	0
XXYLT1	0	0	0	1
YEATS2	0	0	0.5	0
YKT6	0	0	0	1
ZC3H18	0	0	1	0
ZC3H7B	0	0	0	0.5
ZC3HAV1	0	0	0	4
ZFP36L2	0	0	0.5	0
ZFX	0	0	0.5	0
ZFYVE1	0	0	0	1
ZMPSTE24	0	0	0	1.5
ZMYM2	0	0	0.5	0
ZNF326	0	0	0.5	0
ZNF503	0	0	0	0.5
ZNF618	0	0	0.5	0
ZW10	0	0	0	0.5
ZWILCH	0	0	0	0.5
